# Supplementary material for: Ir-catalyzed selective reduction of CO2 to the methoxy or formate level with HSiMe(OSiMe3)2
Source: Royal Society of Chemistry journal article supplement (doi:10.1039/c8cy02353k), 2019-01-01
Supplement: c8cy02353k1.pdf [file c8cy02353k1.pdf]

## Supplementary Information

|                                                                                                                                                                                            |    |
|--------------------------------------------------------------------------------------------------------------------------------------------------------------------------------------------|----|
| 1. Characterization of the ligand precursor HSiN ( <b>1</b> ).....                                                                                                                         | 2  |
| 2. Characterization of complex $[\text{Ir}(\mu\text{-Cl})(\kappa^2\text{-NSi})_2]_2$ ( <b>2</b> ) .....                                                                                    | 3  |
| 3. Characterization of complex $[\text{Ir}(\text{CF}_3\text{CO}_2)(\kappa^2\text{-NSi})_2]$ ( <b>3</b> ) .....                                                                             | 6  |
| 4. Selected X-ray details .....                                                                                                                                                            | 8  |
| 5. <b>3</b> -Catalyzed (5 mol %) hydrosilylation of $\text{CO}_2$ (4 bar) at RT.....                                                                                                       | 9  |
| a) Using $\text{HSiMe}_2\text{Ph}$ as reductant.....                                                                                                                                       | 9  |
| b) Using $\text{HSiMePh}_2$ as reductant.....                                                                                                                                              | 10 |
| c) Using $\text{HSiMe}(\text{OSiMe}_3)_2$ as reductant. ....                                                                                                                               | 11 |
| d) <b>3</b> -Catalyzed (5 mol %) hydrosilylation of $\text{CO}_2$ (4 bar) at RT .....                                                                                                      | 12 |
| 6. <b>3</b> -Catalyzed (1 mol %) hydrosilylation of $\text{CO}_2$ (3 bar) at RT.....                                                                                                       | 13 |
| a) Using $\text{HSiMe}_2\text{Ph}$ as reductant.....                                                                                                                                       | 13 |
| b) Using $\text{HSiMePh}_2$ as reductant.....                                                                                                                                              | 14 |
| c) Using $\text{HSiMe}(\text{OSiMe}_3)_2$ as reductant. ....                                                                                                                               | 15 |
| 7. <b>3</b> -Catalyzed (1 mol %) hydrosilylation of $^{13}\text{CO}_2$ (2.6 bar) with $\text{HSiMe}(\text{OSiMe}_3)_2$ at 298K .....                                                       | 16 |
| 8. Selected NMR spectra of the reaction products of the <b>3</b> -catalyzed hydrosilylation of $\text{CO}_2$ (1 bar) with $\text{HSiMe}(\text{OSiMe}_3)_2$ in $\text{C}_6\text{D}_6$ ..... | 17 |
| 9. Comparison of the catalytic activity of complex <b>3</b> (1 mol %) with 1 vs 3 bar of $\text{CO}_2$ at RT in $\text{C}_6\text{D}_6$ .....                                               | 19 |
| 10. Comparison of the catalytic activity of complex <b>3</b> and NSiN complex .....                                                                                                        | 20 |
| 11. Selected $^{19}\text{F}$ NMR spectra from different reactions conditions after the catalytic process .....                                                                             | 21 |
| 12. High-Resolution Mass-Spectrum of the complexes <b>2</b> and <b>3</b> .....                                                                                                             | 21 |
| 13. DFT Calculations.....                                                                                                                                                                  | 23 |
| 14. Other mechanistic alternatives for conversion of <b>I</b> and <b>J</b> .....                                                                                                           | 24 |
| 15. Comparison between Gibbs free energy profiles to the methoxysilane product step using $\text{HSiMe}_3$ and $\text{HSiMe}(\text{OMe})_2$ silanes .....                                  | 25 |
| 16. Full citation for the G09 program.....                                                                                                                                                 | 26 |
| 17. Geometrical Representation of all DFT optimized structures .....                                                                                                                       | 27 |

# 1. Characterization of the ligand precursor HSiN (1)

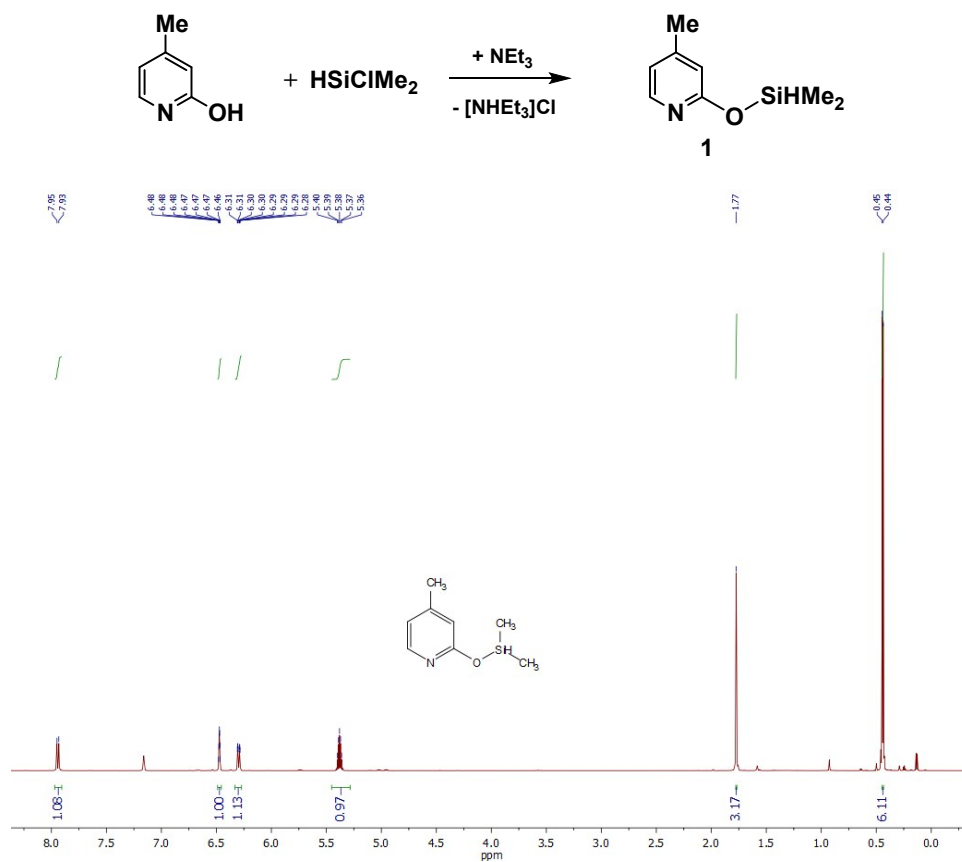

Figure S1.  $^1\text{H}$  NMR spectrum of **1**

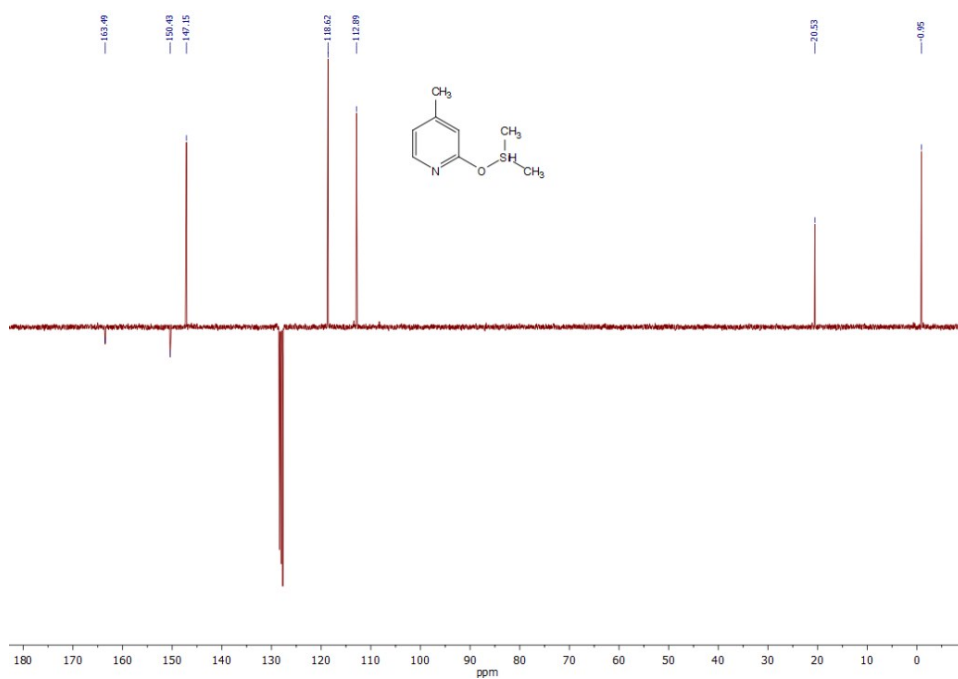

Figure S2.  $^{13}\text{C}$ -APT NMR spectrum of **1**

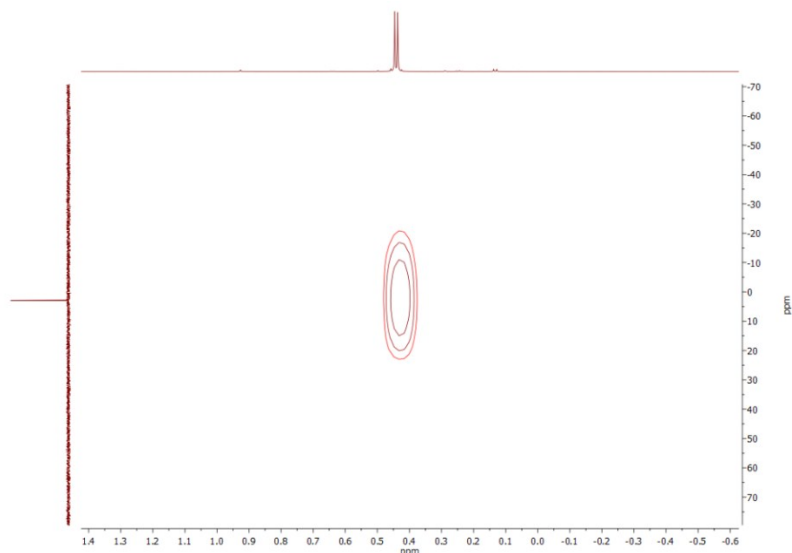

Figure S3.  $^1\text{H}$ - $^{29}\text{Si}$  HMBC NMR spectrum of **1**

## 2. Characterization of complex $[\text{Ir}(\mu\text{-Cl})(\kappa^2\text{-NSi})_2]_2$ (**2**)

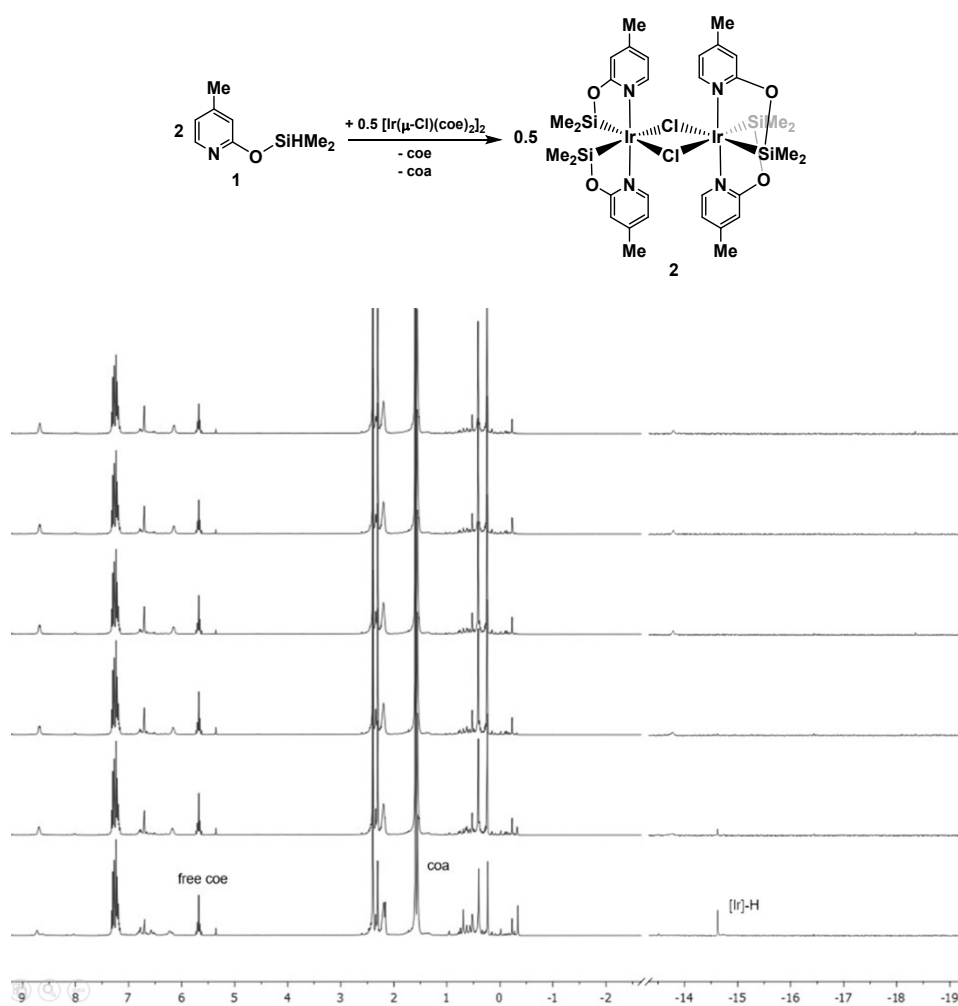

Figure S4.  $^1\text{H}$  NMR spectra from the formation of **2**

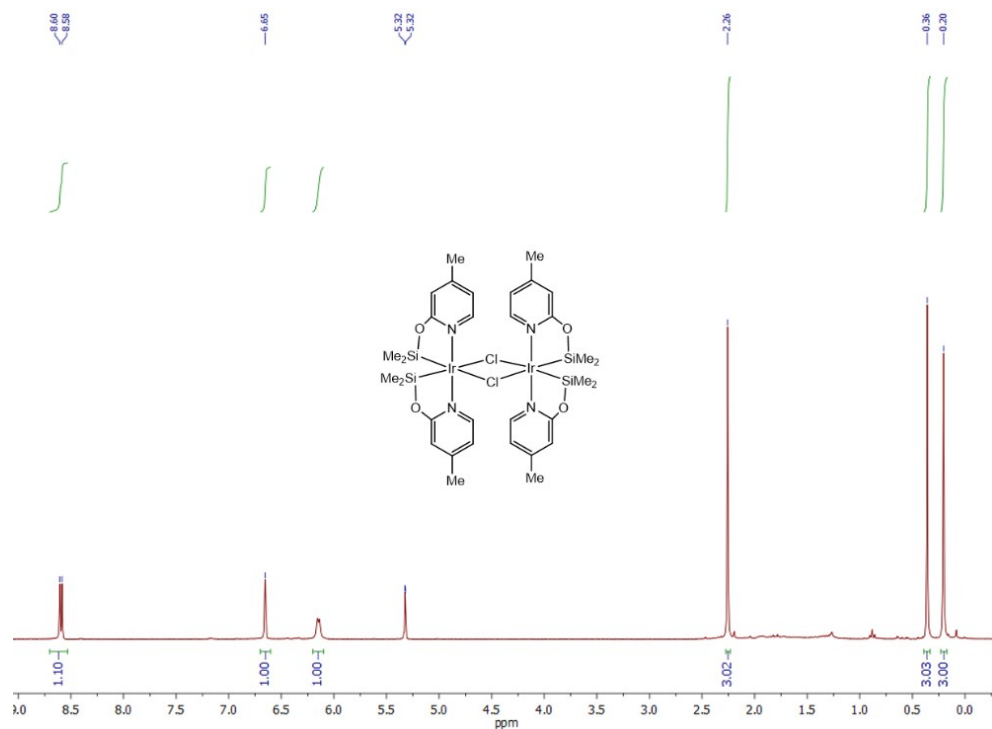

Figure S5.  $^1\text{H}$  NMR spectrum of complex 2

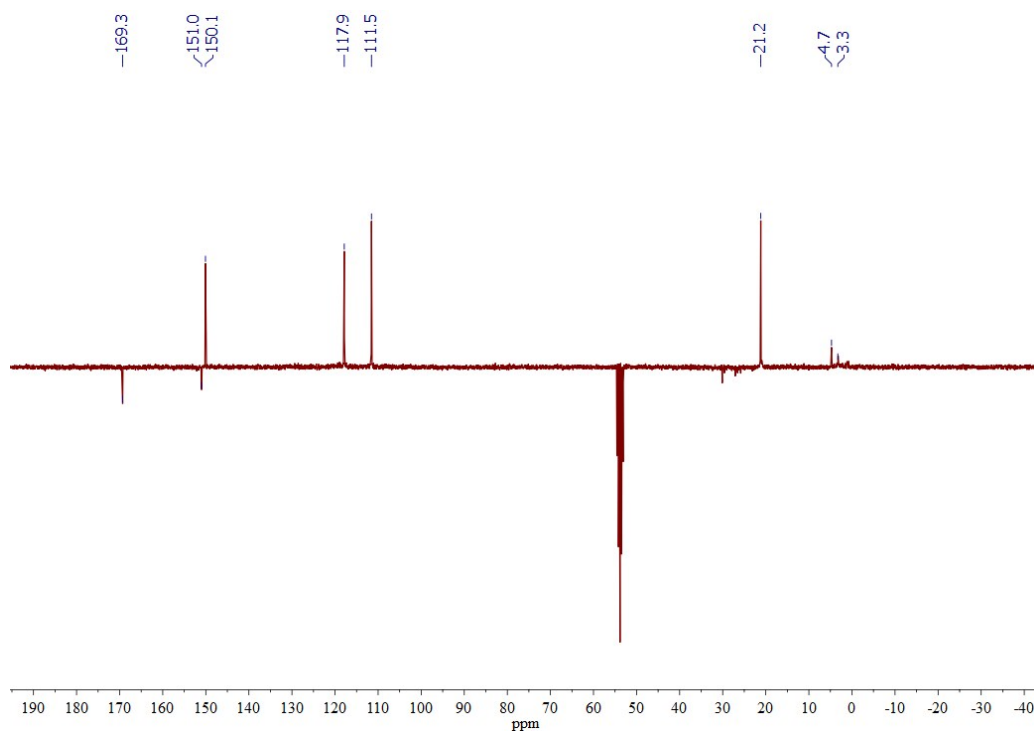

Figure S6.  $^{13}\text{C}$ -APT NMR spectrum of complex 2

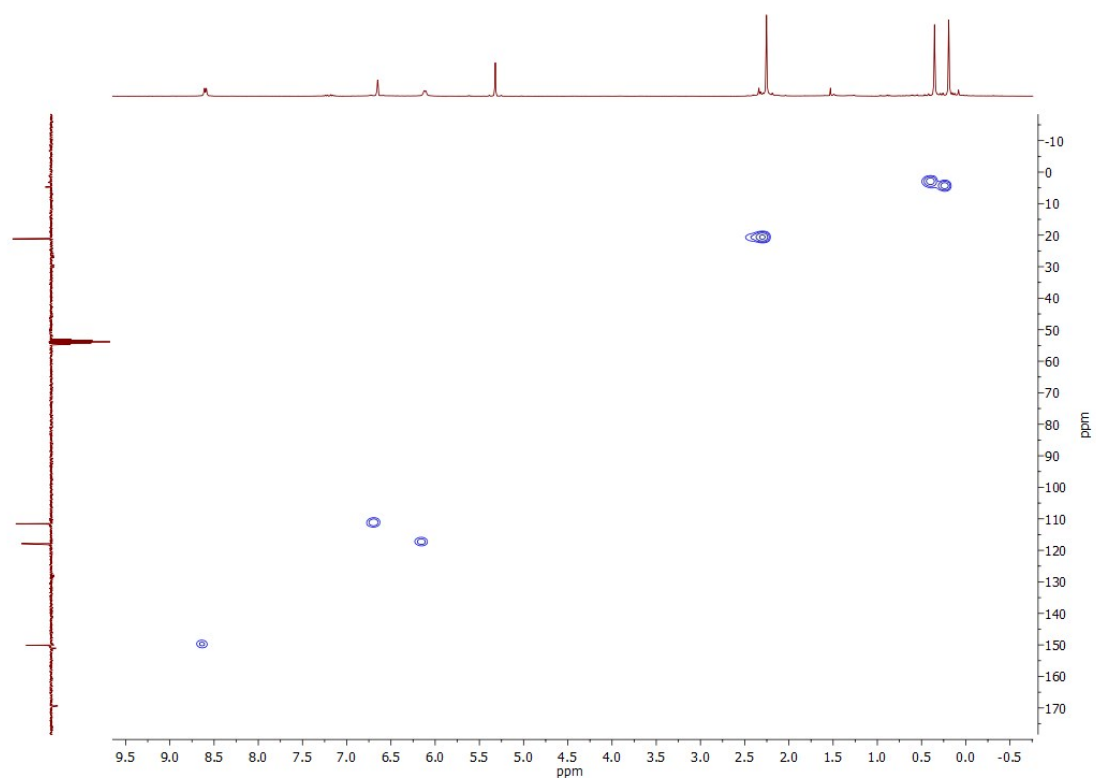

**Figure S7.**  $^1\text{H}$ - $^{13}\text{C}$  HSQC NMR spectrum of complex **2**

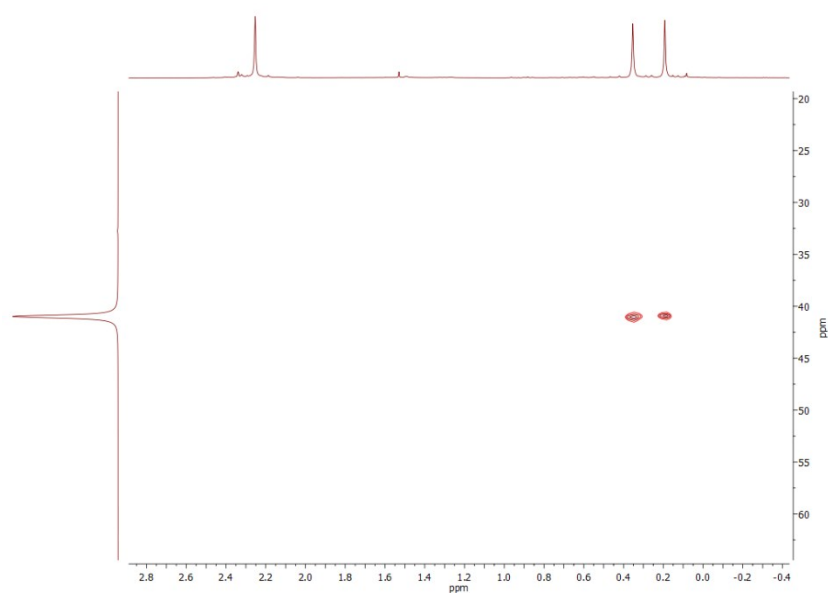

**Figure S8.**  $^1\text{H}$ - $^{29}\text{Si}$  HMBC NMR spectrum of complex **2**

### 3. Characterization of complex $[\text{Ir}(\text{CF}_3\text{CO}_2)(\kappa^2\text{-NSi})_2]$ (**3**)

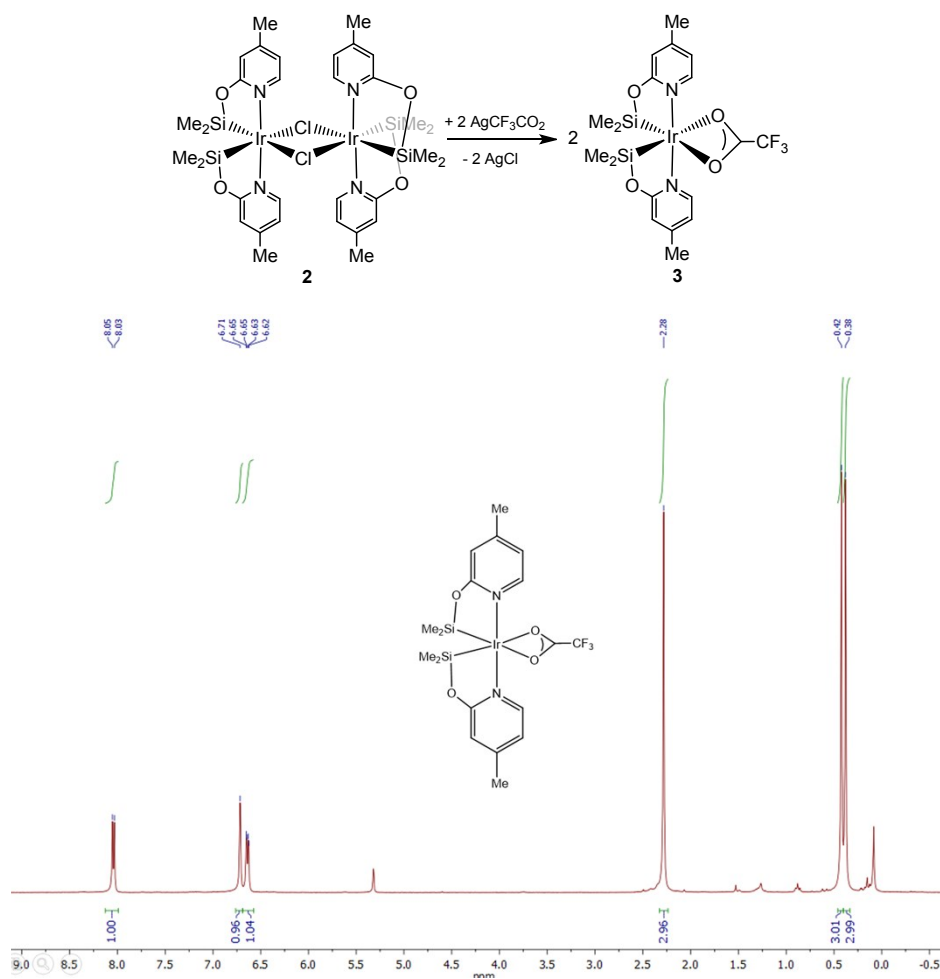

Figure S9.  $^1\text{H}$  NMR spectrum of complex **3**

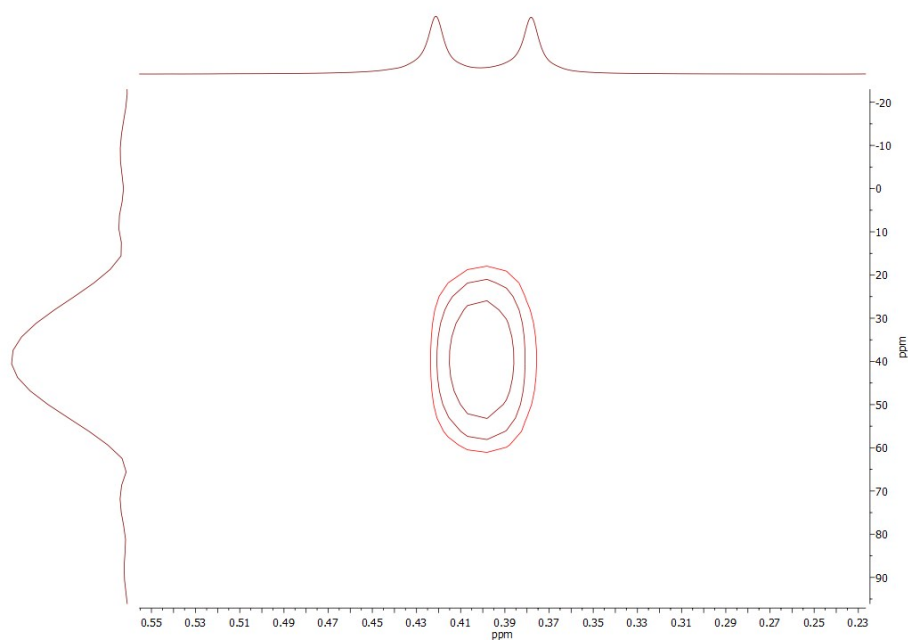

Figure S10.  $^1\text{H}$ - $^{29}\text{Si}$  HMBC NMR spectrum of complex **3**

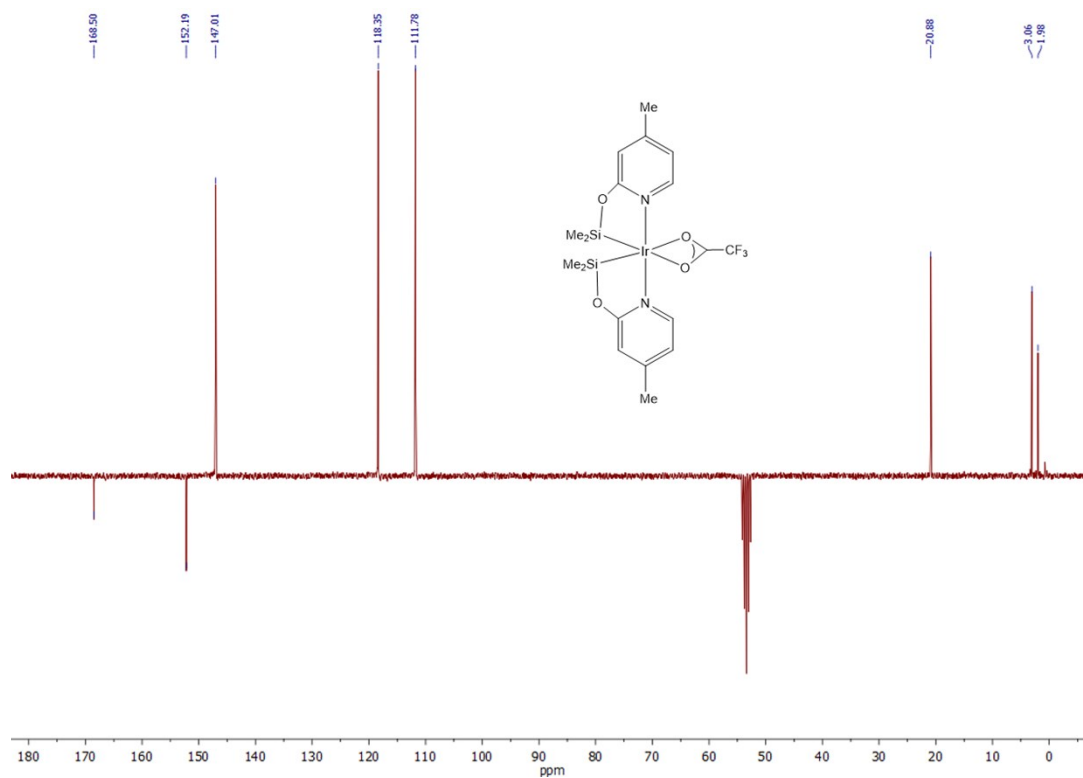

**Figure S11.** <sup>13</sup>C-APT NMR spectrum of complex 3

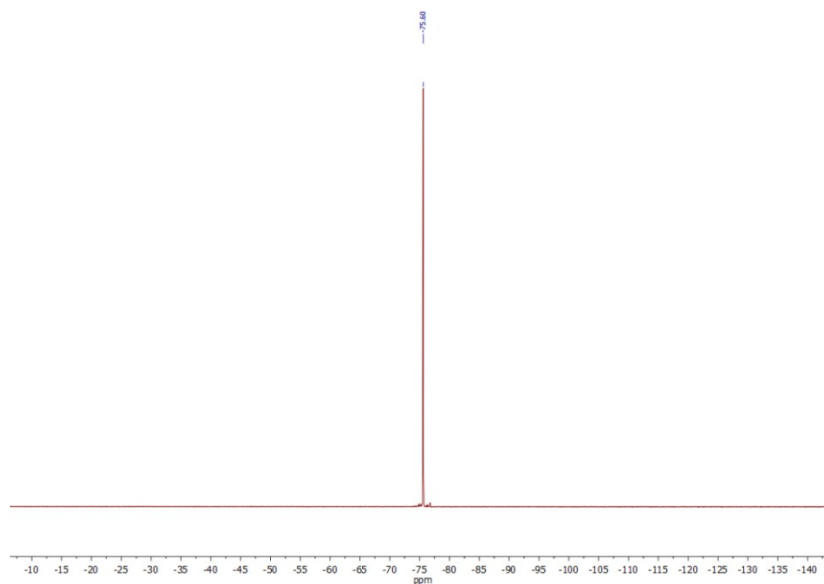

**Figure S12.** <sup>19</sup>F NMR spectrum of complex 3

#### 4. Selected X-ray details

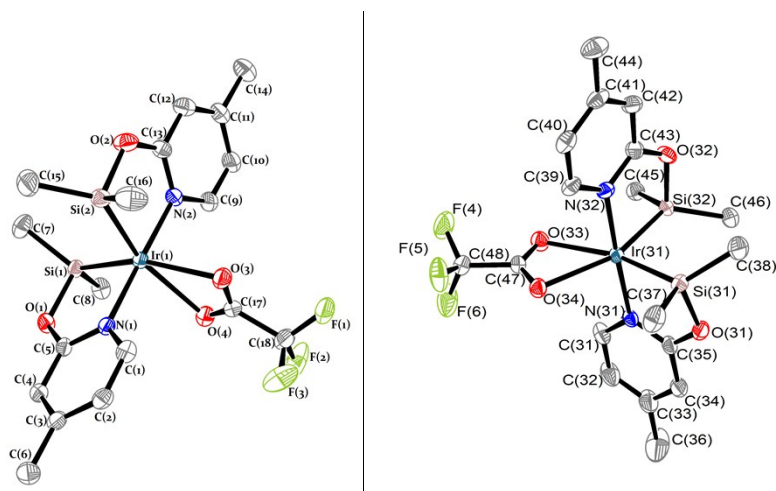

Molecular scheme of both independent molecules of **3**

#### Selected bonds lengths (Å) and angles (°) for both independent molecules of complex **3**.

|                   | Mole 1     |                      | Mole 2     |
|-------------------|------------|----------------------|------------|
| Ir(1)-Si(1)       | 2.2645(10) | Ir(31)-Si(31)        | 2.2505(10) |
| Ir(1)-Si(2)       | 2.2505(11) | Ir(31)-Si(32)        | 2.2570(10) |
| Ir(1)-O(3)        | 2.363(3)   | Ir(31)-O(33)         | 2.414(3)   |
| Ir(1)-O(4)        | 2.418(3)   | Ir(31)-O(34)         | 2.407(2)   |
| Ir(1)-N(1)        | 2.052(3)   | Ir(31)-N(31)         | 2.053(3)   |
| Ir(1)-N(2)        | 2.056(3)   | Ir(31)-N(32)         | 2.049(3)   |
| Si(1)-Ir(1)-Si(2) | 95.84(4)   | Si(31)-Ir(31)-Si(32) | 92.14(4)   |
| Si(1)-Ir(1)-O(3)  | 159.28(7)  | Si(31)-Ir(31)-O(33)  | 164.82(7)  |
| Si(1)-Ir(1)-O(4)  | 104.53(7)  | Si(31)-Ir(31)-O(34)  | 110.28(7)  |
| Si(1)-Ir(1)-N(1)  | 82.22(8)   | Si(31)-Ir(31)-N(31)  | 81.17(9)   |
| Si(1)-Ir(1)-N(2)  | 99.02(9)   | Si(31)-Ir(31)-N(32)  | 95.26(8)   |
| Si(2)-Ir(1)-O(3)  | 104.47(7)  | Si(32)-Ir(31)-O(33)  | 103.00(7)  |
| Si(2)-Ir(1)-O(4)  | 159.54(7)  | Si(32)-Ir(31)-O(34)  | 157.11(7)  |
| Si(2)-Ir(1)-N(1)  | 97.71(9)   | Si(32)-Ir(31)-N(31)  | 98.05(9)   |
| Si(2)-Ir(1)-N(2)  | 82.24(9)   | Si(32)-Ir(31)-N(32)  | 82.05(9)   |
| O(3)-Ir(1)-O(4)   | 55.39(9)   | O(33)-Ir(31)-O(34)   | 54.76(9)   |
| O(3)-Ir(1)-N(1)   | 90.92(10)  | O(33)-Ir(31)-N(31)   | 95.36(11)  |
| O(3)-Ir(1)-N(2)   | 87.90(11)  | O(33)-Ir(31)-N(32)   | 88.09(10)  |
| O(4)-Ir(1)-N(1)   | 87.06(10)  | O(34)-Ir(31)-N(31)   | 90.17(10)  |
| O(4)-Ir(1)-N(2)   | 92.56(11)  | O(34)-Ir(31)-N(32)   | 91.05(11)  |
| N(1)-Ir(1)-N(2)   | 178.76(12) | N(31)-Ir(31)-N(32)   | 176.43(11) |

#### Ring puckering parameters (Å,°) for Ir-Si-O-C-N metallacycles of complexes **2** and **3**.

|                                 |                                 | q          | φ                           | conformation                                 |
|---------------------------------|---------------------------------|------------|-----------------------------|----------------------------------------------|
| <b>Complex 2</b>                | Ir(1)-Si(1)-O(1)-C(5)-N(1)      | 0.050(4)   | 154(5)                      | <sup>5</sup> T <sub>1</sub> / <sup>5</sup> E |
|                                 | Ir(1)-Si(2)-O(2)-C(13)-N(2)     | 0.154(3)   | -148(2)                     | <sup>2</sup> E                               |
|                                 | Ir(2)-Si(3)-O(3)-C(21)-N(3)     | 0.175(3)   | -157(3)                     | <sup>2</sup> T <sub>1</sub>                  |
| <b>Complex 3</b>                | Ir(2)-Si(1)-O(4)-C(29)-N(4)     | 0.120(3)   | -164(2)°                    | <sup>2</sup> T <sub>1</sub>                  |
|                                 | Ir(1)-Si(1)-O(1)-C(5)-N(1)      | 0.0212(1)  | 12.51(13)                   | <sup>1</sup> T <sub>2</sub>                  |
|                                 | Ir(1)-Si(2)-O(2)-C(13)-N(2)     | 0.0700(1)  | -141.93(5)                  | <sup>2</sup> E                               |
|                                 | Ir(31)-Si(31)-O(31)-C(35)-N(31) | 0.202(1)   | -146.08(1)                  | <sup>2</sup> E                               |
| Ir(31)-Si(32)-O(32)-C(43)-N(32) | 0.133(1)                        | -162.01(1) | <sup>2</sup> T <sub>1</sub> |                                              |



## 5. 3-Catalyzed (5 mol %) hydrosilylation of CO<sub>2</sub> (4 bar) at RT

a) Using HSiMe<sub>2</sub>Ph as reductant.

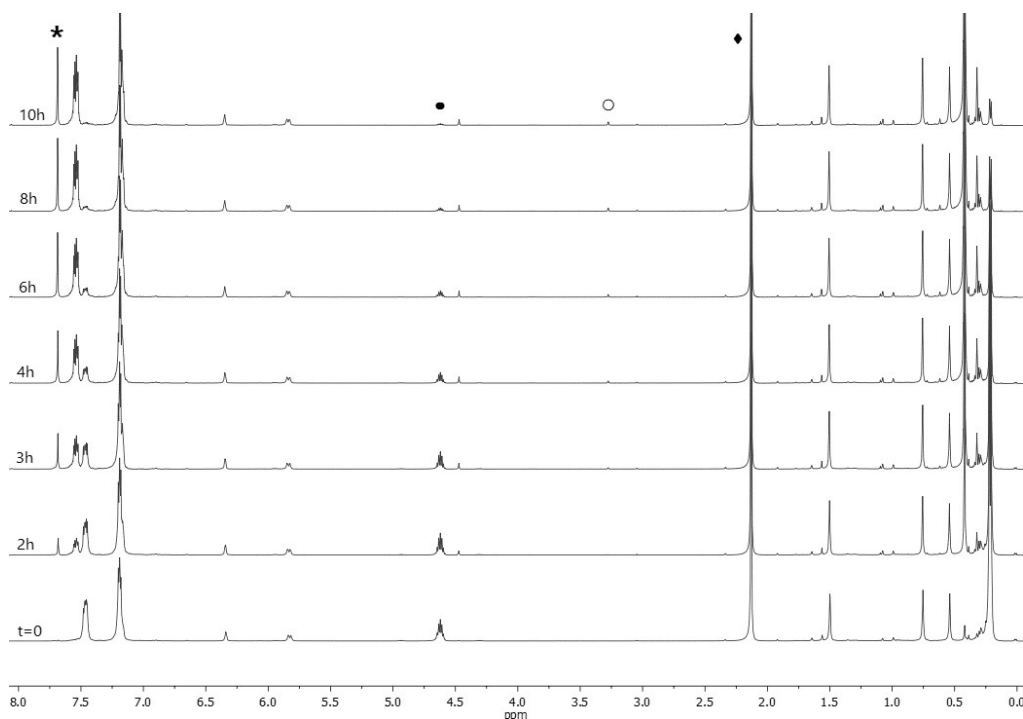

**Figure S13.** <sup>1</sup>H NMR spectra from the reaction of CO<sub>2</sub> with HSiMe<sub>2</sub>Ph.

\* Silylformate • Silane ○ Methoxysilane ♦ Hexamethylbenzene

| time (min) | Integral (6H) | Silane (mmol) | Integral (6H) | Silylformate (mmol) |
|------------|---------------|---------------|---------------|---------------------|
| 5          | 2.11          | 0.14          | 0.04          | 0.00                |
| 121        | 1.54          | 0.10          | 0.56          | 0.04                |
| 235        | 1.11          | 0.07          | 0.97          | 0.06                |
| 366        | 0.67          | 0.04          | 1.46          | 0.09                |
| 480        | 0.39          | 0.03          | 1.75          | 0.11                |
| 594        | 0.19          | 0.01          | 1.97          | 0.13                |
| 709        | 0.10          | 0.01          | 2.18          | 0.14                |

0.022 mmol of hexamethylbenzene added

*Integrals are relative to that of the hexamethylbenzene signal, taken as one. Considering the number of protons responsible for each signal and the amount of mmol of C<sub>6</sub>Me<sub>6</sub> added to the solution (which is about 0.018 mmol), the amount of mmol of the different molecules can be obtained.*

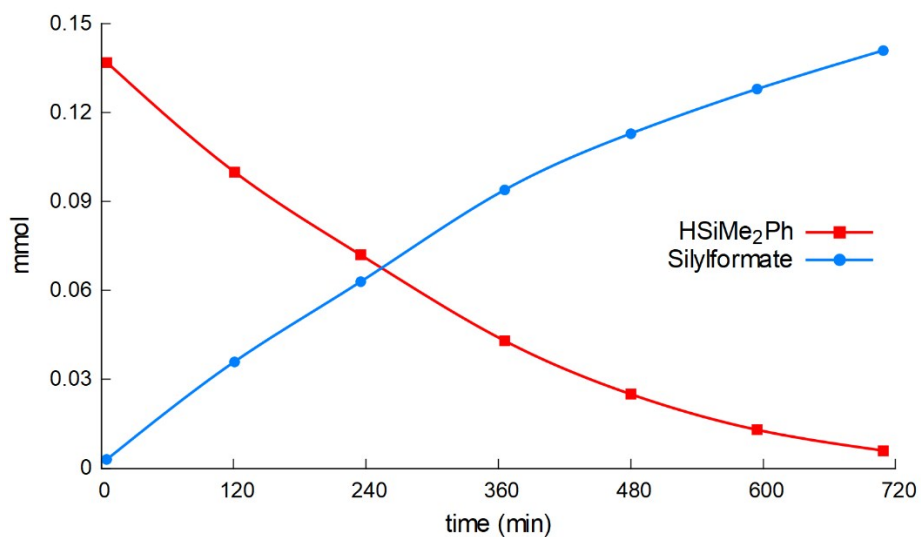

b) Using HSiMePh<sub>2</sub> as reductant.

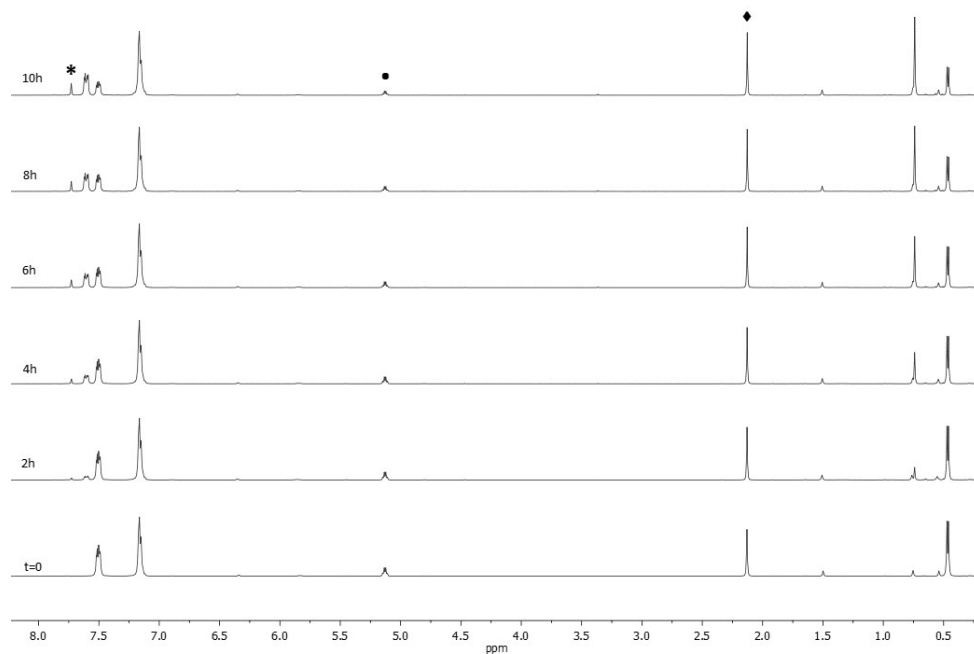

**Figure S14.** <sup>1</sup>H NMR spectra from the reaction of CO<sub>2</sub> with HSiMePh<sub>2</sub>.  
\* Silylformate • Silane ♦ Hexamethylbenzene

| time (min) | Integral (3H) | Silane (mmol) | Integral (3H) | Silylformate (mmol) |
|------------|---------------|---------------|---------------|---------------------|
| 2          | 1.57          | 0.14          | 0.00          | 0.00                |
| 118        | 1.34          | 0.12          | 0.14          | 0.01                |
| 232        | 1.11          | 0.10          | 0.30          | 0.03                |
| 363        | 0.89          | 0.08          | 0.45          | 0.04                |
| 477        | 0.74          | 0.06          | 0.55          | 0.05                |
| 608        | 0.60          | 0.05          | 0.66          | 0.06                |

0.015 mmol of hexamethylbenzene added

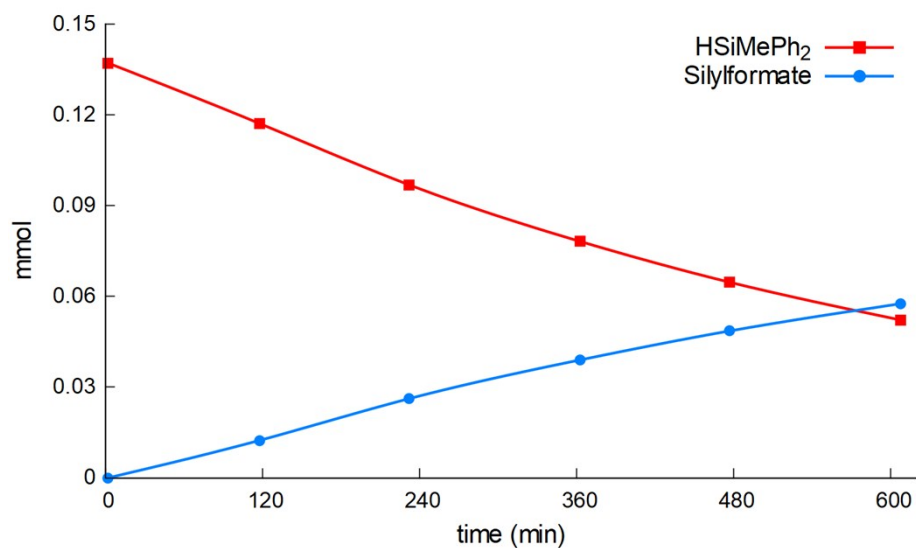

c) Using HSiMe(OSiMe<sub>3</sub>)<sub>2</sub> as reductant.

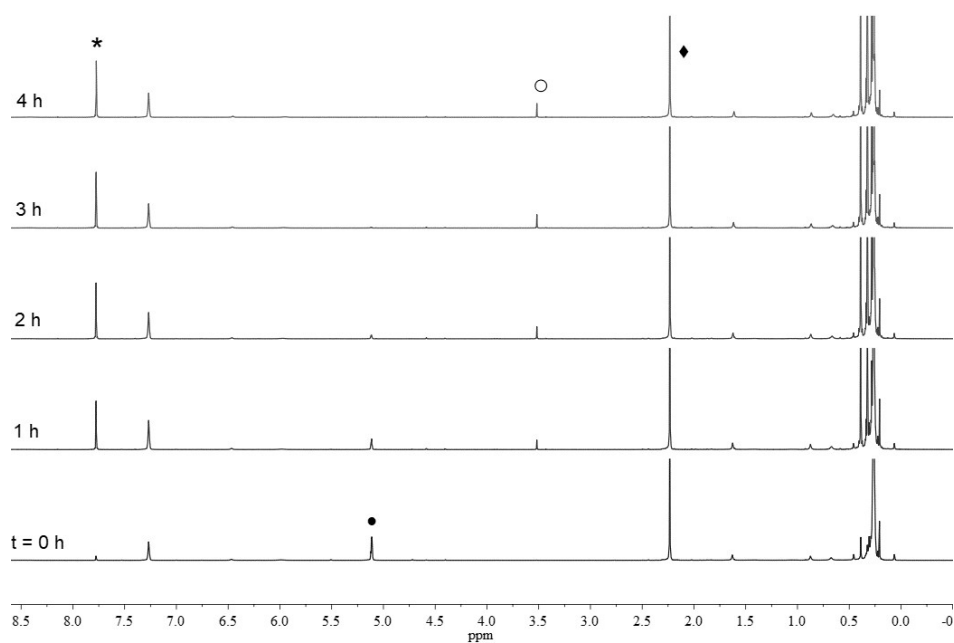

**Figure S15.** <sup>1</sup>H NMR spectra from the reaction of CO<sub>2</sub> with HSiMe(OSiMe<sub>3</sub>)<sub>2</sub>.  
 \* Silylformate • Silane ○ Methoxysilane ◆ Hexamethylbenzene

| time (min) | Integral(1H) | Silane (mmol) | Integral(1H) | Silylformate (mmol) | Integral(3H) | Methoxysilane (mmol) |
|------------|--------------|---------------|--------------|---------------------|--------------|----------------------|
| 0          | 0.40         | 0.14          | 0.00         | 0.00                | 0.00         | 0.00                 |
| 26         | 0.27         | 0.10          | 0.08         | 0.03                | 0.00         | 0.00                 |
| 68         | 0.12         | 0.05          | 0.18         | 0.07                | 0.03         | 0.00                 |
| 89         | 0.08         | 0.03          | 0.20         | 0.08                | 0.04         | 0.01                 |
| 110        | 0.05         | 0.02          | 0.22         | 0.08                | 0.05         | 0.01                 |
| 152        | 0.02         | 0.01          | 0.25         | 0.09                | 0.06         | 0.01                 |
| 173        | 0.01         | 0.00          | 0.25         | 0.09                | 0.06         | 0.01                 |
| 215        | 0.00         | 0.00          | 0.25         | 0.10                | 0.06         | 0.01                 |
| 236        | 0.00         | 0.00          | 0.26         | 0.10                | 0.06         | 0.01                 |

0.021 mmol of hexamethylbenzene added

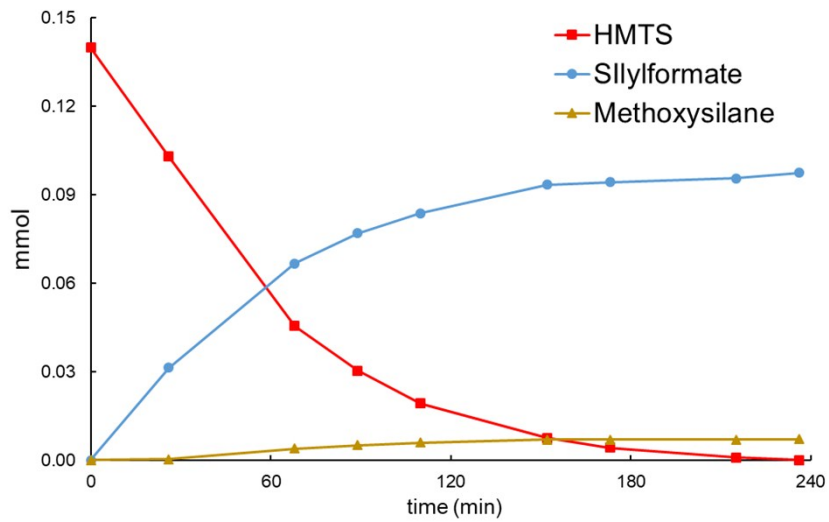

d) 3-Catalyzed (5 mol %) hydrosilylation of CO<sub>2</sub> (4 bar) at RT

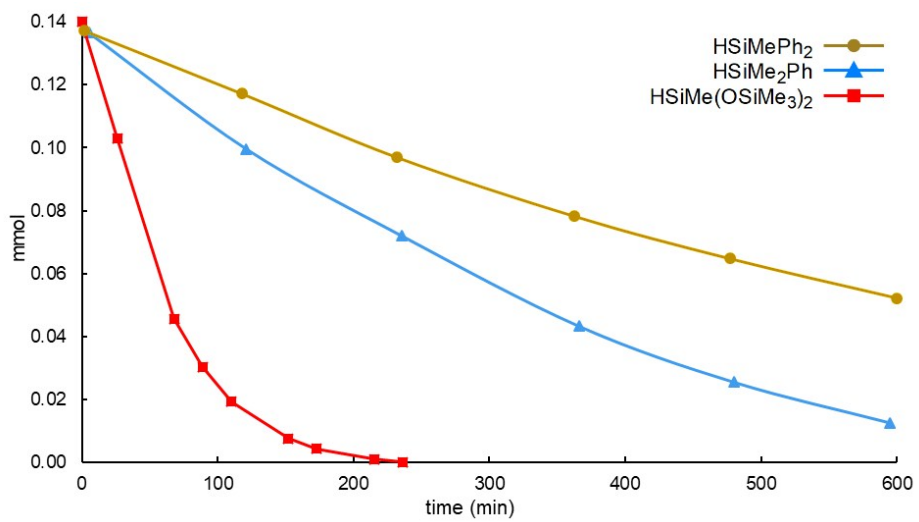

Variation of the concentration of the different silanes over time. HMTS = HSiMe(OSiMe<sub>3</sub>)<sub>2</sub>.

## 6. 3-Catalyzed (1 mol %) hydrosilylation of CO<sub>2</sub> (3 bar) at RT

a) Using HSiMe<sub>2</sub>Ph as reductant.

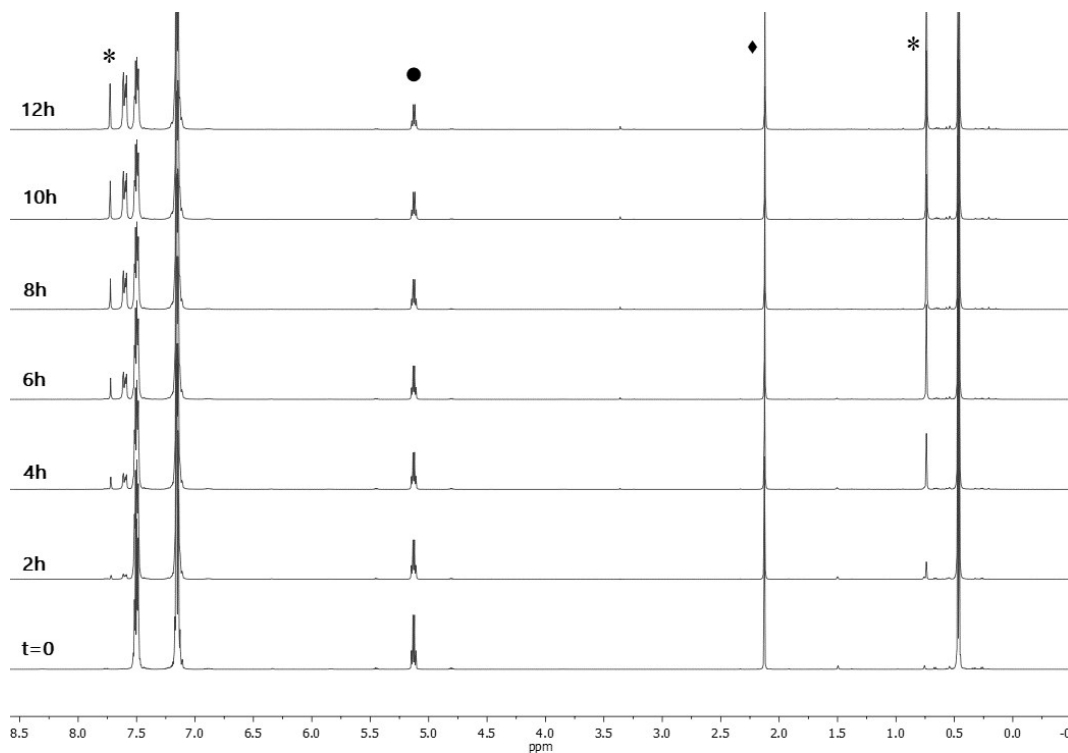

**Figure S16.** <sup>1</sup>H NMR spectra from the reaction of CO<sub>2</sub> with HSiMePh<sub>2</sub>.  
\* Silylformate ● Silane ◆ Hexamethylbenzene

| time (min) | Integral (3H) | Silane (mmol) | Integral (3H) | Silylformate (mmol) |
|------------|---------------|---------------|---------------|---------------------|
| 4          | 3.96          | 0.42          | 0.00          | 0.00                |
| 122        | 3.78          | 0.40          | 0.16          | 0.02                |
| 237        | 3.43          | 0.36          | 0.48          | 0.05                |
| 353        | 3.07          | 0.32          | 0.81          | 0.09                |
| 485        | 2.72          | 0.29          | 1.15          | 0.12                |
| 600        | 2.45          | 0.26          | 1.40          | 0.15                |
| 716        | 2.20          | 0.23          | 1.63          | 0.17                |
| 749        | 2.14          | 0.23          | 1.70          | 0.18                |
| 782        | 2.08          | 0.22          | 1.76          | 0.19                |
| 815        | 2.02          | 0.21          | 1.82          | 0.19                |

0.018 mmol of hexamethylbenzene added

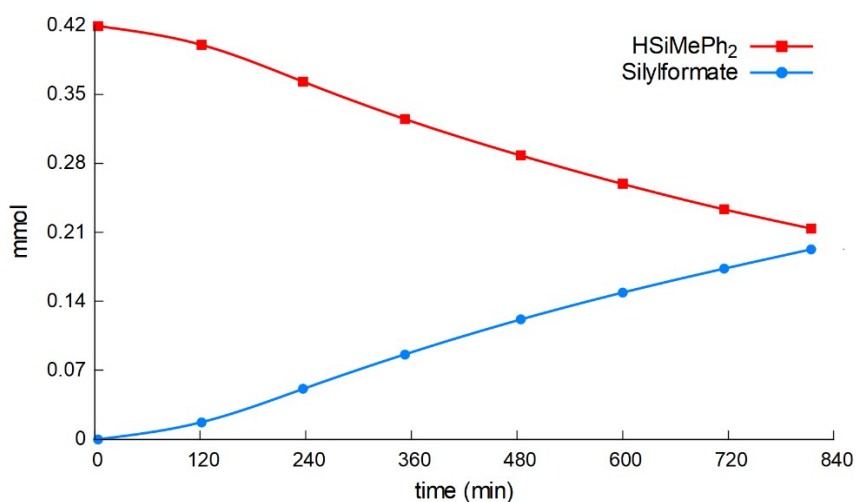

b) Using HSiMePh<sub>2</sub> as reductant.

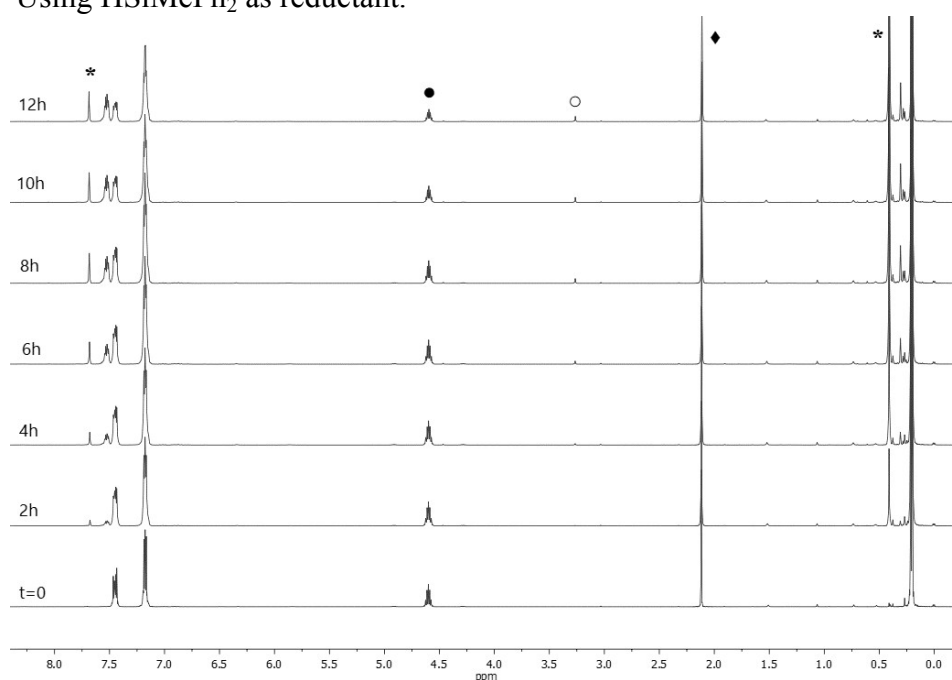

**Figure S17.** <sup>1</sup>H NMR spectra from the reaction of CO<sub>2</sub> with HSiMe<sub>2</sub>Ph.  
 \* Silylformate • Silane ◯ Methoxysilane ♦ Hexamethylbenzene

| time (min) | Integral (6H) | Silane (mmol) | Integral (6H) | Silylformate (mmol) |
|------------|---------------|---------------|---------------|---------------------|
| 2          | 6.89          | 0.42          | 0.00          | 0.00                |
| 122        | 6.11          | 0.37          | 0.64          | 0.04                |
| 237        | 5.56          | 0.34          | 1.28          | 0.08                |
| 369        | 4.86          | 0.30          | 1.96          | 0.12                |
| 485        | 4.28          | 0.26          | 2.50          | 0.15                |
| 600        | 3.75          | 0.23          | 3.02          | 0.18                |
| 716        | 3.23          | 0.20          | 3.50          | 0.21                |
| 782        | 2.99          | 0.18          | 3.73          | 0.23                |
| 815        | 2.86          | 0.17          | 3.93          | 0.24                |

0.020 mmol of hexamethylbenzene added

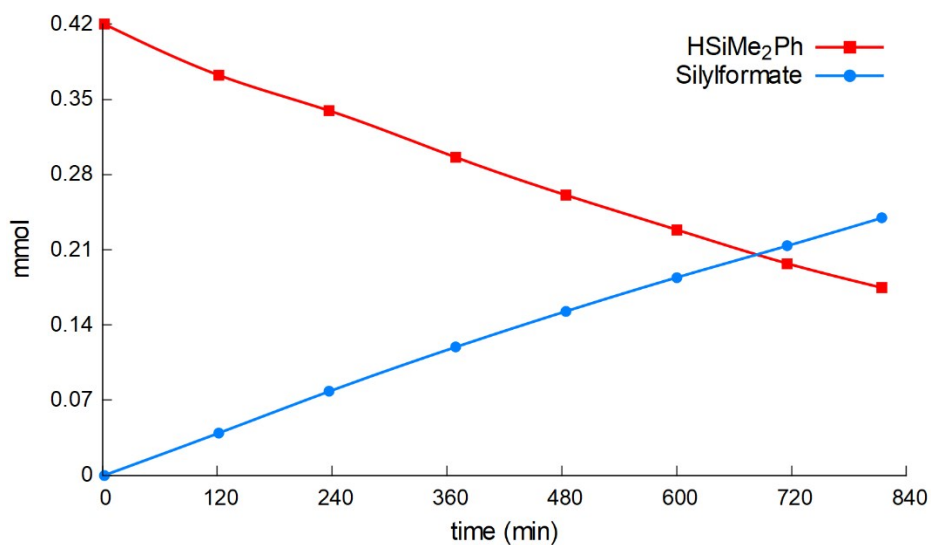

c) Using HSiMe(OSiMe<sub>3</sub>)<sub>2</sub> as reductant.

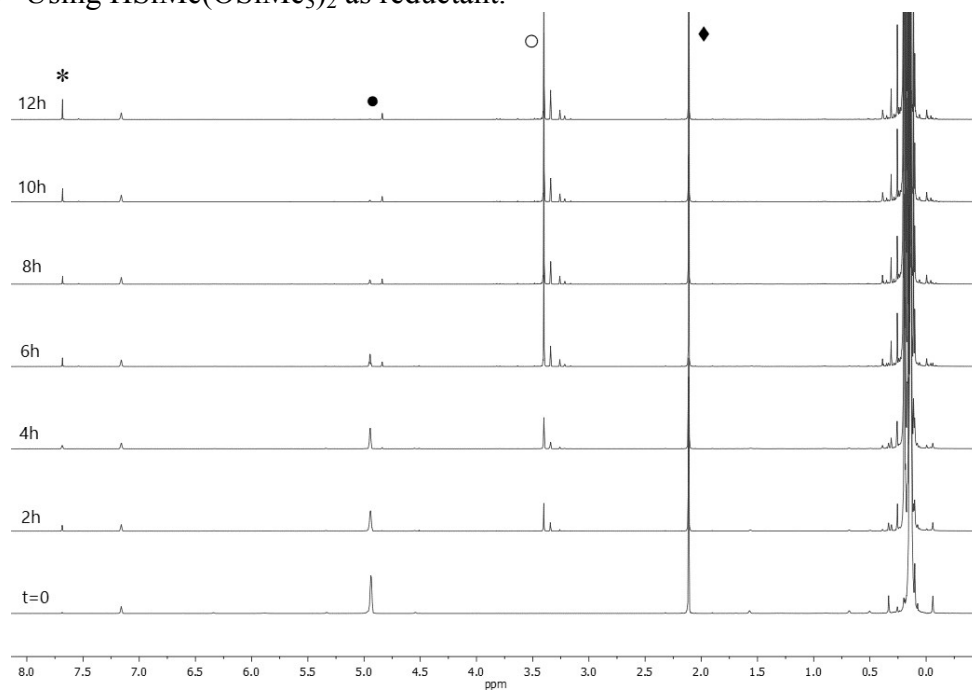

**Figure S18.** <sup>1</sup>H NMR spectra from the reaction of CO<sub>2</sub> with HSiMe(OSiMe<sub>3</sub>)<sub>2</sub>.  
 \* Silylformate • Silane ○ Methoxysilane ◆ Hexamethylbenzene

| time (min) | Integral (1H) | Silane (mmol) | Integral (1H) | Silylformate (mmol) | Integral (1H) | Methoxysilane (mmol) |
|------------|---------------|---------------|---------------|---------------------|---------------|----------------------|
| 0          | 1.22          | 0.42          | 0.01          | 0.00                | 0.00          | 0.00                 |
| 118        | 0.80          | 0.27          | 0.07          | 0.02                | 0.50          | 0.06                 |
| 234        | 0.45          | 0.16          | 0.09          | 0.03                | 0.85          | 0.10                 |
| 366        | 0.15          | 0.05          | 0.07          | 0.02                | 1.21          | 0.14                 |
| 481        | 0.05          | 0.02          | 0.08          | 0.03                | 1.31          | 0.15                 |
| 580        | 0.01          | 0.01          | 0.11          | 0.04                | 1.31          | 0.15                 |
| 646        | 0.00          | 0.00          | 0.12          | 0.04                | 1.30          | 0.15                 |

0.019 mmol of hexamethylbenzene added

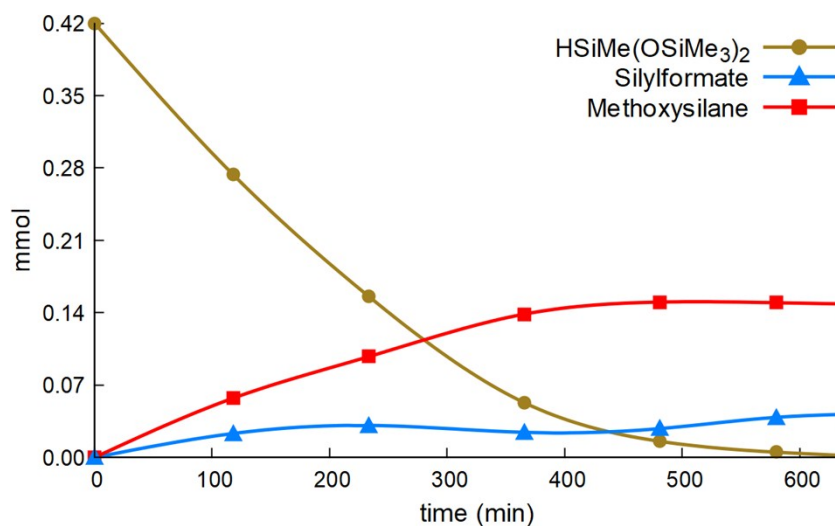

7. 3-Catalyzed (1 mol %) hydrosilylation of <sup>13</sup>CO<sub>2</sub> (2.6 bar) with HSiMe(OSiMe<sub>3</sub>)<sub>2</sub> at 298K

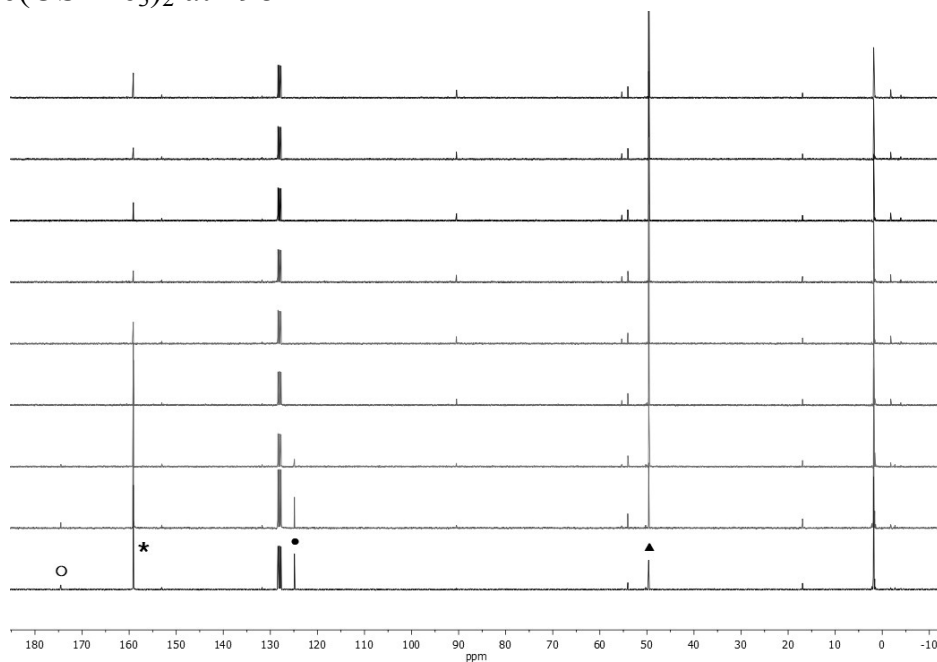

**Figure S19.** <sup>13</sup>C NMR spectra from the reaction of <sup>13</sup>CO<sub>2</sub> with HSiMe(OSiMe<sub>3</sub>)<sub>2</sub>.  
 ○ Iridium-Formate \* Silylformate • Free <sup>13</sup>CO<sub>2</sub> ▲ Methoxysilane



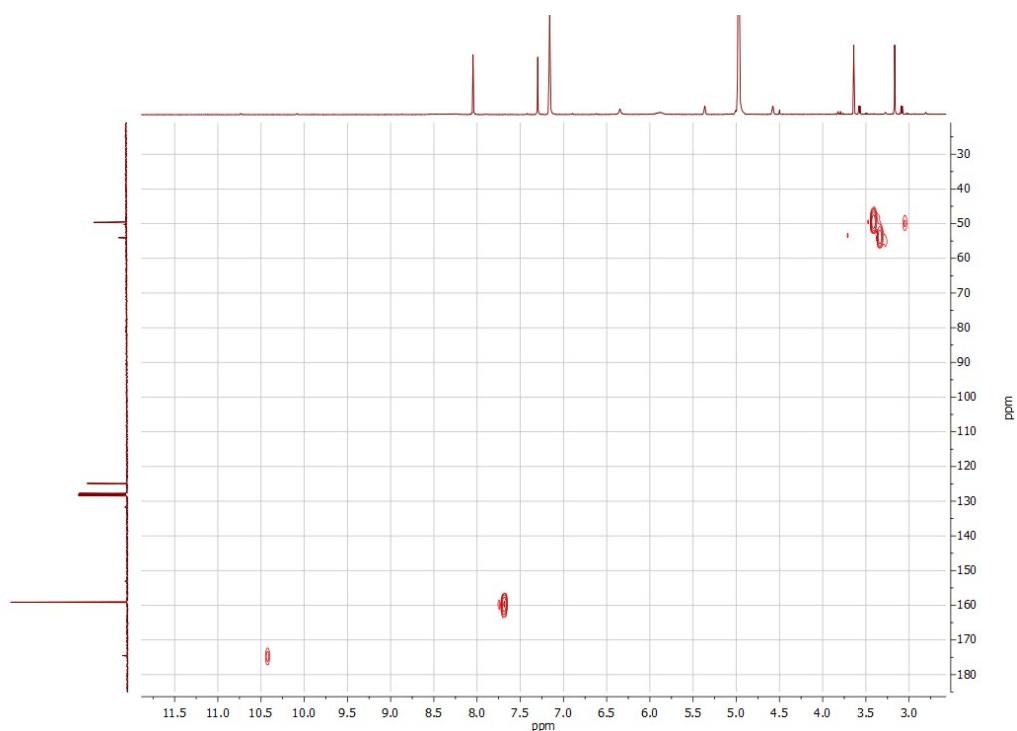

**Figure S20.**  $^1\text{H}$ - $^{13}\text{C}$  HSQC NMR spectrum from the reaction of  $^{13}\text{CO}_2$  with  $\text{HSiMe}(\text{OSiMe}_3)_2$

**8.** Selected NMR spectra of the reaction products of the **3**-catalyzed hydrosilylation of  $\text{CO}_2$  (1 bar) with  $\text{HSiMe}(\text{OSiMe}_3)_2$  in  $\text{C}_6\text{D}_6$

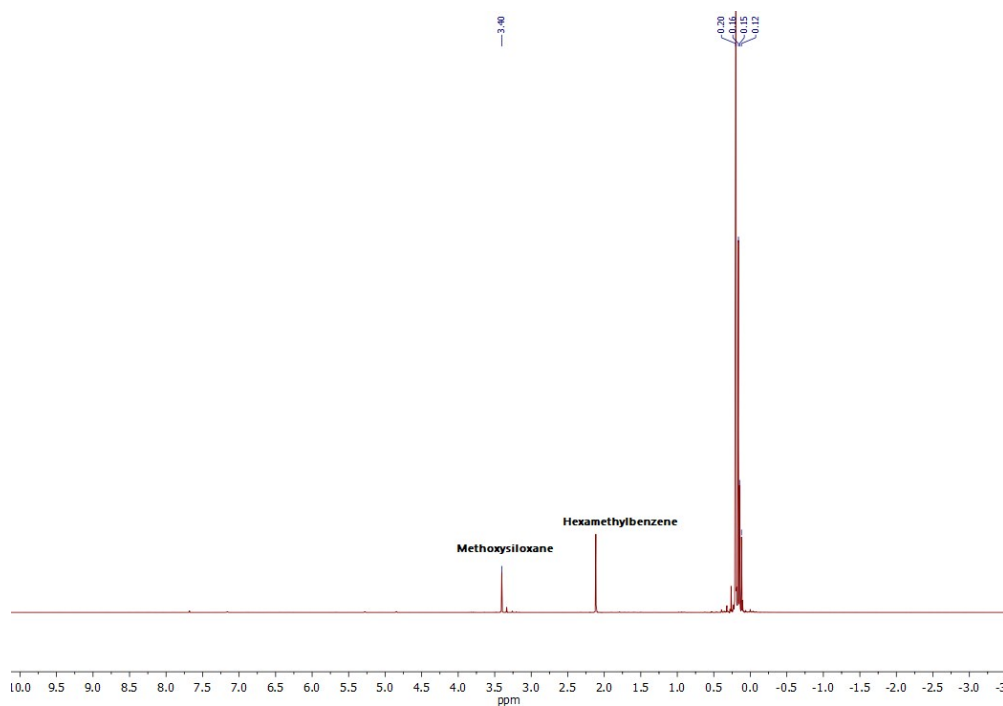

**Figure S21.**  $^1\text{H}$  NMR spectra from the reaction of  $\text{CO}_2$  with  $\text{HSiMe}(\text{OSiMe}_3)_2$

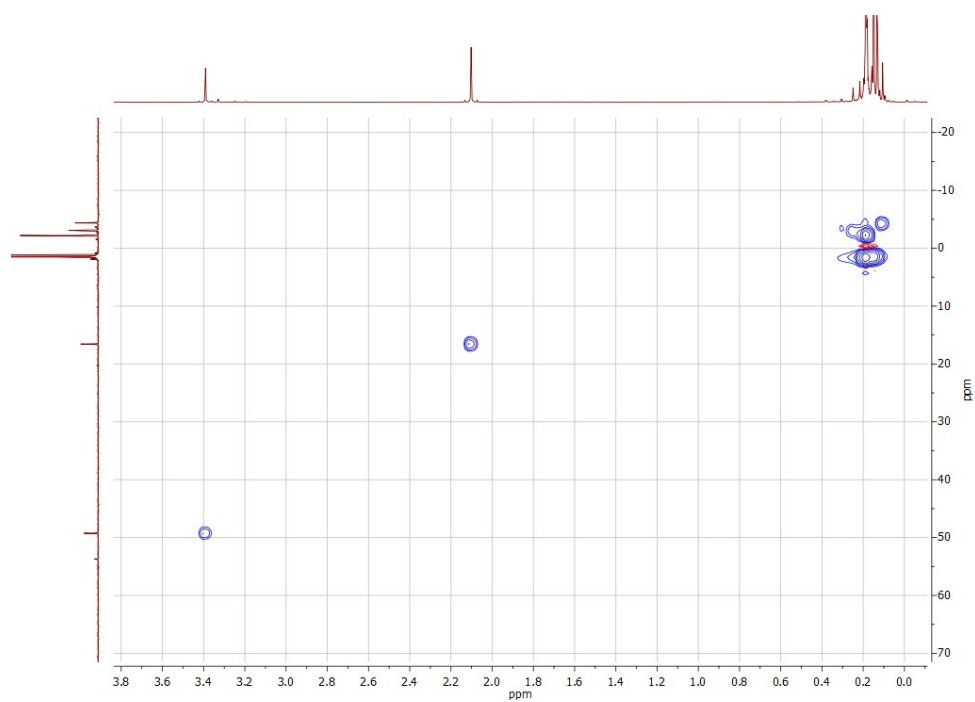

**Figure S22.**  $^1\text{H}$ - $^{13}\text{C}$  HSQC NMR spectrum from the reaction of  $\text{CO}_2$  with  $\text{HSiMe}(\text{OSiMe}_3)_2$

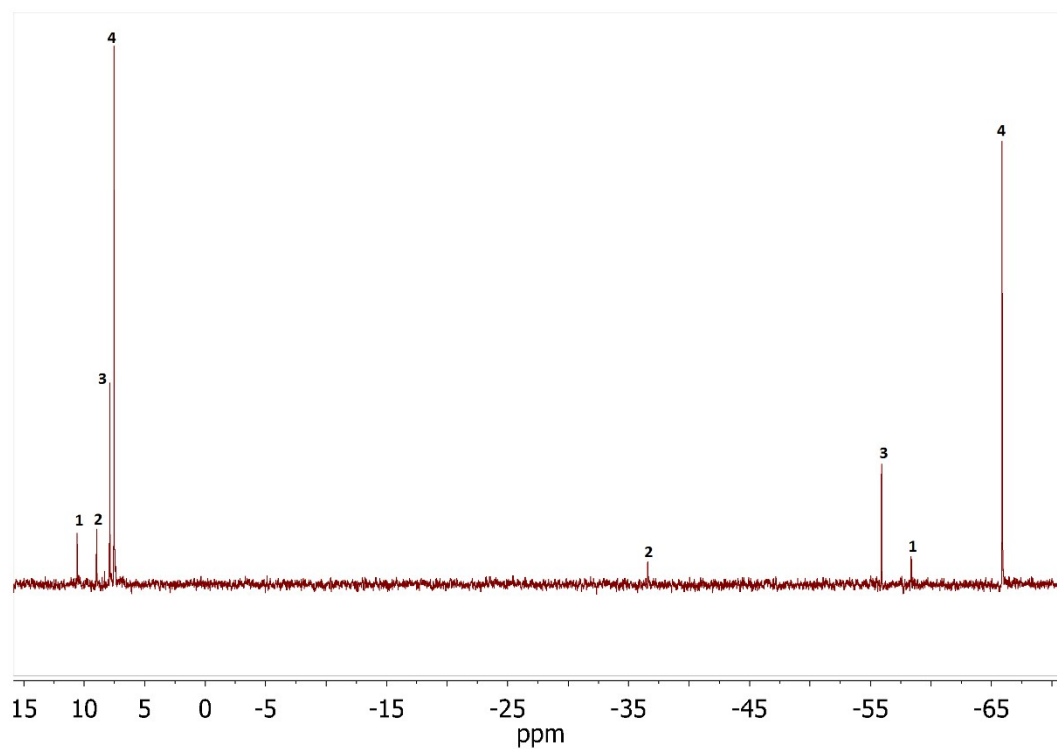

**Figure S23.**  $^{29}\text{Si}$  DEPT 45 NMR spectrum from the reaction of  $\text{CO}_2$  with  $\text{HSiMe}(\text{OSiMe}_3)_2$ : silylformate, **1**; starting  $\text{HSiMe}(\text{OSiMe}_3)_2$ , **2**; Methoxysilane **3**;  $\text{O}\{\text{SiMe}(\text{OSiMe}_3)_2\}_2$ , **4**.

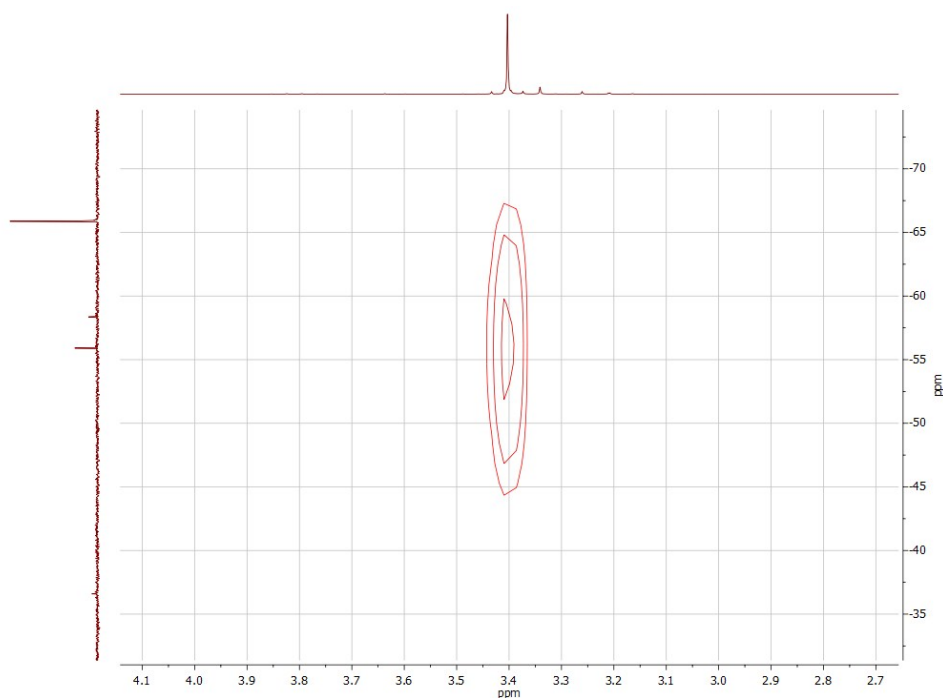

**Figure S24.**  $^1\text{H}$ - $^{29}\text{Si}$  HMBC NMR spectrum from the reaction of  $\text{CO}_2$  with  $\text{HSiMe}(\text{OSiMe}_3)_2$ . Correlation between the methoxy group and the silicon  $\text{CH}_3\text{OSiMe}(\text{OSiMe}_3)_2$ .

**9. Comparison of the catalytic activity of complex **3** (1 mol %) with 1 vs 3 bar of  $\text{CO}_2$  at RT in  $\text{C}_6\text{D}_6$**

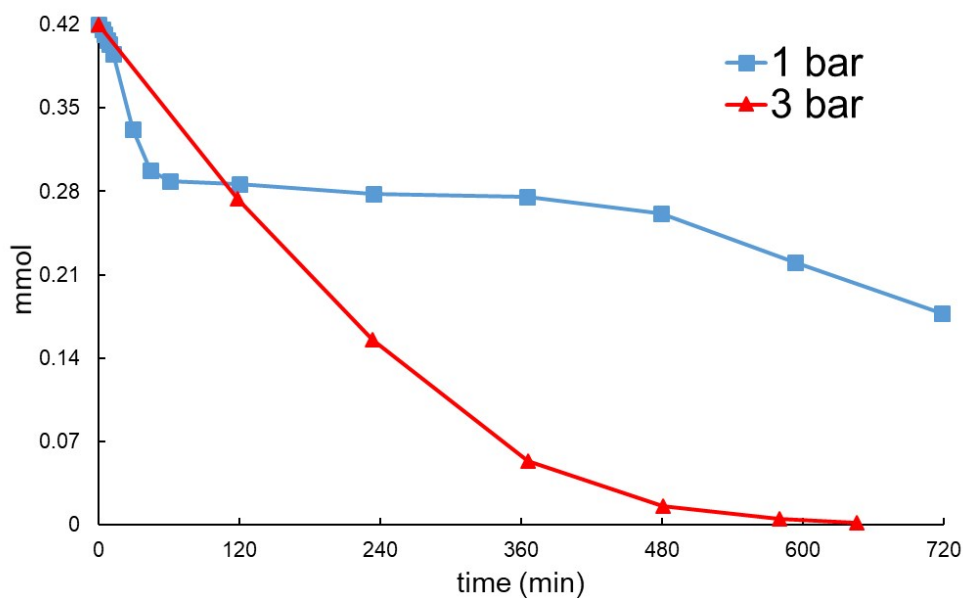

**Figure S25.** Representation of the consumption of the starting siloxane from the **3**-catalyzed (1 mol%) reaction of  $\text{HSiMe}(\text{OSiMe}_3)_2$  with  $\text{CO}_2$  (1 versus 3 bar) in  $\text{C}_6\text{D}_6$  at 298K

## 10. Comparison of the catalytic activity of complex **3** and NSiN complex

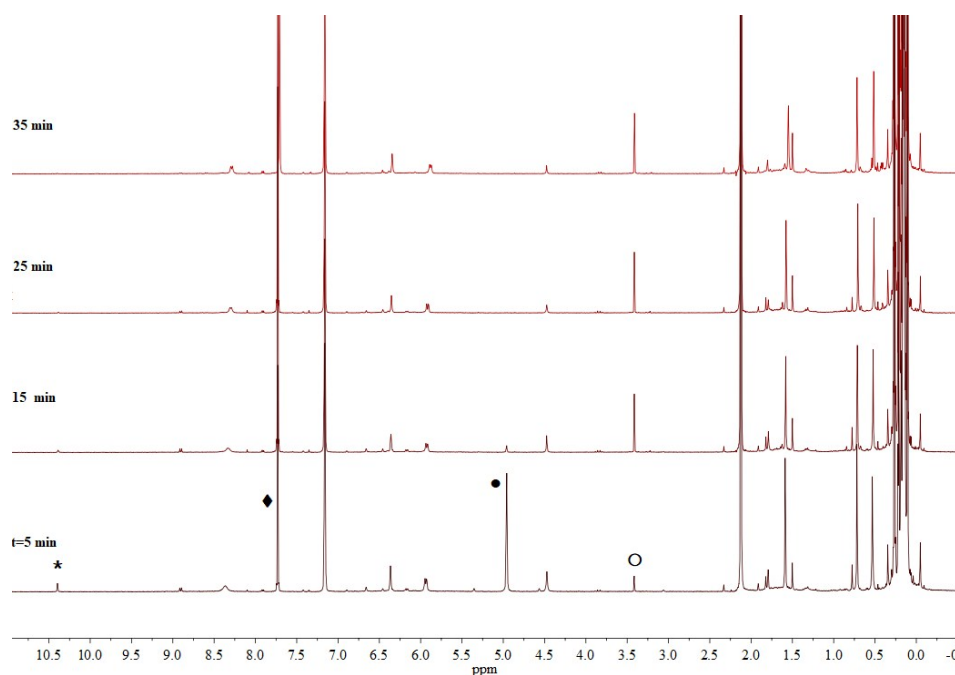

**Figure S26.** <sup>1</sup>H NMR spectra from the **3**-catalyzed (10 mol%) reaction of CO<sub>2</sub> (3 bar) with HSiMe(OSiMe<sub>3</sub>)<sub>2</sub> at 328K in C<sub>6</sub>D<sub>6</sub>. \* Iridium-formate ♦ Silylformate • Silane ○ Methoxysilane

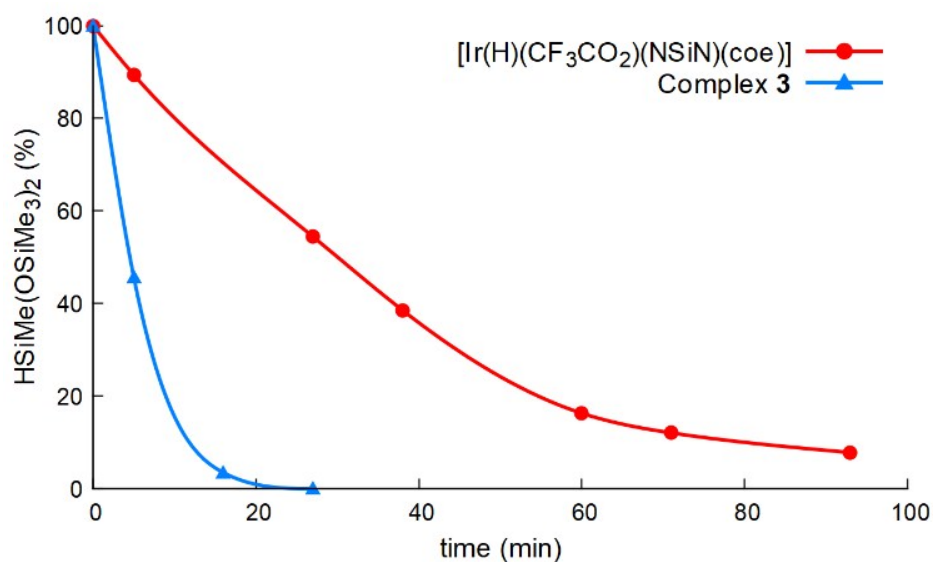

**Figure S27.** Representation of the consumption of the starting siloxane from the reaction of CO<sub>2</sub> (3 bar) with HSiMe(OSiMe<sub>3</sub>)<sub>2</sub> in C<sub>6</sub>D<sub>6</sub> at 328K in presence of catalytic amounts of complexes **3** or [Ir(H)(CF<sub>3</sub>CO<sub>2</sub>)(NSiN)(coe)] (10 mol% relative to Si-H)

## 11. Selected $^{19}\text{F}$ NMR spectra from different reactions conditions after the catalytic process

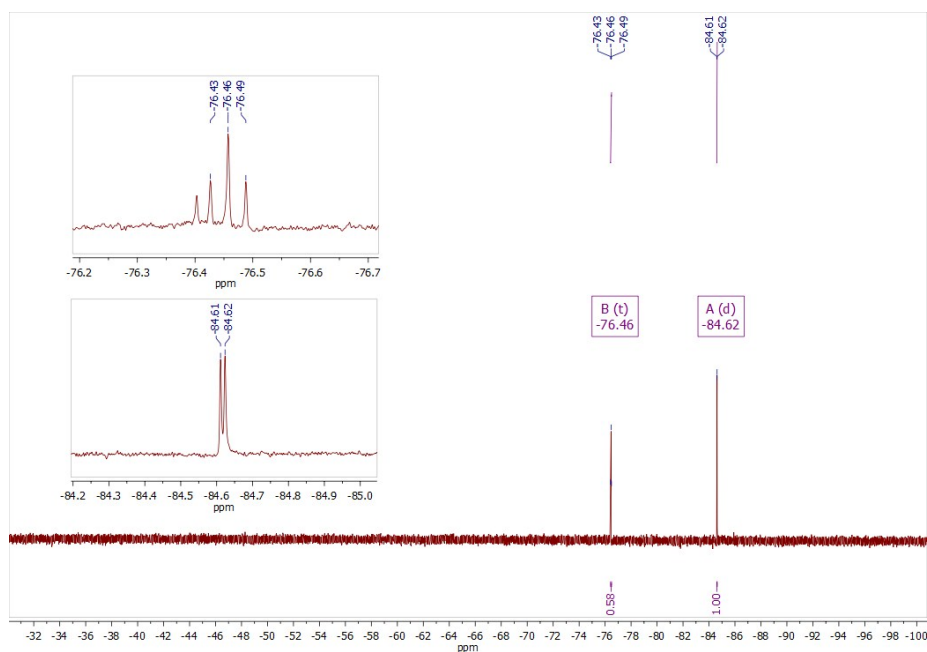

**Figure S28.**  $^{19}\text{F}$  NMR spectrum after the reaction of  $\text{CO}_2$  with  $\text{HSiMe}(\text{OSiMe}_3)_2$ .

## 12. High-Resolution Mass-Spectrum of the complexes **2** and **3**

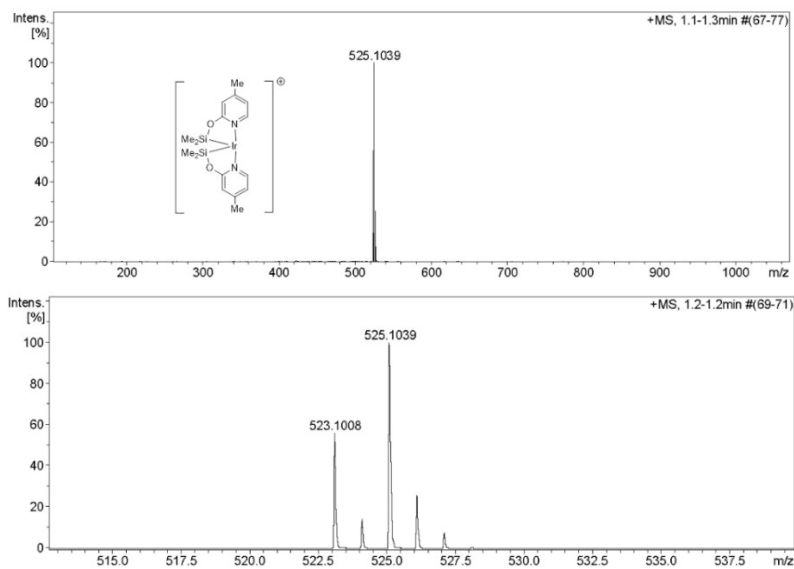

**Figure S29.** HR-MS of complex **2**

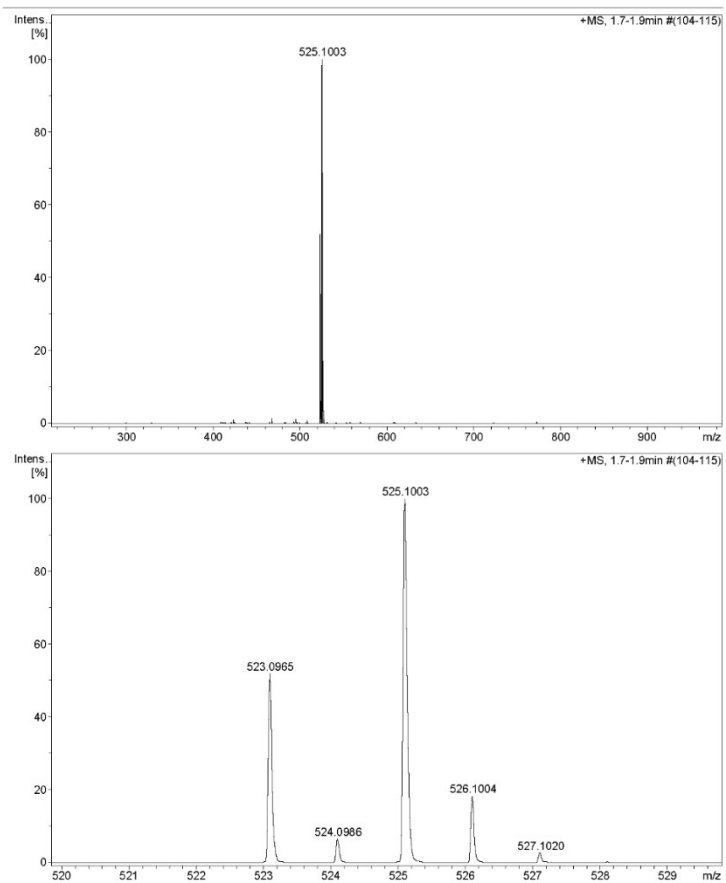

**Figure S30.** HR-MS of complex 3

### 13. DFT Calculations

Energetic values for all DFT calculated structures. Geometrical optimizations and thermochemistry corrections calculated using the def2-SVP, E(DZ), basis set. Single point energies using the def2-TZVP basis set, E(TZ). G and Gtrans are Gibbs free energy corrections calculated with and without translational contribution to the energy, correspondingly. All absolute energies in a.u. while relative energies relative to **A** and isolated molecules in kcal mol<sup>-1</sup>.

|                           | E(DZ)      | G       | Gtrans | E(TZ)      | DG(TZ)trans |
|---------------------------|------------|---------|--------|------------|-------------|
| <b>A</b>                  | -2092.9430 | 0.3317  | 0.3532 | -2094.7761 | 0           |
| <b>B</b>                  | -2502.6855 | 0.4420  | 0.4637 | -2504.7555 | -6.6        |
| <b>TSBC</b>               | -2502.6581 | 0.4455  | 0.4672 | -2504.7288 | 12.3        |
| <b>C</b>                  | -2502.6626 | 0.4437  | 0.4653 | -2504.7329 | 8.5         |
| <b>D</b>                  | -1756.1059 | 0.3251  | 0.3465 | -1757.5366 | 5.4         |
| <b>TSDE</b>               | -1756.1009 | 0.3267  | 0.3480 | -1757.5313 | 9.7         |
| <b>E</b>                  | -1756.1504 | 0.3343  | 0.3557 | -1757.5772 | -14.3       |
| <b>F</b>                  | -2165.8879 | 0.4438  | 0.4653 | -2167.5532 | -19.4       |
| <b>TSFG</b>               | -2165.8617 | 0.4480  | 0.4695 | -2167.5277 | -0.7        |
| <b>G</b>                  | -2165.8742 | 0.4429  | 0.4644 | -2167.5429 | -13.5       |
| <b>D'</b>                 | -1756.1059 | 0.3251  | 0.3465 | -1757.2115 | -16.8       |
| <b>TSDE'</b>              | -1756.1009 | 0.3267  | 0.3480 | -1757.2046 | -12.5       |
| <b>E'</b>                 | -1756.1504 | 0.3343  | 0.3557 | -1757.2429 | -36.5       |
| <b>TSGH</b>               | -2165.8654 | 0.4424  | 0.4639 | -2167.5364 | -9.7        |
| <b>H</b>                  | -2165.8932 | 0.4485  | 0.4700 | -2167.5623 | -22.1       |
| <b>I</b>                  | -2575.6287 | 0.5571  | 0.5787 | -2577.5374 | -27.2       |
| <b>TSIJ</b>               | -2575.6244 | 0.5609  | 0.5826 | -2577.5341 | -22.7       |
| <b>J</b>                  | -2575.6389 | 0.5590  | 0.5806 | -2577.5511 | -34.5       |
| <b>TSJK</b>               | -2985.3210 | 0.6699  | 0.6917 | -2987.4803 | -9.3        |
| <b>K</b>                  | -2461.1900 | 0.5296  | 0.5512 | -2462.9687 | -65.9       |
| <b>TSKD</b>               | -2461.1761 | 0.5321  | 0.5537 | -2462.9544 | -55.3       |
| <b>D''+ O(SiMe3)2</b>     | -2280.3202 | 0.4421  | 0.4823 | -2282.1338 | -75.9       |
| <b>TSJM</b>               | -2575.6008 | 0.5615  | 0.5832 | -2577.5086 | -6.3        |
| <b>TSIM</b>               | -2575.5902 | 0.5595  | 0.5811 | -2577.5037 | -4.5        |
| <b>M</b>                  | -1682.0978 | 0.3483  | 0.3696 | -1683.4407 | -38.7       |
| <b>J<sub>OMe</sub></b>    | -2876.4169 | 0.5813  | 0.6031 | -2878.7050 | -44.9       |
| <b>TSJK<sub>OMe</sub></b> | -3436.4859 | 0.6942  | 0.7162 | -3439.2080 | -27.6       |
| <b>CO2</b>                | -188.4447  | -0.0089 | 0.0088 | -188.6715  |             |
| <b>SiHMe3</b>             | -409.7222  | 0.0879  | 0.1064 | -409.9647  |             |
| <b>SiHMe(OMe)2</b>        | -560.0962  | 0.0933  | 0.1123 | -560.5299  |             |
| <b>CF3CO2SiMe3</b>        | -934.9880  | 0.0977  | 0.1175 | -935.8627  |             |
| <b>CF3CO2SiMe(OMe)2</b>   | -1085.3676 | 0.1049  | 0.1249 | -1086.4332 |             |
| <b>O(SiMe3)2</b>          | -893.5273  | 0.1843  | 0.2038 | -894.1098  |             |
| <b>CH2(OSiMe3)2</b>       | -1007.9632 | 0.2125  | 0.2323 | -1008.6764 |             |
| <b>HCO2SiMe3</b>          | -598.2068  | 0.1066  | 0.1166 | -598.6730  |             |
| <b>CH3OSiMe3</b>          | -524.2143  | 0.1170  | 0.1359 | -524.5972  |             |

## 14. Other mechanistic alternatives for conversion of **I** and **J**

Path a) **TSJK**,  $S_N2$  nucleophilic attack of hydride to the carbon atom of bis(silyl)acetal.

Path b) **TSIM**, concerted silyl transfer from silane to the oxygen lone pair while the C-O bond is broken forming formaldehyde and bis(silyl)ether intermediate (**M**).

Path c) **TSJM** 1,2-elimination of bis(silyl)ether through transition state

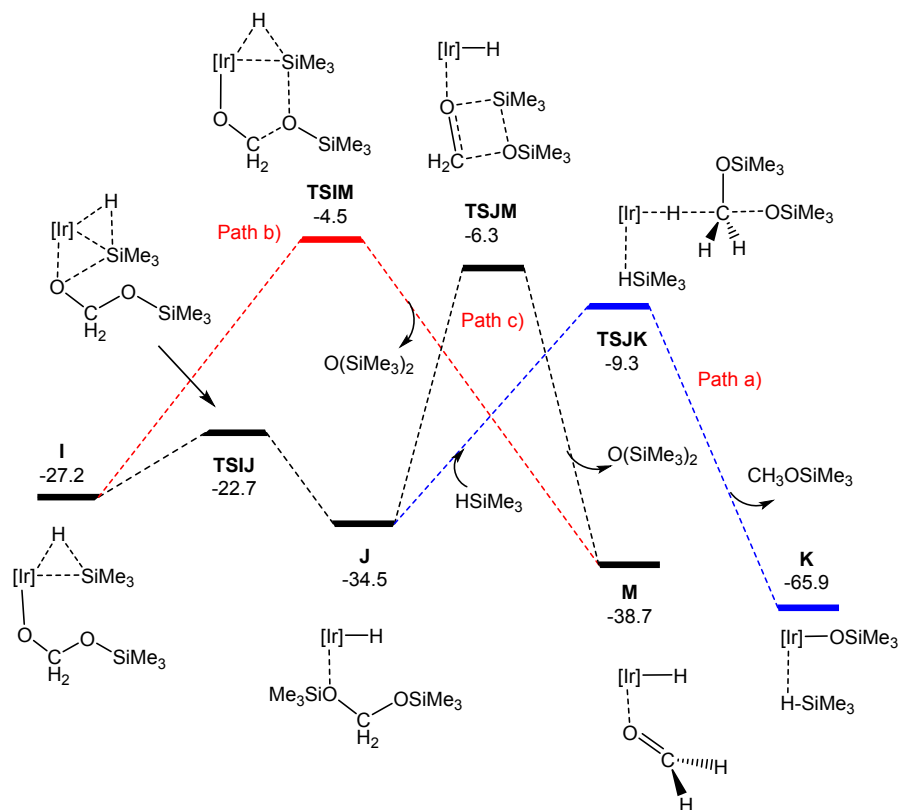

**Figure S31.** Other mechanistic alternatives for the conversion of **I** and **J**.



15. Comparison between Gibbs free energy profiles to the methoxysilane product step using HSiMe<sub>3</sub> and HSiMe(OMe)<sub>2</sub> silanes

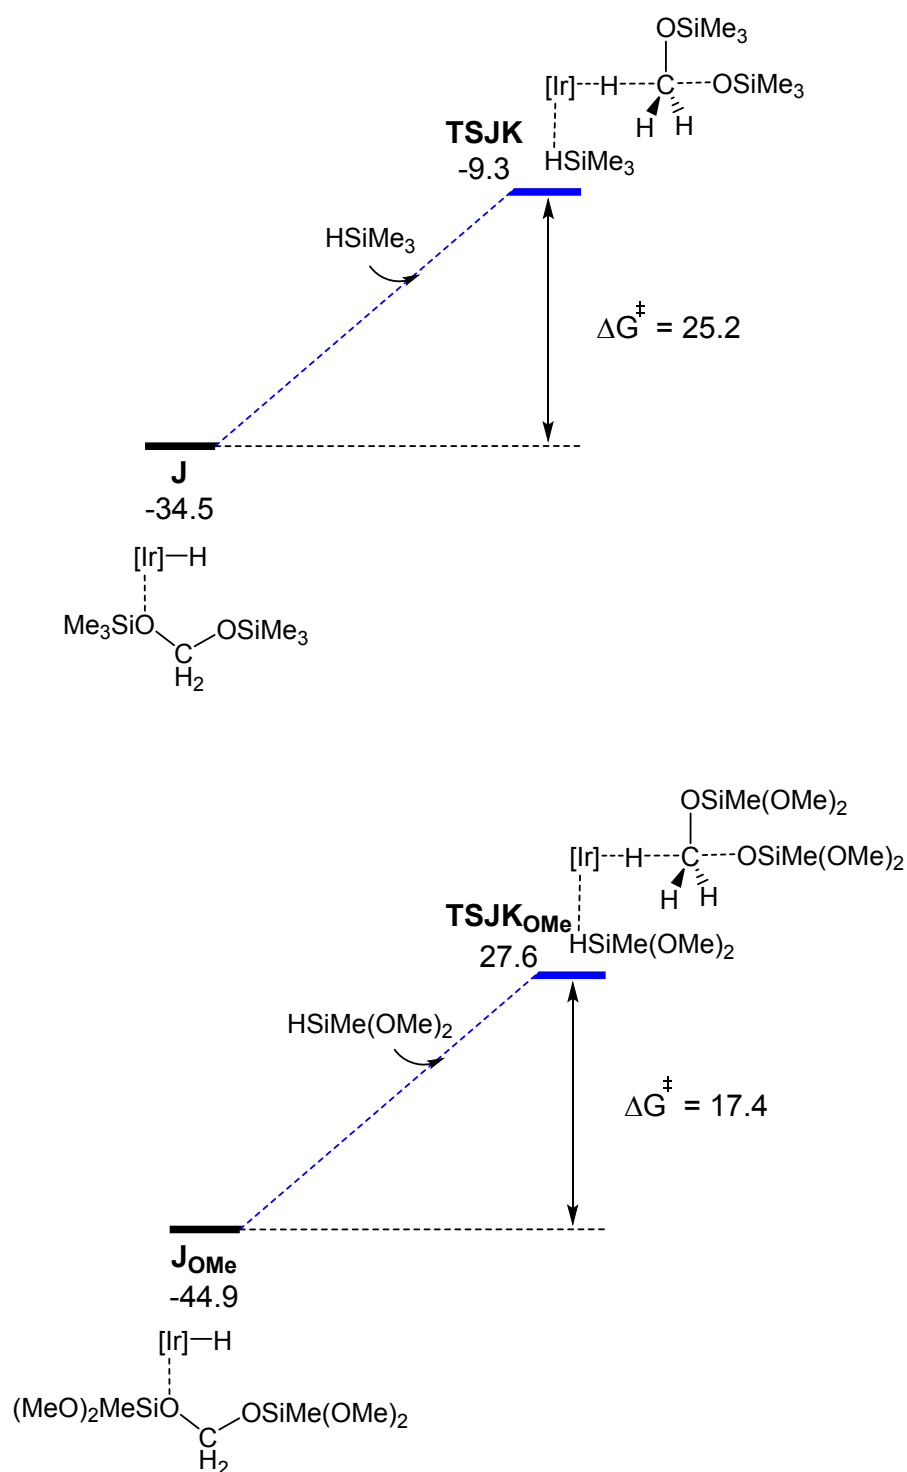

**Figure S32.** Comparison between Gibbs free energy profiles (in kcal mol<sup>-1</sup>, relative to **A** and isolated molecules) for the key step leading to the methoxysilane, calculated using HSiMe<sub>3</sub> and HSiMe(OMe)<sub>2</sub> silanes.

## 16. Full citation for the G09 program

Gaussian 09, Revision D.01, M. J. Frisch, G. W. Trucks, H. B. Schlegel, G. E. Scuseria, M. A. Robb, J. R. Cheeseman, G. Scalmani, V. Barone, G. A. Petersson, H. Nakatsuji, X. Li, M. Caricato, A. Marenich, J. Bloino, B. G. Janesko, R. Gomperts, B. Mennucci, H. P. Hratchian, J. V. Ortiz, A. F. Izmaylov, J. L. Sonnenberg, D. Williams-Young, F. Ding, F. Lipparini, F. Egidi, J. Goings, B. Peng, A. Petrone, T. Henderson, D. Ranasinghe, V. G. Zakrzewski, J. Gao, N. Rega, G. Zheng, W. Liang, M. Hada, M. Ehara, K. Toyota, R. Fukuda, J. Hasegawa, M. Ishida, T. Nakajima, Y. Honda, O. Kitao, H. Nakai, T. Vreven, K. Throssell, J. A. Montgomery, Jr., J. E. Peralta, F. Ogliaro, M. Bearpark, J. J. Heyd, E. Brothers, K. N. Kudin, V. N. Staroverov, T. Keith, R. Kobayashi, J. Normand, K. Raghavachari, A. Rendell, J. C. Burant, S. S. Iyengar, J. Tomasi, M. Cossi, J. M. Millam, M. Klene, C. Adamo, R. Cammi, J. W. Ochterski, R. L. Martin, K. Morokuma, O. Farkas, J. B. Foresman, and D. J. Fox, Gaussian, Inc., Wallingford CT, 2016

## 17. Geometrical Representation of all DFT optimized structures

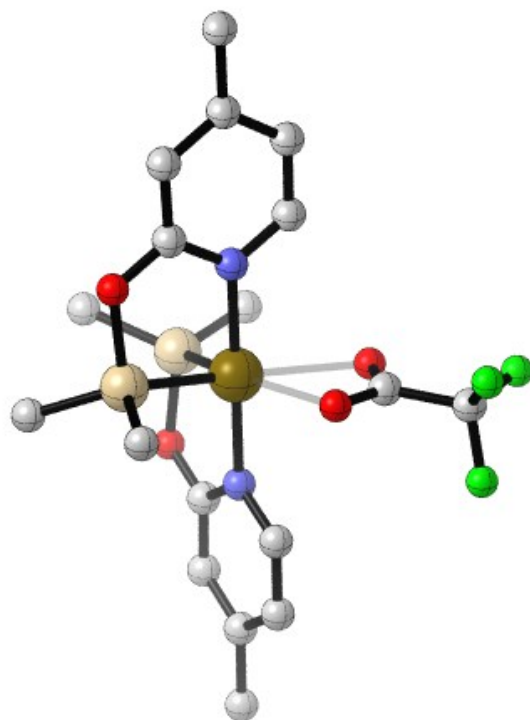

**A**

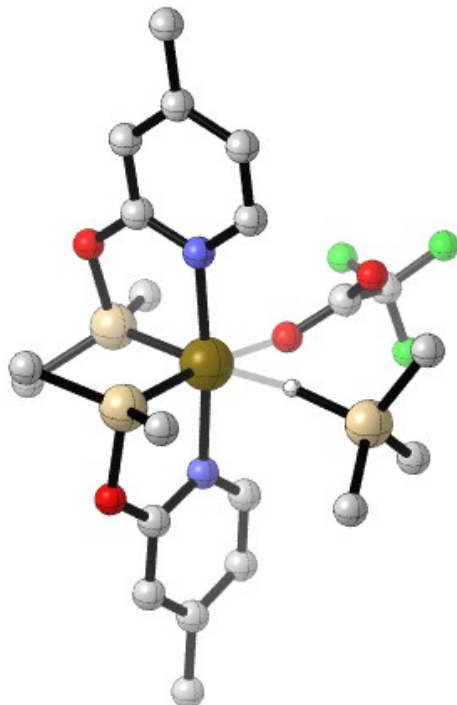

**B**

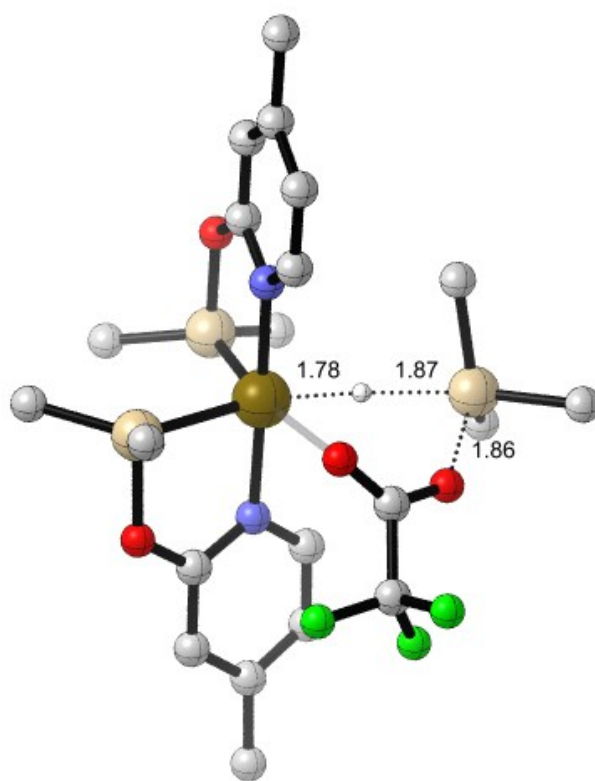

TSBC

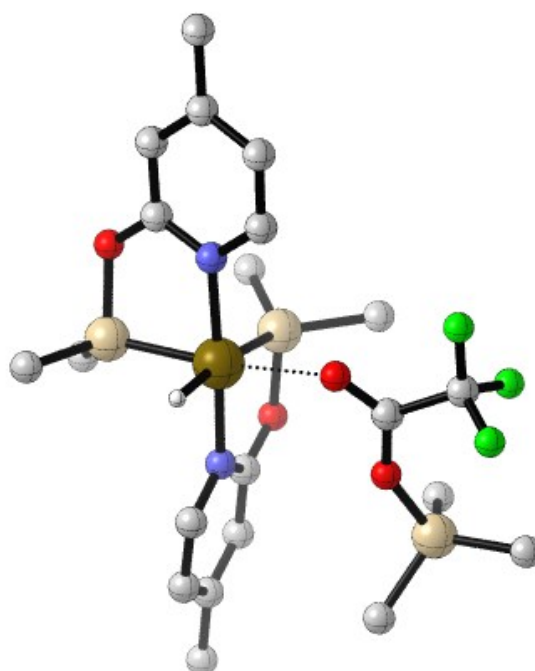

C

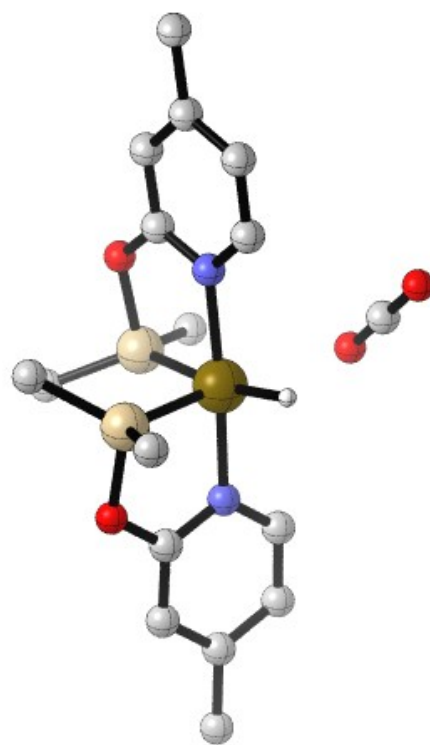

**D**

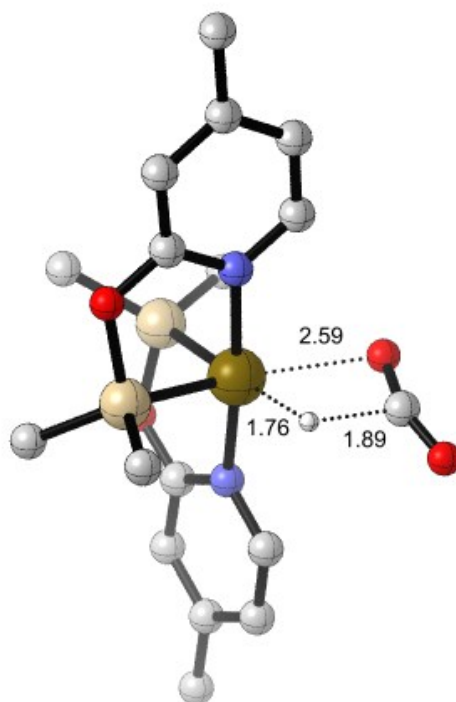

**TSDE**

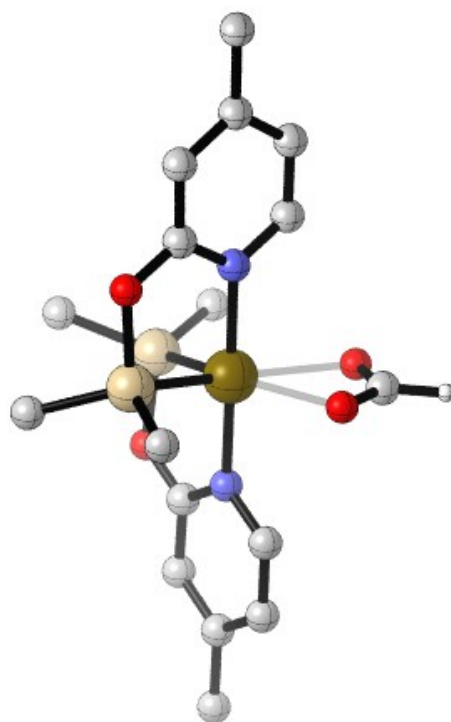

**E**

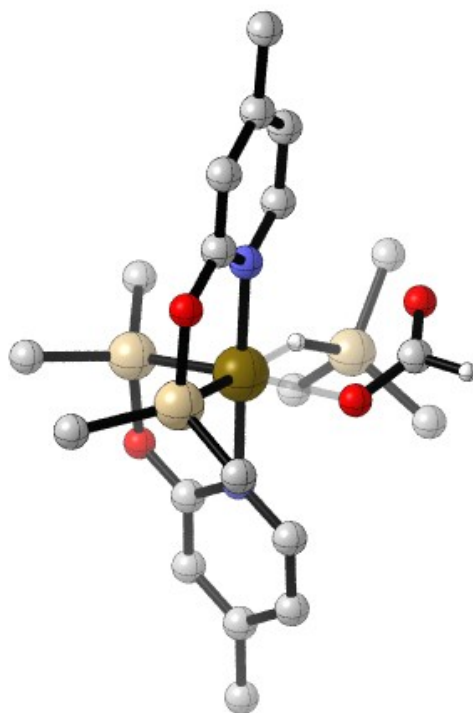

**F**

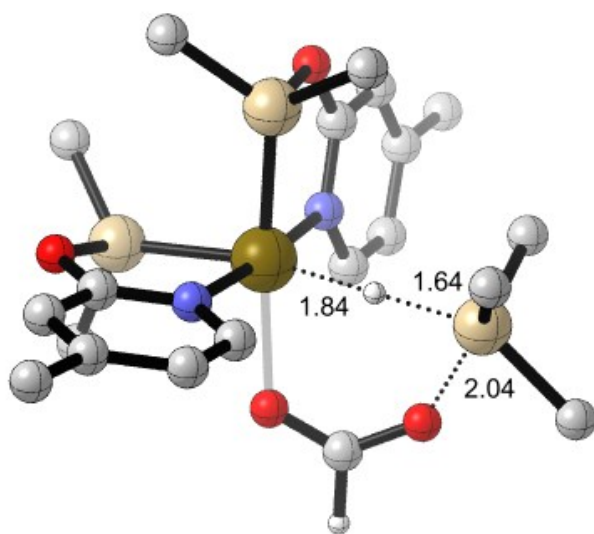

**TSG**

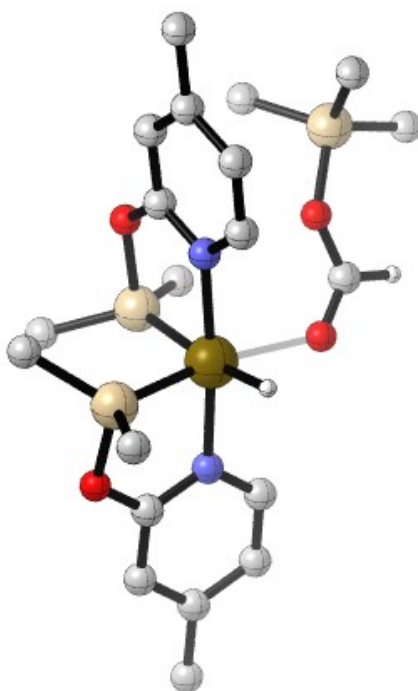

**G**

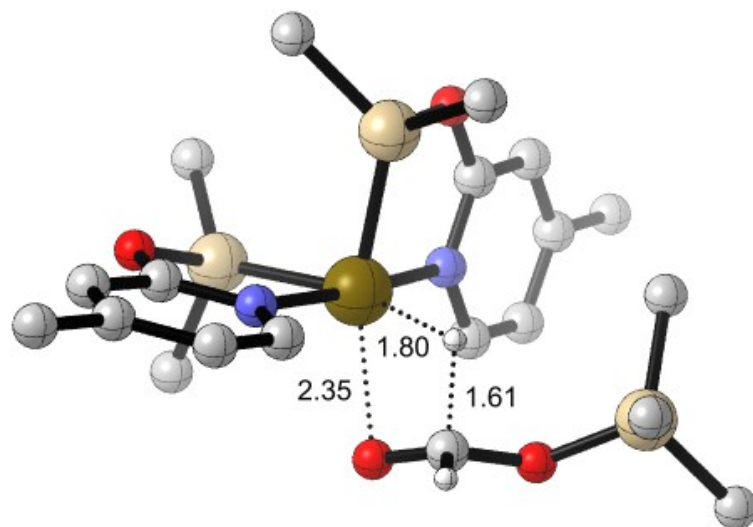

**TSGH**

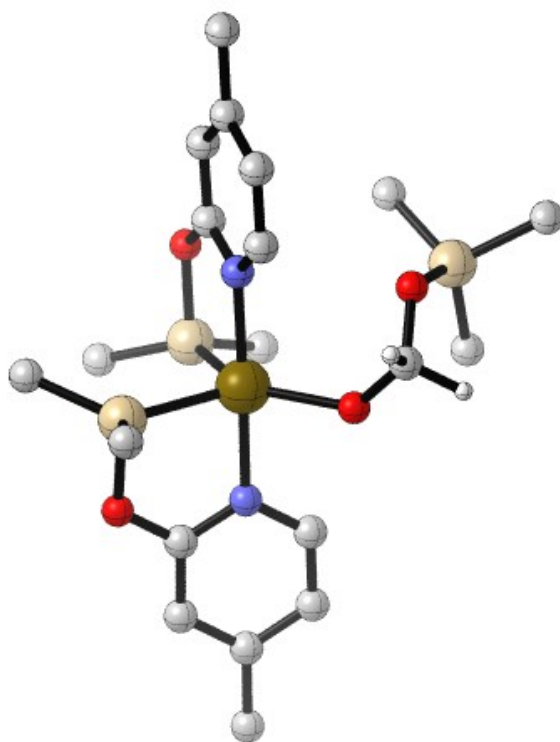

**H**



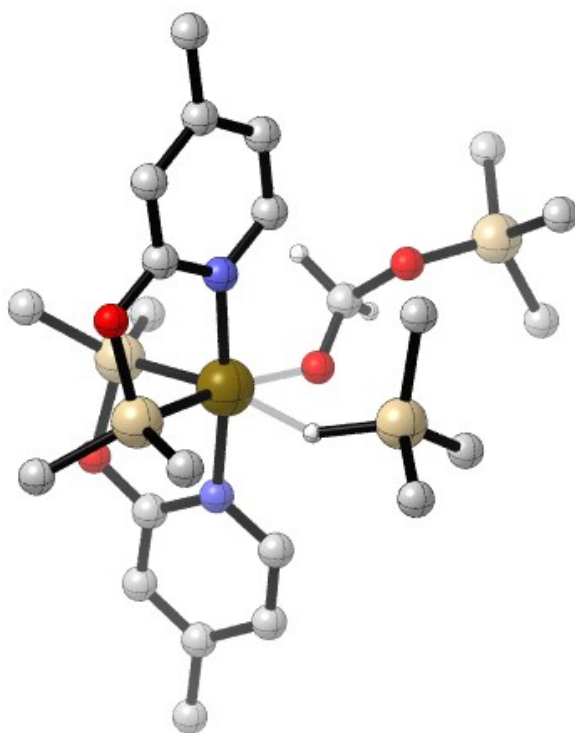

**I**

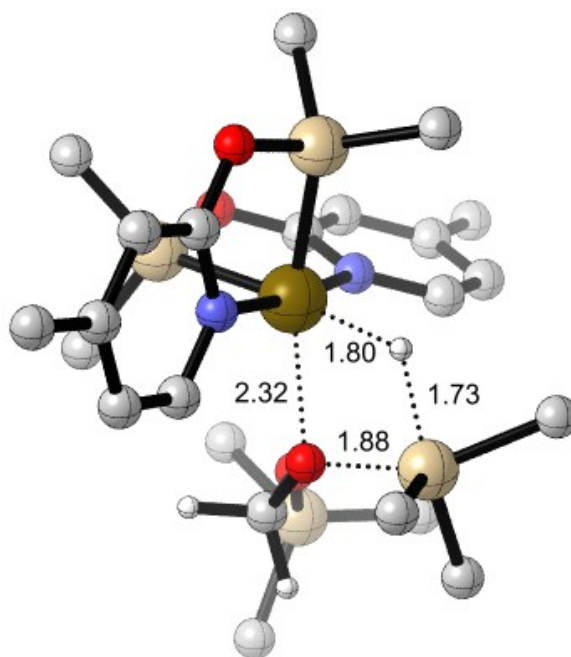

**TSIJ**

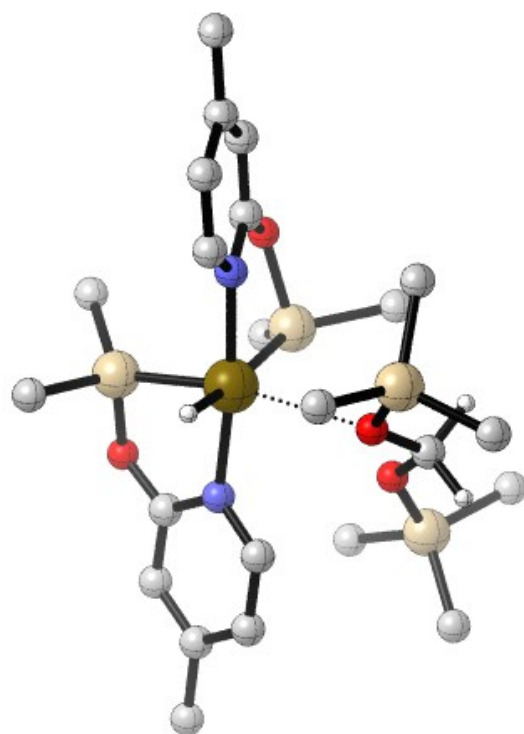

**J**

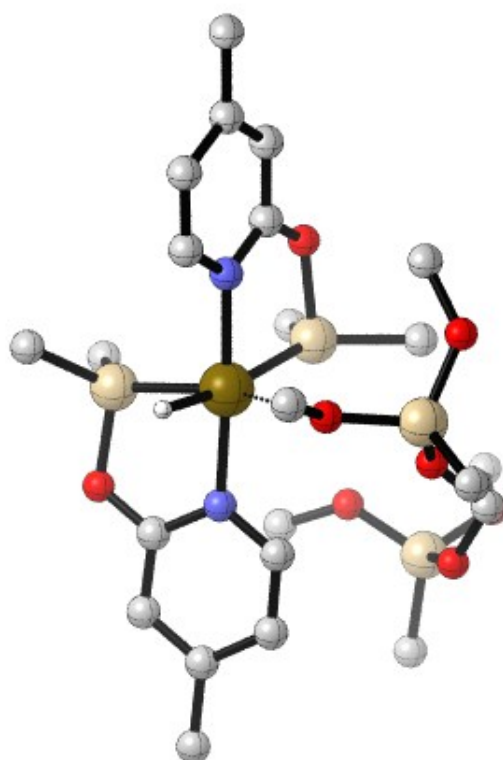

**J<sub>OMe</sub>**

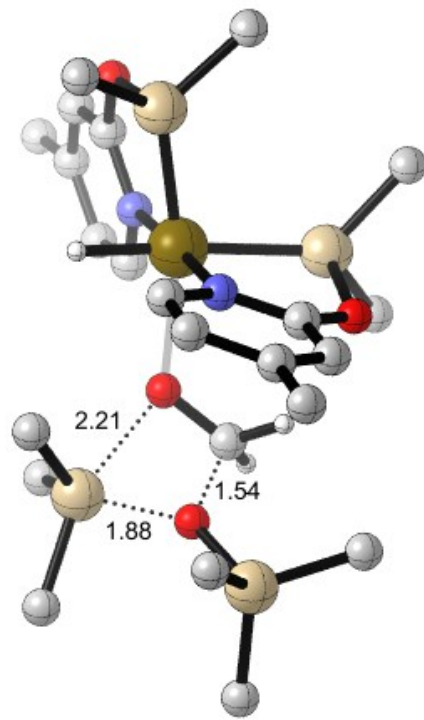

**TSJM**

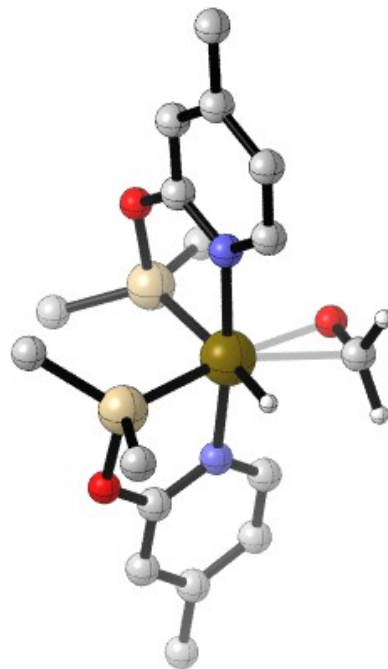

**M**

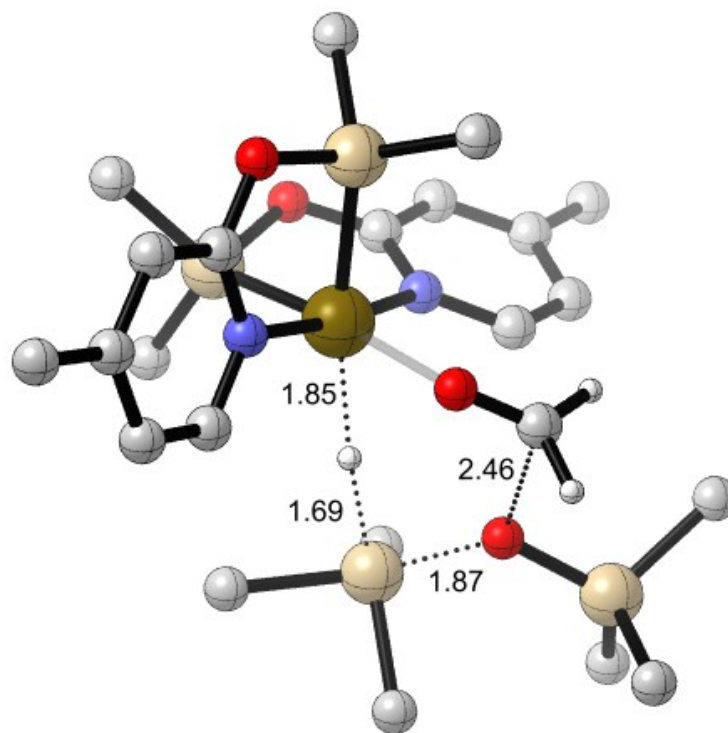

**TSIM**

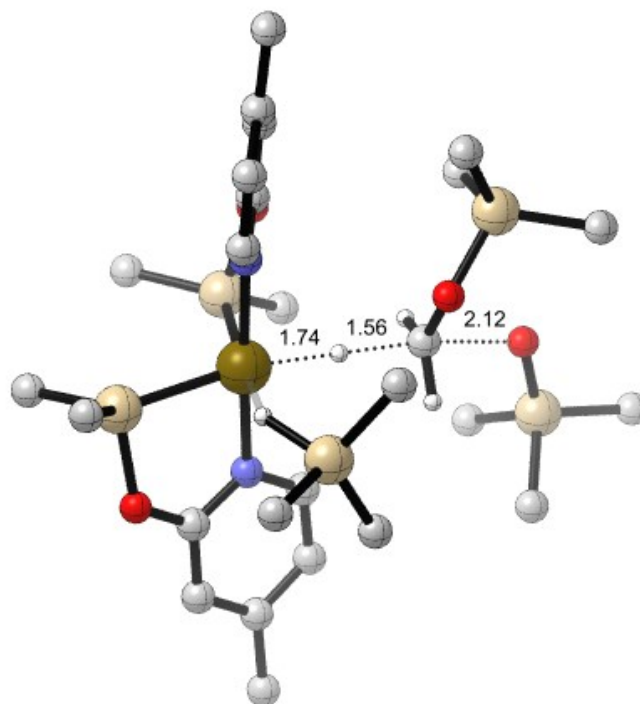

**TSJK**

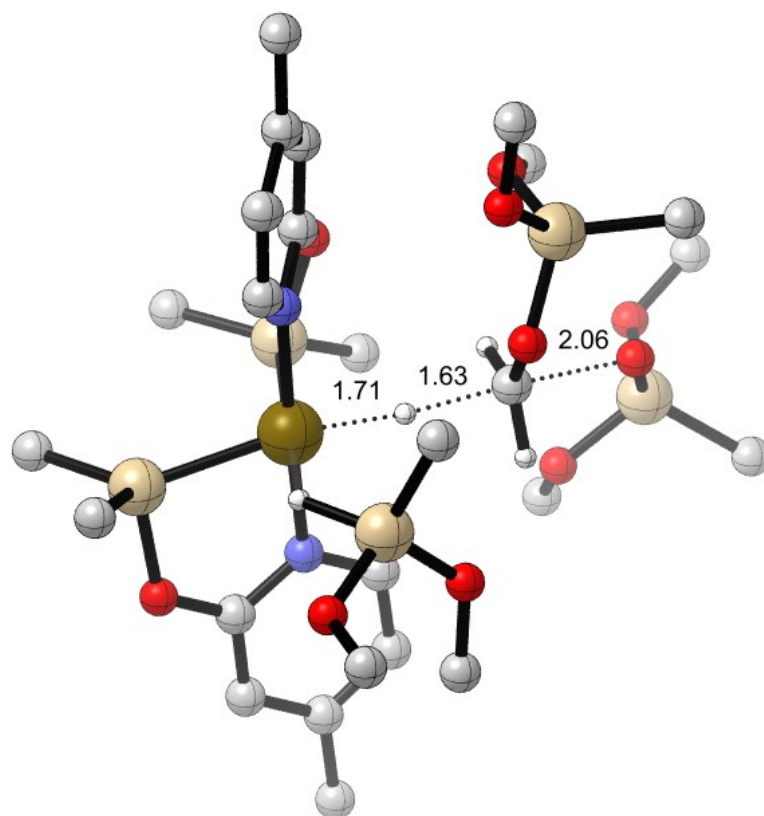

TSJK<sub>OMe</sub>

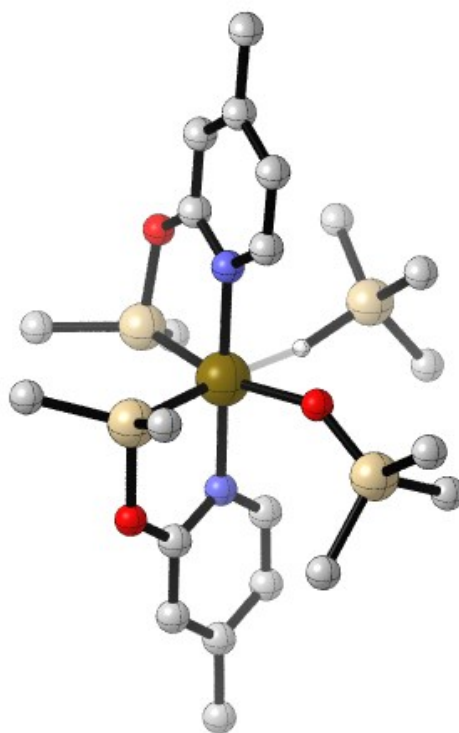

K

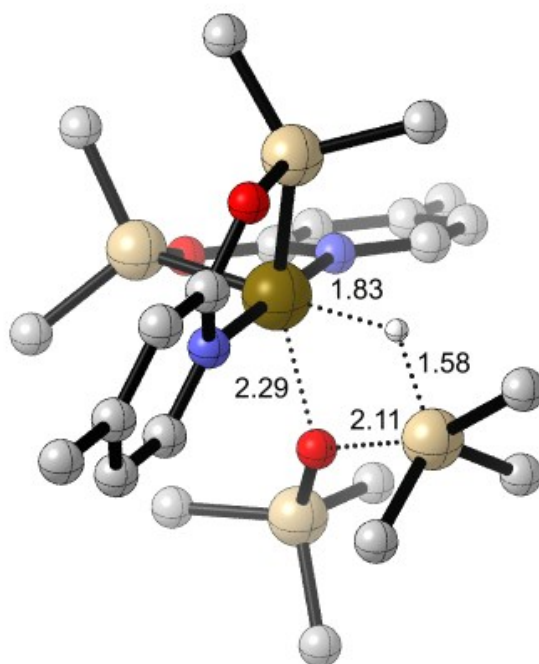

**TSKD**

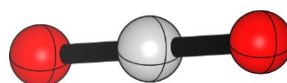

**CO2**

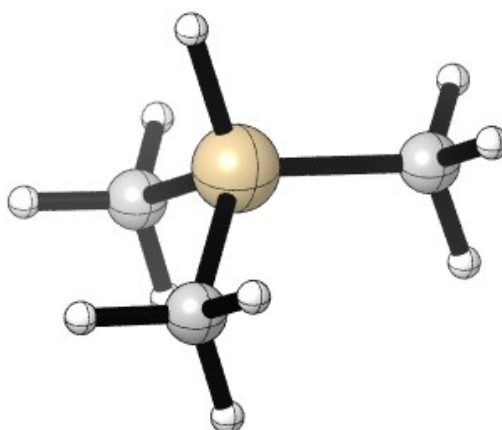

**SiHMe3**

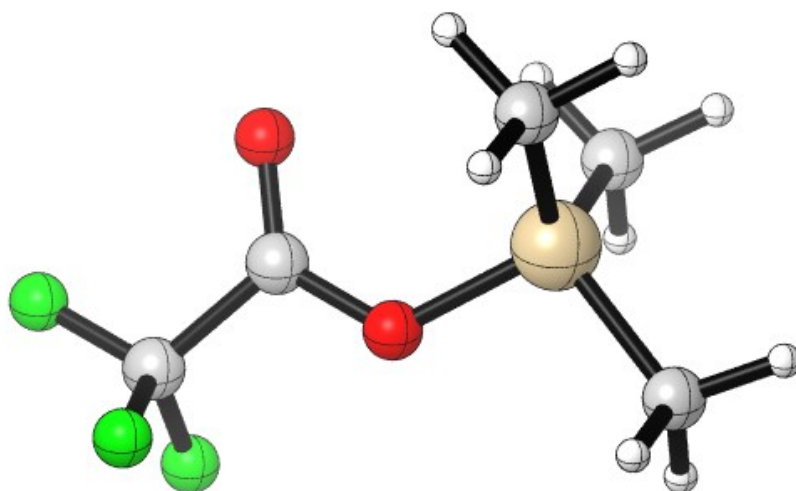

**CF<sub>3</sub>CO<sub>2</sub>SiMe<sub>3</sub>**

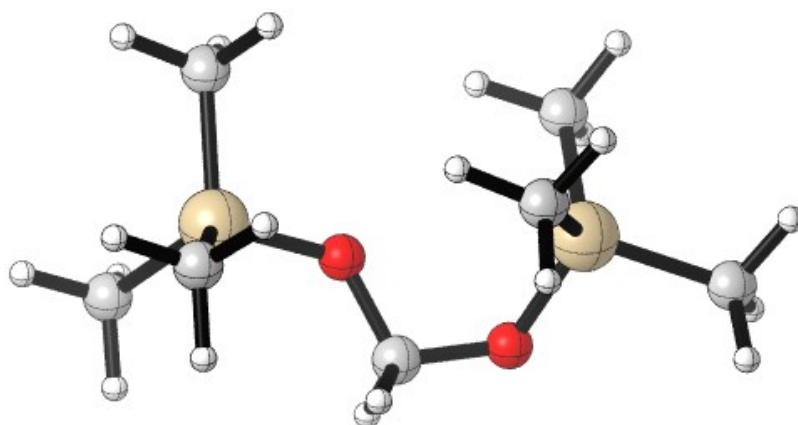

**O(SiMe<sub>3</sub>)<sub>2</sub>**

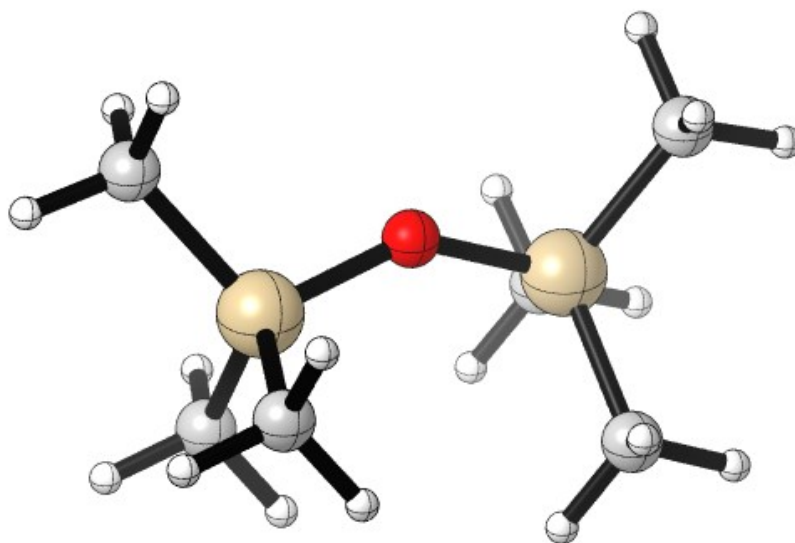

**CH<sub>2</sub>(OSiMe<sub>3</sub>)<sub>2</sub>**

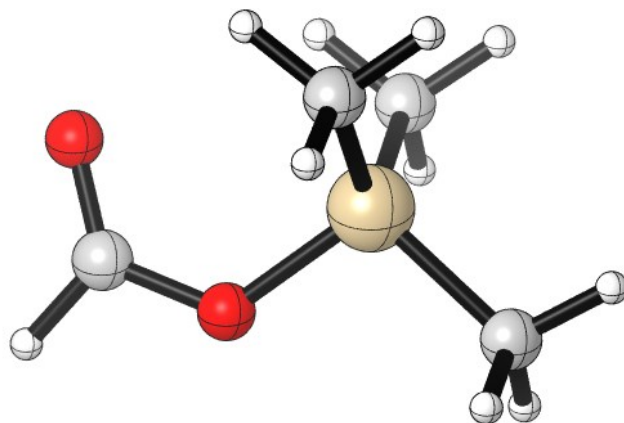

**HCO<sub>2</sub>SiMe<sub>3</sub>**

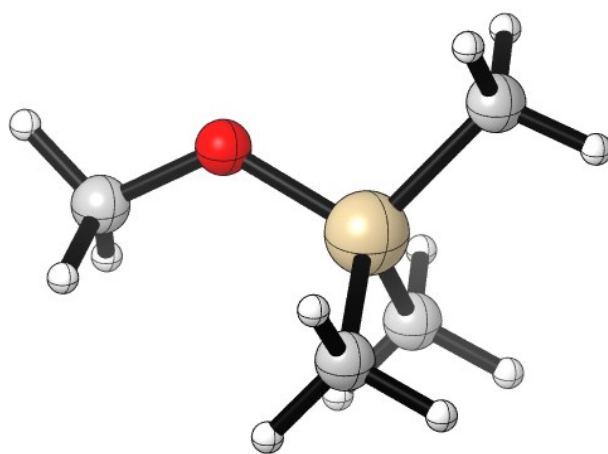

**CH<sub>3</sub>OSiMe<sub>3</sub>**



## 18. Cartesian coordinates (xyz, in Å) for all DFT optimized structures.

|              |             |           |              |
|--------------|-------------|-----------|--------------|
| <b>A</b>     | 6 -0.839445 | 2.601303  | -0.453521    |
| 77 -0.041908 | -0.181191   | -0.007979 | 6 -0.803843  |
| 14 0.210264  | -1.783073   | -1.608265 | 9 0.457974   |
| 14 -0.454817 | -1.670765   | 1.663142  | 9 -1.588715  |
| 9 -0.418673  | 4.661253    | 0.852493  | 9 -1.184889  |
| 9 1.665656   | 4.280476    | 0.380106  | 7 2.075512   |
| 9 0.229788   | 4.613315    | -1.211512 | 6 2.706990   |
| 8 1.955762   | -2.065520   | -1.433666 | 6 2.797606   |
| 8 -2.224183  | -1.750887   | 1.520212  | 6 4.068934   |
| 8 0.021552   | 1.957600    | 1.068017  | 1 2.051946   |
| 8 0.144827   | 1.943509    | -1.150643 | 6 4.191207   |
| 7 2.035107   | -0.297372   | 0.046513  | 6 4.847164   |
| 7 -2.115339  | -0.079807   | -0.065188 | 1 4.525820   |
| 6 2.773239   | 0.547002    | 0.807748  | 1 4.723972   |
| 1 2.201790   | 1.295205    | 1.358858  | 7 -2.068499  |
| 6 4.149891   | 0.473878    | 0.877011  | 6 -2.789042  |
| 1 4.692633   | 1.180829    | 1.506445  | 6 -2.705052  |
| 6 4.833025   | -0.509872   | 0.130612  | 6 -4.138944  |
| 6 4.072053   | -1.367828   | -0.654195 | 1 -2.237299  |
| 1 4.527722   | -2.148535   | -1.263927 | 6 -4.078235  |
| 6 2.669989   | -1.249273   | -0.690543 | 6 -4.816790  |
| 6 6.332036   | -0.610606   | 0.184433  | 1 -4.666011  |
| 1 6.796677   | 0.326327    | -0.163958 | 1 -4.531410  |
| 1 6.708060   | -1.434020   | -0.438352 | 14 -0.393339 |
| 1 6.675163   | -0.773457   | 1.219113  | 14 0.450421  |
| 6 0.013314   | -1.000916   | -3.312858 | 8 2.186169   |
| 1 0.482481   | -0.006019   | -3.346567 | 8 -2.017023  |
| 1 -1.059108  | -0.872414   | -3.537840 | 6 -0.624985  |
| 1 0.454788   | -1.635475   | -4.099263 | 1 -1.071915  |
| 6 -0.534711  | -3.509062   | -1.668092 | 1 -1.250510  |
| 1 -0.422750  | -3.938753   | -2.676696 | 1 0.353506   |
| 1 -1.610496  | -3.472111   | -1.430912 | 6 0.631210   |
| 1 -0.049787  | -4.184064   | -0.950147 | 1 1.050115   |
| 6 -2.756914  | 0.787693    | -0.884671 | 1 0.029212   |
| 1 -2.104622  | 1.428400    | -1.480339 | 1 1.470392   |
| 6 -4.133521  | 0.859727    | -0.958432 | 6 -0.317469  |
| 1 -4.597720  | 1.576828    | -1.637327 | 1 0.331774   |
| 6 -4.918548  | 0.007027    | -0.152872 | 1 -1.271257  |
| 6 -4.254736  | -0.876091   | 0.690136  | 1 -0.537730  |
| 1 -4.792260  | -1.562229   | 1.345261  | 6 0.447670   |
| 6 -2.847985  | -0.909154   | 0.726209  | 1 -0.566694  |
| 6 -6.419760  | 0.066745    | -0.208353 | 1 0.746134   |
| 1 -6.780125  | -0.115208   | -1.233914 | 1 1.130118   |
| 1 -6.779480  | 1.066436    | 0.085638  | 1 0.196566   |
| 1 -6.882134  | -0.674887   | 0.457566  | 14 0.765165  |
| 6 -0.136761  | -0.851436   | 3.330232  | 6 2.003059   |
| 1 -0.480526  | 0.193817    | 3.327628  | 1 1.514063   |
| 1 0.946931   | -0.846924   | 3.537036  | 1 2.746710   |
| 1 -0.639272  | -1.396329   | 4.146673  | 1 2.547422   |
| 6 0.086647   | -3.468652   | 1.776587  | 6 -0.682526  |
| 1 -0.009343  | -3.835217   | 2.811295  | 1 -1.236515  |
| 1 1.140943   | -3.572580   | 1.472747  | 1 -0.330226  |
| 1 -0.521203  | -4.111333   | 1.125319  | 1 -1.362708  |
| 6 0.148093   | 2.525875    | -0.042648 | 6 1.699901   |
| 6 0.397867   | 4.049006    | -0.013411 | 1 2.095082   |
| <b>B</b>     |             |           | 1 2.558074   |
| 77 0.008983  | -0.374019   | -0.019512 | 1 1.071284   |
| 8 -1.466971  | 2.641966    | 0.598039  | 6 -6.287692  |
| 8 -0.138863  | 1.661321    | -0.943846 | 1 -6.505298  |

1 -6.864112 -0.439351 0.475919  
1 -6.656093 -2.081276 -0.188601  
6 6.333157 -0.380487 -0.933393  
1 6.815566 0.429964 -0.362850  
1 6.790735 -1.333345 -0.633431  
1 6.563994 -0.204832 -1.996770

**TSBC**

77 0.356724 -0.397970 0.110528  
8 -1.340829 2.539133 -0.100176  
8 -0.515506 1.108031 -1.635640  
6 -1.407208 1.771782 -1.115787  
6 -2.827414 1.710891 -1.735890  
9 -2.990832 2.721194 -2.601368  
9 -3.777558 1.801658 -0.800071  
9 -3.001020 0.561569 -2.393938  
7 2.323392 0.031177 -0.390372  
6 2.632893 0.723661 -1.510888  
6 3.326428 -0.392505 0.421408  
6 3.932538 1.032914 -1.860270  
1 1.778972 1.030180 -2.115389  
6 4.669000 -0.098073 0.118721  
6 4.993233 0.620959 -1.025568  
1 4.122727 1.595825 -2.775523  
1 5.432210 -0.455554 0.810585  
7 -1.650502 -0.860497 0.498191  
6 -2.375173 -0.205383 1.441088  
6 -2.277459 -1.802739 -0.264204  
6 -3.722060 -0.416372 1.639584  
1 -1.818237 0.517808 2.029959  
6 -3.659544 -2.043335 -0.112888  
6 -4.403932 -1.350067 0.829436  
1 -4.246707 0.155514 2.406250  
1 -4.109414 -2.788519 -0.769323  
14 0.158325 -2.224993 -1.367861  
14 1.327747 -1.468485 1.864698  
8 3.023122 -1.086178 1.495771  
8 -1.595816 -2.490123 -1.142188  
6 0.281820 -1.705709 -3.181407  
1 -0.133194 -2.478469 -3.849514  
1 -0.257665 -0.761766 -3.345471  
1 1.338939 -1.548810 -3.456485  
6 0.838387 -3.984145 -1.267168  
1 0.517351 -4.495846 -0.349143  
1 0.489710 -4.573499 -2.131457  
1 1.940946 -3.974782 -1.285679  
6 1.333328 -3.329477 2.136244  
1 1.856079 -3.574651 3.075344  
1 0.301669 -3.710851 2.209981  
1 1.833278 -3.855049 1.312005  
6 1.042022 -0.664389 3.546442  
1 -0.009826 -0.788424 3.853568  
1 1.680105 -1.121679 4.320645  
1 1.257688 0.412621 3.501076  
1 0.172251 1.111827 1.032421  
14 -0.011932 2.969449 1.126423  
6 1.881327 2.941461 1.035787  
1 2.222996 2.854080 -0.006768  
1 2.276545 3.891378 1.432042  
1 2.306521 2.098872 1.598381  
6 -0.773233 2.755371 2.839757

1 -0.457170 1.837741 3.352895  
1 -0.492592 3.621526 3.461688  
1 -1.872192 2.757282 2.759144  
6 -0.341884 4.810477 0.720973  
1 -1.412743 5.062688 0.777745  
1 0.204119 5.459421 1.426894  
1 0.004988 5.066012 -0.295335  
6 -5.883642 -1.562777 0.981790  
1 -6.431840 -0.656962 0.673090  
1 -6.240159 -2.402828 0.369779  
1 -6.148601 -1.757474 2.033257  
6 6.418122 0.952812 -1.372591  
1 6.561672 2.044489 -1.426092  
1 7.122086 0.549464 -0.631543  
1 6.685167 0.544981 -2.361199

**C**

77 -0.859758 -0.412144 -0.468622  
8 2.497969 1.244128 -0.480721  
8 0.331999 1.665475 -0.780536  
6 1.469711 2.029792 -0.593430  
6 1.755888 3.546795 -0.489407  
9 0.643578 4.257543 -0.607597  
9 2.614216 3.930799 -1.445637  
9 2.314000 3.827974 0.704308  
7 -2.656911 0.649486 -0.366359  
6 -2.739277 1.982713 -0.577301  
6 -3.781727 -0.024809 -0.000165  
6 -3.913208 2.696083 -0.424043  
1 -1.805416 2.467376 -0.861501  
6 -5.003030 0.652629 0.174495  
6 -5.089323 2.024212 -0.032526  
1 -3.913447 3.772473 -0.604893  
1 -5.867698 0.059056 0.473325  
7 0.862004 -1.603886 -0.428836  
6 1.343901 -2.185318 -1.555728  
6 1.440294 -1.928991 0.765301  
6 2.377533 -3.101461 -1.556923  
1 0.836045 -1.882798 -2.470394  
6 2.504939 -2.857144 0.816796  
6 2.983428 -3.463745 -0.335324  
1 2.709643 -3.534726 -2.501756  
1 2.917357 -3.086012 1.800032  
14 -0.384727 -0.237722 1.882889  
14 -2.255246 -2.194499 -0.318329  
8 -3.716401 -1.324546 0.197635  
8 1.019832 -1.387894 1.878680  
6 0.428216 1.323738 2.620757  
1 0.898303 1.107454 3.595219  
1 1.193979 1.776263 1.976327  
1 -0.351252 2.087272 2.786435  
6 -1.432971 -0.840041 3.346870  
1 -2.067826 -1.704042 3.108312  
1 -0.799993 -1.093888 4.214246  
1 -2.101389 -0.016388 3.652274  
6 -1.952299 -3.579528 0.924545  
1 -2.892232 -4.107710 1.156329  
1 -1.266756 -4.309145 0.460666  
1 -1.496047 -3.239707 1.862711  
6 -2.811803 -3.052641 -1.903681  
1 -1.955272 -3.574819 -2.362088

1 -3.606472 -3.793805 -1.712389  
 1 -3.175868 -2.311853 -2.631092  
 1 -0.984099 -0.608341 -2.141601  
 14 4.121161 1.051718 0.124744  
 6 3.935613 0.605070 1.925293  
 1 3.176815 -0.177854 2.071009  
 1 4.898797 0.241813 2.320511  
 1 3.633058 1.482068 2.517757  
 6 5.118375 2.614759 -0.125728  
 1 6.165814 2.400871 0.146995  
 1 5.102678 2.942526 -1.176178  
 1 4.765870 3.445530 0.501206  
 6 4.779907 -0.323561 -0.945261  
 1 4.136908 -1.211464 -0.886109  
 1 4.833195 -0.005176 -1.998382  
 1 5.795483 -0.604949 -0.621571  
 6 4.121825 -4.445052 -0.299490  
 1 3.865620 -5.367178 -0.844882  
 1 5.013760 -4.019053 -0.789600  
 1 4.394978 -4.714487 0.730337  
 6 -6.382816 2.771173 0.145221  
 1 -6.274703 3.569249 0.898050  
 1 -6.687088 3.257340 -0.796423  
 1 -7.196092 2.104840 0.465328

**D**

77 0.071466 -0.286744 -0.277961  
 8 -1.680796 -3.579296 -1.441830  
 8 -0.249204 -3.005431 0.301352  
 6 -0.959571 -3.269814 -0.588391  
 7 2.149431 -0.345511 -0.251503  
 6 2.844026 -1.479002 -0.007151  
 6 2.832884 0.819649 -0.408891  
 6 4.220588 -1.504996 0.109924  
 1 2.240235 -2.381215 0.102767  
 6 4.234250 0.854254 -0.298401  
 6 4.951682 -0.307247 -0.033769  
 1 4.724958 -2.451113 0.313552  
 1 4.726624 1.818512 -0.428618  
 7 -2.017575 -0.119455 -0.206989  
 6 -2.797878 -0.439223 -1.274550  
 6 -2.623017 0.406213 0.903228  
 6 -4.166579 -0.273045 -1.290830  
 1 -2.254668 -0.839482 -2.128991  
 6 -4.023534 0.593557 0.933245  
 6 -4.814721 0.260245 -0.155028  
 1 -4.729689 -0.553411 -2.182451  
 1 -4.446604 1.012887 1.846587  
 14 -0.155186 0.357795 2.016114  
 14 0.437870 1.797587 -1.067823  
 8 2.155969 1.922838 -0.658240  
 8 -1.914521 0.748101 1.944396  
 6 -0.150879 -1.080145 3.261539  
 1 -0.615852 -0.791179 4.219390  
 1 -0.684834 -1.957141 2.863381  
 1 0.887328 -1.393022 3.467217  
 6 0.572820 1.815052 2.981097  
 1 0.687293 2.726997 2.378283  
 1 -0.041263 2.051495 3.866466  
 1 1.576946 1.527600 3.337512  
 6 -0.439813 3.279341 -0.316327

1 0.105871 4.208470 -0.550918  
 1 -1.441467 3.354345 -0.771929  
 1 -0.568641 3.205976 0.770560  
 6 0.402001 2.020158 -2.936303  
 1 -0.627892 1.883537 -3.305030  
 1 0.746994 3.025897 -3.230932  
 1 1.033234 1.262379 -3.423159  
 1 -0.000805 -0.919827 -1.863105  
 6 6.450659 -0.299780 0.088808  
 1 6.765139 -0.681792 1.073867  
 1 6.908952 -0.954303 -0.670830  
 1 6.863308 0.711092 -0.035562  
 6 -6.305432 0.454586 -0.140443  
 1 -6.618936 1.125542 -0.956985  
 1 -6.824927 -0.505032 -0.297212  
 1 -6.651249 0.882934 0.810520

**TSDE**

77 -0.027681 0.401096 -0.066784  
 8 0.825922 3.984870 -0.594089  
 8 0.060429 2.680462 1.163035  
 6 0.392904 3.161292 0.120922  
 7 -2.113380 0.369256 -0.047574  
 6 -2.850622 1.267933 0.644242  
 6 -2.749071 -0.654457 -0.679959  
 6 -4.225590 1.184876 0.748842  
 1 -2.281680 2.064905 1.124873  
 6 -4.147252 -0.788746 -0.605226  
 6 -4.908247 0.126906 0.112581  
 1 -4.766363 1.937731 1.324718  
 1 -4.601026 -1.630918 -1.128571  
 7 2.062312 0.245290 -0.037051  
 6 2.858317 1.041241 -0.798045  
 6 2.651597 -0.735269 0.711476  
 6 4.230891 0.912828 -0.846776  
 1 2.335672 1.800110 -1.378551  
 6 4.052035 -0.907196 0.694298  
 6 4.862395 -0.091131 -0.081265  
 1 4.809298 1.588289 -1.479071  
 1 4.461941 -1.705113 1.314164  
 14 0.170395 -1.199462 1.649173  
 14 -0.322603 -1.176168 -1.662317  
 8 -2.033012 -1.528814 -1.356943  
 8 1.918197 -1.532768 1.446904  
 6 0.096816 -0.431915 3.380203  
 1 0.509924 -1.110790 4.145218  
 1 0.652638 0.518227 3.415389  
 1 -0.950882 -0.212307 3.647282  
 6 -0.629204 -2.901829 1.809058  
 1 -0.721767 -3.435872 0.853624  
 1 -0.070406 -3.535564 2.517889  
 1 -1.647121 -2.766425 2.212771  
 6 0.605083 -2.810786 -1.654490  
 1 0.060388 -3.562805 -2.249149  
 1 1.584764 -2.650585 -2.135181  
 1 0.785985 -3.214016 -0.650318  
 6 -0.308128 -0.542272 -3.436007  
 1 0.712979 -0.232141 -3.712760  
 1 -0.638903 -1.319310 -4.145807  
 1 -0.961282 0.337530 -3.535154  
 1 0.015620 1.797326 -1.129893

6 -6.404134 0.007605 0.209008  
1 -6.723134 -0.068779 1.261354  
1 -6.894950 0.900776 -0.211260  
1 -6.777375 -0.874812 -0.329019  
6 6.356116 -0.257275 -0.112405  
1 6.705916 -0.447860 -1.140181  
1 6.856771 0.662795 0.231174  
1 6.687074 -1.088647 0.525232

**E**

77 -0.000026 -0.333285 0.000634  
14 -0.327236 1.207631 -1.646762  
14 0.327881 1.210933 1.644784  
8 -2.098566 1.343898 -1.538955  
8 2.099319 1.346262 1.536686  
8 0.042148 -2.437203 1.108917  
8 -0.043995 -2.438969 -1.104220  
7 -2.077734 -0.324727 0.053262  
7 2.077647 -0.325458 -0.052247  
6 -2.765497 -1.149881 0.878505  
1 -2.146474 -1.820391 1.476780  
6 -4.144381 -1.148292 0.951141  
1 -4.646574 -1.833593 1.635961  
6 -4.882508 -0.262902 0.136883  
6 -4.171859 0.577204 -0.711462  
1 -4.671309 1.286485 -1.372104  
6 -2.764580 0.537697 -0.744174  
6 -6.385093 -0.242277 0.190405  
1 -6.797739 -1.225524 -0.089294  
1 -6.806642 0.512991 -0.487291  
1 -6.736688 -0.025672 1.212356  
6 -0.007697 0.415002 -3.328645  
1 -0.381423 -0.619811 -3.350638  
1 1.078654 0.382674 -3.519490  
1 -0.481218 0.989304 -4.142268  
6 0.253621 2.995980 -1.736388  
1 0.099952 3.397279 -2.751348  
1 1.328623 3.064178 -1.502033  
1 -0.291612 3.633535 -1.027364  
6 2.764960 -1.152355 -0.876123  
1 2.145541 -1.824080 -1.472611  
6 4.143797 -1.150887 -0.949565  
1 4.645623 -1.837610 -1.633227  
6 4.882353 -0.263746 -0.137594  
6 4.172173 0.578085 0.709431  
1 4.671986 1.288780 1.368276  
6 2.764908 0.538578 0.743081  
6 6.384912 -0.243284 -0.191921  
1 6.736074 -0.031289 -1.214975  
1 6.797685 -1.225267 0.092041  
1 6.806745 0.514977 0.482248  
6 0.008383 0.422234 3.328517  
1 0.381181 -0.612868 3.352615  
1 -1.077888 0.391375 3.520048  
1 0.482907 0.997902 4.140593  
6 -0.252424 2.999758 1.730253  
1 -0.103714 3.401895 2.745609  
1 -1.326097 3.068677 1.490141  
1 0.297109 3.636201 1.023500  
6 -0.001177 -3.036834 0.002840  
1 -0.001676 -4.152205 0.003745

**F**

77 -0.110790 -0.232351 -0.103385  
8 -1.147016 2.339169 -1.931537  
8 -0.270089 0.288460 -2.273572  
6 -0.798527 1.398489 -2.642147  
7 1.946794 -0.488005 -0.280345  
6 2.548288 -0.506393 -1.493628  
6 2.706595 -0.575644 0.845546  
6 3.917389 -0.608877 -1.639705  
1 1.864559 -0.410761 -2.339746  
6 4.109455 -0.675026 0.749940  
6 4.734226 -0.692422 -0.490860  
1 4.352196 -0.615876 -2.640501  
1 4.673996 -0.736426 1.680744  
7 -2.168807 0.061649 0.042564  
6 -2.693685 1.260586 0.386696  
6 -3.010801 -0.955890 -0.271408  
6 -4.052630 1.490919 0.449086  
1 -1.972033 2.044429 0.600499  
6 -4.406539 -0.776144 -0.235023  
6 -4.948825 0.450694 0.126100  
1 -4.415193 2.480298 0.731602  
1 -5.031781 -1.629044 -0.500307  
14 -0.759356 -2.374445 -0.658773  
14 0.333341 -0.594889 2.134463  
8 2.122992 -0.557019 2.018651  
8 -2.508639 -2.125386 -0.604874  
6 -0.355940 -2.831629 -2.437056  
1 -0.957290 -3.695697 -2.764551  
1 -0.536341 -1.973356 -3.097918  
1 0.709363 -3.108309 -2.515025  
6 -0.517167 -3.927169 0.375053  
1 0.553624 -4.123604 0.545713  
1 -1.017514 -3.863999 1.349767  
1 -0.934539 -4.787133 -0.174876  
6 0.068915 -2.140946 3.185163  
1 0.466335 -1.962832 4.198267  
1 -1.004037 -2.375085 3.279571  
1 0.576939 -3.020219 2.767312  
6 -0.125110 0.828430 3.295475  
1 -1.172549 0.692838 3.615470  
1 0.504517 0.822379 4.200613  
1 -0.048416 1.816121 2.821296  
1 0.315910 1.637032 0.292231  
14 1.084046 2.939786 0.150872  
6 2.436703 2.882564 1.466737  
1 2.042965 2.674780 2.472049  
1 3.183600 2.108711 1.230950  
1 2.960807 3.852872 1.498080  
6 -0.168724 4.295687 0.497649  
1 -0.626571 4.181260 1.493557  
1 0.306574 5.289690 0.456798  
1 -0.955413 4.245670 -0.269782  
6 1.894258 3.112567 -1.532203  
1 2.649556 3.915317 -1.493795  
1 2.403829 2.183327 -1.827399  
1 1.143323 3.360534 -2.293320  
1 -0.925501 1.473327 -3.754766  
6 -6.434794 0.676580 0.164685  
1 -6.751266 1.033243 1.158303

1 -6.727416 1.451453 -0.562943  
 1 -6.992737 -0.241092 -0.067917  
 6 6.228884 -0.794631 -0.618835  
 1 6.633768 0.077134 -1.158425  
 1 6.719203 -0.850840 0.362881  
 1 6.510256 -1.689235 -1.198096  
**TSFG**  
 77 -0.118515 -0.127034 -0.176638  
 8 0.920340 2.631260 -1.785838  
 8 -0.158791 0.711246 -2.302860  
 6 0.322302 1.833425 -2.562001  
 7 1.934838 -0.513578 -0.190359  
 6 2.711601 -0.257331 -1.268141  
 6 2.511180 -1.069139 0.911698  
 6 4.068760 -0.505962 -1.294802  
 1 2.190252 0.153206 -2.129893  
 6 3.892487 -1.343781 0.939146  
 6 4.694345 -1.061092 -0.158551  
 1 4.639237 -0.272570 -2.195144  
 1 4.297946 -1.779360 1.852751  
 7 -2.197781 0.085094 -0.122403  
 6 -2.800801 1.275166 0.109670  
 6 -2.980198 -1.018260 -0.293336  
 6 -4.170998 1.423589 0.191761  
 1 -2.127748 2.118791 0.244768  
 6 -4.383449 -0.924426 -0.214093  
 6 -5.001579 0.294855 0.031570  
 1 -4.591961 2.411553 0.384581  
 1 -4.954685 -1.841804 -0.359195  
 14 -0.684613 -2.248280 -0.932274  
 14 0.064036 -0.830351 2.000956  
 8 1.769484 -1.350212 1.957201  
 8 -2.418518 -2.182564 -0.525918  
 6 -0.688936 -2.426800 -2.809635  
 1 -1.234484 -3.333521 -3.120627  
 1 -1.139606 -1.544035 -3.284851  
 1 0.348540 -2.508202 -3.175408  
 6 -0.058194 -3.885203 -0.228983  
 1 -0.904290 -4.560934 -0.022916  
 1 0.593718 -4.373988 -0.971041  
 1 0.518150 -3.761343 0.697332  
 6 -0.902644 -2.299413 2.703911  
 1 -1.097624 -2.164456 3.779650  
 1 -1.868950 -2.416003 2.188725  
 1 -0.349679 -3.240707 2.574595  
 6 0.080523 0.466789 3.371617  
 1 -0.938133 0.854440 3.538748  
 1 0.424631 0.008224 4.313894  
 1 0.732931 1.317999 3.135027  
 1 0.100940 1.661865 0.192950  
 14 0.875964 3.102515 0.202869  
 6 2.524544 2.528089 0.920241  
 1 3.240423 2.294078 0.117340  
 1 2.950058 3.341191 1.531196  
 1 2.423957 1.639994 1.558738  
 6 -0.363090 3.644044 1.575793  
 1 -0.724387 2.817734 2.201762  
 1 0.106853 4.404430 2.223276  
 1 -1.240105 4.131866 1.113080  
 6 1.206637 4.842543 -0.523417

1 0.416201 5.133116 -1.234504  
 1 1.209685 5.593703 0.284110  
 1 2.162148 4.880090 -1.068618  
 6 6.174151 -1.325797 -0.146381  
 1 6.736230 -0.378751 -0.203493  
 1 6.485811 -1.852903 0.766013  
 1 6.472993 -1.930377 -1.017670  
 6 -6.496199 0.413306 0.144338  
 1 -6.868564 1.278293 -0.426433  
 1 -7.004362 -0.490248 -0.220521  
 1 -6.791784 0.568932 1.195755  
 1 0.233694 2.180884 -3.618350  
**G**  
 77 0.669788 0.204197 -0.498059  
 8 -2.312295 -1.704592 -0.596306  
 8 -0.187633 -1.973699 -1.194466  
 6 -1.313510 -2.405362 -1.077612  
 7 2.609076 -0.567440 -0.460141  
 6 2.908196 -1.823379 -0.860295  
 6 3.602013 0.209735 0.054695  
 6 4.175041 -2.365463 -0.748719  
 1 2.070643 -2.388637 -1.269548  
 6 4.908758 -0.293923 0.197064  
 6 5.216576 -1.590171 -0.198981  
 1 4.352920 -3.388279 -1.085896  
 1 5.659825 0.372483 0.622682  
 7 -1.225667 1.084380 -0.389787  
 6 -1.804788 1.653605 -1.474777  
 6 -1.878119 1.160091 0.807355  
 6 -3.015834 2.317493 -1.432249  
 1 -1.229046 1.556401 -2.394192  
 6 -3.116756 1.834281 0.905458  
 6 -3.701572 2.426390 -0.204531  
 1 -3.420163 2.756503 -2.345884  
 1 -3.582597 1.878599 1.890569  
 14 0.186658 -0.317442 1.798472  
 14 1.764006 2.142487 -0.066307  
 8 3.325673 1.441699 0.424718  
 8 -1.375259 0.605030 1.878273  
 6 -0.392098 -2.059226 2.328312  
 1 -0.912917 -2.031985 3.300853  
 1 -1.063128 -2.528299 1.595513  
 1 0.490180 -2.713195 2.437254  
 6 1.101778 0.261159 3.359670  
 1 1.601955 1.232024 3.242514  
 1 0.420457 0.315839 4.226010  
 1 1.882008 -0.482967 3.596578  
 6 1.220778 3.312671 1.309608  
 1 2.071855 3.919860 1.660784  
 1 0.469138 4.004296 0.892377  
 1 0.768879 2.804596 2.170814  
 6 2.246444 3.256346 -1.511876  
 1 1.339669 3.701828 -1.954294  
 1 2.915730 4.074682 -1.195757  
 1 2.742246 2.667151 -2.297809  
 1 0.787091 0.614847 -2.133360  
 14 -3.930262 -2.094881 -0.119305  
 6 -4.003510 -1.780339 1.717876  
 1 -3.474062 -0.850516 1.973475  
 1 -5.049507 -1.698959 2.055790

1 -3.522537 -2.597131 2.277462  
 6 -4.241904 -3.896168 -0.543757  
 1 -5.268658 -4.169246 -0.247884  
 1 -4.146740 -4.091730 -1.624027  
 1 -3.555483 -4.568926 -0.004768  
 6 -5.002821 -0.941890 -1.119451  
 1 -4.693907 0.099762 -0.950892  
 1 -4.915834 -1.154735 -2.196646  
 1 -6.061920 -1.044439 -0.832006  
 6 -5.022819 3.139790 -0.117907  
 1 -4.947489 4.159125 -0.529238  
 1 -5.789935 2.611716 -0.709309  
 1 -5.380008 3.210439 0.919049  
 6 6.605419 -2.151070 -0.058333  
 1 6.602332 -3.051541 0.577874  
 1 7.008264 -2.452595 -1.039351  
 1 7.295568 -1.419969 0.385671  
 1 -1.559546 -3.445935 -1.381467  
**TSGH**  
 77 -0.340204 -0.092978 -0.155066  
 8 1.897286 2.237941 -1.273959  
 8 0.109153 1.134311 -2.104332  
 6 0.547406 2.020128 -1.316504  
 7 1.571406 -0.921261 -0.166792  
 6 2.387907 -0.816489 -1.240821  
 6 1.982323 -1.639278 0.913976  
 6 3.638702 -1.402552 -1.280590  
 1 1.987695 -0.222940 -2.063438  
 6 3.246903 -2.256534 0.923286  
 6 4.094926 -2.146614 -0.172867  
 1 4.256878 -1.284013 -2.172091  
 1 3.527987 -2.815390 1.816336  
 7 -2.331379 0.549044 -0.121584  
 6 -2.677053 1.819681 0.195266  
 6 -3.324676 -0.349290 -0.382903  
 6 -3.984952 2.253724 0.269010  
 1 -1.841126 2.486625 0.404968  
 6 -4.678851 0.040506 -0.317041  
 6 -5.031148 1.342530 0.008910  
 1 -4.193537 3.291961 0.532269  
 1 -5.427680 -0.721505 -0.535111  
 14 -1.322694 -2.009873 -1.048373  
 14 -0.339460 -0.832158 1.999913  
 8 1.184208 -1.752981 1.953299  
 8 -3.022515 -1.586776 -0.690522  
 6 -1.288445 -2.071429 -2.936015  
 1 -2.005192 -2.807765 -3.336934  
 1 -1.514120 -1.080088 -3.357493  
 1 -0.278389 -2.352131 -3.279261  
 6 -1.107567 -3.787638 -0.458342  
 1 -0.997270 -3.883808 0.629880  
 1 -1.953460 -4.414574 -0.786401  
 1 -0.192566 -4.192308 -0.923298  
 6 -1.645892 -1.982704 2.720586  
 1 -1.265248 -2.485687 3.625009  
 1 -2.512424 -1.368944 3.020441  
 1 -2.006615 -2.742895 2.016485  
 6 -0.030206 0.457730 3.348989  
 1 -0.920943 1.100618 3.450555  
 1 0.163920 -0.013307 4.327322

1 0.820378 1.107513 3.095777  
 1 0.251233 1.569943 0.199008  
 14 2.795931 2.940066 -0.010287  
 6 3.333455 1.605692 1.191033  
 1 3.935340 0.837379 0.682257  
 1 3.944453 2.042233 1.998446  
 1 2.465946 1.110934 1.648308  
 6 1.743920 4.234561 0.856838  
 1 2.330342 4.748893 1.636205  
 1 1.378979 4.998448 0.151219  
 1 0.873809 3.767494 1.345376  
 6 4.279394 3.705766 -0.859083  
 1 4.839882 2.939920 -1.419048  
 1 3.970820 4.487707 -1.571026  
 1 4.964485 4.159825 -0.124314  
 6 -6.468052 1.779334 0.081562  
 1 -6.704639 2.180613 1.080577  
 1 -6.667169 2.585290 -0.643785  
 1 -7.156654 0.949344 -0.128924  
 6 5.452536 -2.793686 -0.187148  
 1 5.539250 -3.501649 -1.027575  
 1 6.243736 -2.037947 -0.321765  
 1 5.653465 -3.339511 0.745209  
 1 -0.037723 2.951498 -1.158742  
**H**  
 77 -0.375701 0.176694 0.286059  
 8 2.311355 -1.909230 1.151857  
 8 0.009305 -1.573250 1.330893  
 6 1.136971 -2.025434 1.943778  
 7 1.563576 0.942016 0.315808  
 6 2.303448 0.964048 1.447055  
 6 2.097213 1.458700 -0.822307  
 6 3.578056 1.489627 1.501032  
 1 1.826927 0.538461 2.329100  
 6 3.397801 1.994833 -0.832024  
 6 4.159715 2.016402 0.329550  
 1 4.124647 1.476169 2.445097  
 1 3.774777 2.384161 -1.778028  
 7 -2.331461 -0.537998 0.244358  
 6 -2.585381 -1.865810 0.177912  
 6 -3.370282 0.340192 0.248720  
 6 -3.867941 -2.368034 0.069879  
 1 -1.697680 -2.495290 0.252251  
 6 -4.695579 -0.118551 0.138326  
 6 -4.963318 -1.479680 0.040299  
 1 -4.019128 -3.447393 0.013348  
 1 -5.490755 0.627563 0.139671  
 14 -1.453399 2.147382 0.698087  
 14 -0.273817 0.814860 -1.908271  
 8 1.379822 1.457361 -1.925608  
 8 -3.118210 1.628388 0.351908  
 6 -1.426186 2.403062 2.574554  
 1 -2.186429 3.139173 2.886513  
 1 -1.606196 1.459066 3.111395  
 1 -0.436887 2.782275 2.882580  
 6 -1.325149 3.864023 -0.070916  
 1 -0.281008 4.092341 -0.339851  
 1 -1.936680 3.947634 -0.979179  
 1 -1.665941 4.627598 0.646603  
 6 -1.252056 2.073167 -2.919257

1 -1.110715 1.883343 -3.995655  
 1 -2.328788 1.996086 -2.696956  
 1 -0.932464 3.102193 -2.707412  
 6 -0.214901 -0.741176 -2.981923  
 1 -1.234160 -1.151993 -3.079504  
 1 0.156738 -0.505054 -3.993130  
 1 0.421834 -1.523775 -2.548320  
 14 2.696206 -2.844576 -0.188787  
 6 3.372754 -1.679540 -1.497605  
 1 4.158435 -1.040853 -1.063162  
 1 3.814535 -2.240919 -2.337434  
 1 2.594607 -1.018347 -1.904506  
 6 1.189272 -3.792929 -0.801103  
 1 1.442532 -4.408931 -1.679852  
 1 0.807439 -4.465153 -0.015704  
 1 0.375550 -3.107078 -1.075148  
 6 4.042816 -4.061297 0.313962  
 1 4.925622 -3.526507 0.701011  
 1 3.685542 -4.737036 1.108496  
 1 4.367224 -4.681823 -0.538227  
 6 -6.369589 -1.998160 -0.083470  
 1 -6.493971 -2.567173 -1.019429  
 1 -6.605939 -2.686721 0.744165  
 1 -7.106851 -1.183345 -0.075458  
 6 5.557758 2.569519 0.346280  
 1 5.660816 3.353728 1.113627  
 1 6.283917 1.778304 0.596126  
 1 5.838311 2.997096 -0.626348  
 1 0.997120 -3.092789 2.230975  
 1 1.364583 -1.469796 2.881364  
**I**  
 77 0.614752 0.253859 -0.015065  
 8 -2.840899 -1.359535 -0.764605  
 8 -0.522774 -1.426836 -0.806949  
 6 -1.616106 -1.450880 -1.565879  
 7 -0.815100 1.808616 -0.026610  
 6 -2.095448 1.625468 -0.434241  
 6 -0.413686 3.075633 0.293607  
 6 -3.000290 2.661637 -0.561566  
 1 -2.398991 0.598420 -0.633152  
 6 -1.298698 4.165542 0.178051  
 6 -2.604365 3.978910 -0.256386  
 1 -4.016088 2.438793 -0.892534  
 1 -0.914031 5.149792 0.446854  
 7 2.166173 -1.136123 -0.106225  
 6 2.191904 -2.249194 0.658624  
 6 3.187764 -0.918526 -0.978437  
 6 3.242199 -3.146809 0.642518  
 1 1.323146 -2.400223 1.294667  
 6 4.291425 -1.789280 -1.026857  
 6 4.339063 -2.914918 -0.212408  
 1 3.208119 -4.024594 1.289825  
 1 5.086855 -1.555376 -1.735020  
 14 1.552399 0.909942 -1.993394  
 14 1.819270 1.871536 1.117648  
 8 0.812124 3.287151 0.713027  
 8 3.127256 0.118748 -1.788192  
 6 0.854381 0.081350 -3.533267  
 1 1.515167 0.254146 -4.399085  
 1 0.747071 -1.000168 -3.367074

1 -0.141531 0.486913 -3.773297  
 6 1.891107 2.705279 -2.431036  
 1 2.220676 3.316751 -1.582055  
 1 2.644858 2.764827 -3.233512  
 1 0.955534 3.144139 -2.816608  
 6 3.593870 2.391563 0.744029  
 1 3.794246 3.402750 1.135590  
 1 4.270681 1.692709 1.264914  
 1 3.850337 2.363801 -0.323220  
 6 1.694311 1.843706 3.008789  
 1 2.179659 0.942333 3.417698  
 1 2.174873 2.728685 3.458191  
 1 0.639684 1.826097 3.324103  
 14 -4.127867 -2.431972 -0.827560  
 6 -3.531066 -4.216874 -0.748173  
 1 -2.938781 -4.393919 0.162714  
 1 -4.388902 -4.910081 -0.741969  
 1 -2.900911 -4.473542 -1.614638  
 6 -5.103016 -2.170471 -2.419875  
 1 -5.979410 -2.837905 -2.474479  
 1 -5.462118 -1.130724 -2.493726  
 1 -4.473079 -2.370945 -3.302415  
 6 -5.198735 -2.032361 0.663904  
 1 -4.653068 -2.225279 1.600872  
 1 -5.498469 -0.972021 0.662190  
 1 -6.115037 -2.645482 0.668882  
 6 5.504451 -3.864734 -0.245415  
 1 5.992019 -3.917972 0.741925  
 1 5.170102 -4.885127 -0.494035  
 1 6.257932 -3.558853 -0.984449  
 6 -3.565905 5.126841 -0.390514  
 1 -3.914030 5.222973 -1.432109  
 1 -4.460370 4.961380 0.231983  
 1 -3.107897 6.079835 -0.091098  
 1 -1.685367 -2.391953 -2.162181  
 1 -1.691996 -0.603969 -2.287634  
 1 0.112435 -0.408381 1.813368  
 14 -1.005679 -1.018348 2.647085  
 6 -0.370221 -0.956811 4.423708  
 1 -1.087401 -1.450642 5.101054  
 1 0.595520 -1.479537 4.517482  
 1 -0.229032 0.077889 4.771601  
 6 -1.251727 -2.785666 2.068993  
 1 -2.229888 -3.172208 2.397469  
 1 -1.214094 -2.778339 0.968699  
 1 -0.473470 -3.461559 2.458938  
 6 -2.553577 0.019697 2.446136  
 1 -2.975873 -0.149144 1.446760  
 1 -3.306809 -0.269186 3.197503  
 1 -2.340854 1.093247 2.565832  
**TSIJ**  
 77 0.625407 -0.246360 0.215226  
 8 -2.264850 1.358693 -0.824778  
 8 -0.213719 1.904584 0.024341  
 6 -1.175029 2.241456 -0.907876  
 7 2.544352 0.437726 -0.249720  
 6 2.761073 1.659402 -0.780968  
 6 3.598587 -0.417867 -0.106422  
 6 4.012271 2.089113 -1.186644  
 1 1.871379 2.283324 -0.860558

6 4.890522 -0.029351 -0.498165  
 6 5.118485 1.230494 -1.046412  
 1 4.126030 3.089336 -1.607109  
 1 5.696378 -0.750766 -0.356991  
 7 -1.245143 -1.131670 0.537882  
 6 -2.001968 -0.858438 1.624322  
 6 -1.722784 -2.028966 -0.371325  
 6 -3.233837 -1.436283 1.858957  
 1 -1.575439 -0.144328 2.323221  
 6 -2.975427 -2.646967 -0.183919  
 6 -3.752718 -2.360984 0.930449  
 1 -3.789124 -1.164636 2.757935  
 1 -3.303907 -3.348826 -0.951070  
 14 0.398075 -1.316065 -1.842337  
 14 1.793988 -2.004306 1.075587  
 8 3.390789 -1.617040 0.392553  
 8 -1.015199 -2.323367 -1.436560  
 6 -0.272643 -0.269871 -3.272971  
 1 -0.516128 -0.903272 -4.142644  
 1 -1.183381 0.256653 -2.956031  
 1 0.470865 0.478949 -3.592933  
 6 1.662472 -2.472100 -2.634386  
 1 2.249069 -3.055444 -1.912930  
 1 1.171515 -3.164474 -3.338528  
 1 2.368677 -1.854072 -3.214928  
 6 1.469323 -3.821679 0.703710  
 1 2.375091 -4.423699 0.885231  
 1 0.689037 -4.176049 1.398364  
 1 1.116110 -4.009365 -0.318409  
 6 2.079435 -1.886045 2.938653  
 1 1.125913 -2.034722 3.472232  
 1 2.796163 -2.645761 3.293216  
 1 2.455807 -0.887396 3.207673  
 14 -3.860188 1.546001 -1.327057  
 6 -4.223606 0.149733 -2.527461  
 1 -3.972200 -0.818258 -2.066043  
 1 -5.288199 0.129608 -2.813318  
 1 -3.623253 0.248548 -3.445846  
 6 -4.070425 3.225247 -2.151729  
 1 -5.104355 3.350404 -2.513769  
 1 -3.861910 4.047397 -1.447928  
 1 -3.396760 3.336735 -3.017079  
 6 -4.966474 1.412674 0.183437  
 1 -4.782456 0.462196 0.706932  
 1 -4.766886 2.232944 0.891514  
 1 -6.031805 1.453851 -0.097739  
 6 -5.088595 -3.013848 1.152072  
 1 -5.021987 -3.766272 1.956141  
 1 -5.841619 -2.274219 1.466419  
 1 -5.449946 -3.519045 0.245442  
 6 6.498995 1.645270 -1.478609  
 1 6.524935 2.696664 -1.797597  
 1 7.224954 1.513550 -0.660673  
 1 6.846503 1.024945 -2.321305  
 1 -0.713897 2.157245 -1.910132  
 1 -1.512762 3.282771 -0.764591  
 1 0.561954 0.694503 1.747178  
 14 -0.077732 2.293219 1.858793  
 6 -1.607458 3.454685 1.813539  
 1 -2.534999 2.878518 1.658285

1 -1.699175 3.973272 2.780442  
 1 -1.559509 4.223226 1.026141  
 6 -0.272232 1.725720 3.706999  
 1 0.670153 1.274991 4.059078  
 1 -0.529858 2.583160 4.352987  
 1 -1.064884 0.973503 3.858799  
 6 1.496394 3.338239 1.871769  
 1 1.403560 4.116001 2.648200  
 1 2.388373 2.733168 2.096146  
 1 1.660820 3.847787 0.910637  
**J**  
 77 0.486339 -0.533627 -0.437974  
 8 -2.029784 1.588739 0.657216  
 8 -0.354619 2.056723 -0.802604  
 6 -1.300989 2.611054 0.087230  
 7 -1.475144 -1.115844 -0.836282  
 6 -2.348869 -0.341573 -1.513775  
 6 -1.862306 -2.368604 -0.471014  
 6 -3.641487 -0.742290 -1.798374  
 1 -1.959973 0.626891 -1.821200  
 6 -3.178195 -2.813390 -0.694480  
 6 -4.091929 -2.004300 -1.361784  
 1 -4.298481 -0.076629 -2.360628  
 1 -3.435797 -3.817052 -0.354742  
 7 2.519999 -0.156020 -0.081830  
 6 3.400556 0.016745 -1.101340  
 6 3.010346 -0.200181 1.195836  
 6 4.756910 0.185132 -0.916106  
 1 2.954858 0.010330 -2.093459  
 6 4.394711 -0.032852 1.436255  
 6 5.285771 0.163884 0.393366  
 1 5.403866 0.322820 -1.784084  
 1 4.722230 -0.067231 2.475831  
 14 0.409209 -0.197552 1.949044  
 14 0.741350 -2.769133 -0.198382  
 8 -0.970270 -3.171614 0.072871  
 8 2.206175 -0.399550 2.198163  
 6 0.314529 1.518236 2.781203  
 1 0.779121 1.465513 3.780225  
 1 0.861038 2.274909 2.196943  
 1 -0.723458 1.858205 2.898105  
 6 -0.311928 -1.354440 3.277215  
 1 -0.581321 -2.344622 2.882016  
 1 0.402613 -1.484767 4.107536  
 1 -1.223803 -0.900987 3.700976  
 6 1.700761 -3.536546 1.224262  
 1 1.450822 -4.607268 1.308415  
 1 2.777544 -3.459791 0.998129  
 1 1.526394 -3.049633 2.190778  
 6 1.185985 -3.754480 -1.743033  
 1 2.220517 -3.519024 -2.043221  
 1 1.110758 -4.841945 -1.573561  
 1 0.528224 -3.470877 -2.578222  
 14 -3.552171 1.664811 1.384192  
 6 -4.810204 2.289005 0.131493  
 1 -4.859268 1.621620 -0.741603  
 1 -5.814588 2.332537 0.584614  
 1 -4.565229 3.303670 -0.223045  
 6 -3.491526 2.851412 2.843054  
 1 -4.485291 2.939593 3.312772



1 -2.783385 2.506069 3.612532  
 1 -3.182461 3.861986 2.528333  
 6 -3.902659 -0.084053 1.932927  
 1 -3.940363 -0.767042 1.072595  
 1 -3.109614 -0.440225 2.607456  
 1 -4.863920 -0.144656 2.468625  
 6 6.759376 0.344745 0.631882  
 1 7.337653 -0.438679 0.114866  
 1 7.103786 1.313077 0.232977  
 1 7.006194 0.305366 1.701988  
 6 -5.507448 -2.447806 -1.609447  
 1 -6.210192 -1.856916 -0.997600  
 1 -5.792455 -2.297220 -2.662847  
 1 -5.650999 -3.508272 -1.358908  
 1 -1.962717 3.300214 -0.477699  
 1 -0.781507 3.194291 0.872980  
 1 0.797662 -0.678705 -2.095408  
 14 0.798495 3.071052 -1.563844  
 6 2.222849 3.358242 -0.376196  
 1 2.698355 2.415402 -0.075586  
 1 2.990585 3.997352 -0.842943  
 1 1.872174 3.867712 0.535702  
 6 -0.032959 4.720863 -1.936572  
 1 -0.314501 5.269388 -1.023323  
 1 0.661507 5.361996 -2.504996  
 1 -0.937633 4.586283 -2.551878  
 6 1.284730 2.214967 -3.150933  
 1 0.574828 2.467205 -3.955034  
 1 2.294151 2.513074 -3.476587  
 1 1.255461 1.122839 -3.006364

**J<sub>OMe</sub>**

77 0.850207 -0.797961 -0.282094  
 8 -3.434681 2.012054 -0.457256  
 8 -1.219201 2.352877 -0.879634  
 6 -2.443203 2.978094 -0.623581  
 7 -1.028583 -1.497227 -0.843821  
 6 -1.964477 -0.693686 -1.390980  
 6 -1.277647 -2.833012 -0.772391  
 6 -3.162691 -1.167626 -1.893381  
 1 -1.728894 0.365508 -1.388045  
 6 -2.476573 -3.373745 -1.274005  
 6 -3.439739 -2.548192 -1.844945  
 1 -3.876817 -0.455741 -2.310175  
 1 -2.616274 -4.452019 -1.190198  
 7 2.811683 -0.179222 0.104362  
 6 3.816736 -0.489692 -0.755804  
 6 3.118786 0.548844 1.219486  
 6 5.124182 -0.087569 -0.579813  
 1 3.513043 -1.094647 -1.607880  
 6 4.449678 0.978951 1.449437  
 6 5.466151 0.675176 0.560035  
 1 5.878088 -0.373387 -1.315231  
 1 4.629743 1.559226 2.355045  
 14 0.422299 0.489542 1.765052  
 14 1.076772 -2.910060 0.511221  
 8 -0.381085 -3.616581 -0.216937  
 8 2.193843 0.868347 2.067446  
 6 -0.201290 2.280883 1.982937  
 1 0.240091 2.690139 2.907316  
 1 0.050400 2.948640 1.150955

1 -1.293302 2.290223 2.095453  
 6 0.023399 -0.224697 3.488408  
 1 0.649540 -1.092782 3.732538  
 1 0.202141 0.548871 4.254034  
 1 -1.030845 -0.531721 3.562766  
 6 0.863937 -3.387737 2.323802  
 1 0.823257 -4.487161 2.404780  
 1 1.714902 -3.032358 2.926904  
 1 -0.055906 -2.971772 2.756727  
 6 2.520760 -3.941945 -0.124805  
 1 3.470182 -3.496773 0.218339  
 1 2.477725 -4.977839 0.250278  
 1 2.531612 -3.955045 -1.224236  
 14 -3.865574 1.249539 0.960548  
 6 -5.525537 0.471102 0.659536  
 1 -5.456162 -0.295525 -0.127661  
 1 -5.907201 -0.011121 1.573534  
 1 -6.253335 1.231973 0.339514  
 6 6.882560 1.126042 0.787478  
 1 7.560715 0.259736 0.859331  
 1 7.237680 1.741249 -0.055634  
 1 6.978871 1.715658 1.709821  
 6 -4.734808 -3.095549 -2.380015  
 1 -5.596949 -2.626348 -1.877508  
 1 -4.836458 -2.879719 -3.456320  
 1 -4.806374 -4.183335 -2.240145  
 1 -2.741177 3.614906 -1.476223  
 1 -2.350046 3.597313 0.284839  
 1 1.397271 -1.643542 -1.621282  
 14 0.058340 2.668372 -1.876137  
 6 -0.528614 3.447597 -3.458934  
 1 -0.993231 4.424009 -3.247631  
 1 0.303589 3.628497 -4.155672  
 1 -1.276188 2.811292 -3.957786  
 8 0.715433 1.140542 -2.090460  
 8 1.190553 3.668742 -1.216766  
 8 -2.762617 0.120952 1.469548  
 8 -3.878327 2.457090 2.096588  
 6 -2.953684 -1.255972 1.708898  
 1 -1.968481 -1.739811 1.735567  
 1 -3.451107 -1.426775 2.680218  
 1 -3.550882 -1.736284 0.917658  
 6 -3.742238 2.282573 3.490310  
 1 -3.502613 3.255617 3.945697  
 1 -4.680675 1.912636 3.943255  
 1 -2.931641 1.575214 3.735050  
 6 2.347366 3.343881 -0.467628  
 1 2.094381 3.090255 0.572002  
 1 2.890783 2.490365 -0.903962  
 1 3.015585 4.218431 -0.465036  
 6 1.614037 0.859446 -3.156819  
 1 1.637215 -0.229120 -3.292220  
 1 1.287212 1.338570 -4.095402  
 1 2.633277 1.207960 -2.919135

**M**

77 0.006895 -0.075266 -0.557190  
 8 0.024142 -2.132981 -1.571937  
 6 -0.038042 -1.259091 -2.494942  
 7 2.094792 -0.091387 -0.432264  
 6 2.836952 -1.112824 -0.919457

|             |           |           |           |    |           |           |           |
|-------------|-----------|-----------|-----------|----|-----------|-----------|-----------|
| 6           | 2.715714  | 0.908405  | 0.250016  | 1  | -5.904137 | 0.998224  | -0.643132 |
| 6           | 4.209964  | -1.170464 | -0.779013 | 7  | 0.687154  | -1.632298 | -0.462143 |
| 1           | 2.263142  | -1.908490 | -1.398473 | 6  | 1.126720  | -1.975921 | -1.697020 |
| 6           | 4.112977  | 0.898688  | 0.420914  | 6  | 1.392698  | -2.073938 | 0.621397  |
| 6           | 4.882784  | -0.137983 | -0.093010 | 6  | 2.261814  | -2.732150 | -1.918927 |
| 1           | 4.755494  | -2.021185 | -1.190985 | 1  | 0.515092  | -1.604290 | -2.516844 |
| 1           | 4.556999  | 1.727956  | 0.972421  | 6  | 2.564182  | -2.846040 | 0.448831  |
| 7           | -2.088594 | -0.056743 | -0.417486 | 6  | 3.018689  | -3.184281 | -0.818026 |
| 6           | -2.871834 | 0.423159  | -1.415166 | 1  | 2.557651  | -2.967278 | -2.942595 |
| 6           | -2.690678 | -0.478325 | 0.733646  | 1  | 3.081960  | -3.174284 | 1.350871  |
| 6           | -4.246687 | 0.497387  | -1.333842 | 14 | -0.696064 | -1.109187 | 2.094572  |
| 1           | -2.333399 | 0.765659  | -2.298088 | 14 | -2.617575 | -1.856258 | -0.874692 |
| 6           | -4.095758 | -0.422001 | 0.867631  | 8  | -3.994673 | -0.721117 | -0.866905 |
| 6           | -4.894158 | 0.062368  | -0.156945 | 8  | 0.997908  | -1.771340 | 1.829278  |
| 1           | -4.814249 | 0.896773  | -2.175902 | 6  | -0.400320 | 0.078554  | 3.561422  |
| 1           | -4.517471 | -0.775436 | 1.808943  | 1  | 0.337685  | -0.338700 | 4.268292  |
| 14          | -0.226231 | -1.259279 | 1.528157  | 1  | -0.077670 | 1.089680  | 3.273883  |
| 14          | 0.263280  | 2.010615  | 0.411889  | 1  | -1.353245 | 0.187968  | 4.107906  |
| 8           | 1.998161  | 1.883137  | 0.764592  | 6  | -1.438680 | -2.618741 | 2.982600  |
| 8           | -1.975442 | -0.928105 | 1.731523  | 1  | -1.436354 | -3.511869 | 2.341151  |
| 6           | -0.169062 | -3.145703 | 1.476333  | 1  | -0.863139 | -2.846003 | 3.896192  |
| 1           | -0.565442 | -3.592770 | 2.403487  | 1  | -2.482950 | -2.424317 | 3.279496  |
| 1           | -0.738495 | -3.522052 | 0.614230  | 6  | -3.297180 | -3.283471 | 0.159181  |
| 1           | 0.874792  | -3.479518 | 1.350796  | 1  | -4.194523 | -3.701079 | -0.327803 |
| 6           | 0.561646  | -0.782935 | 3.179092  | 1  | -2.552813 | -4.091739 | 0.247969  |
| 1           | 0.711689  | 0.296857  | 3.310943  | 1  | -3.569365 | -2.960387 | 1.173351  |
| 1           | -0.036846 | -1.163210 | 4.024036  | 6  | -2.556487 | -2.513652 | -2.645501 |
| 1           | 1.552642  | -1.265629 | 3.231842  | 1  | -1.719894 | -3.226765 | -2.746527 |
| 6           | -0.616064 | 2.459836  | 2.018293  | 1  | -3.484062 | -3.044628 | -2.917410 |
| 1           | -0.040852 | 3.218753  | 2.574544  | 1  | -2.388370 | -1.691857 | -3.356913 |
| 1           | -1.589494 | 2.908525  | 1.756503  | 14 | 4.278560  | 1.216374  | 0.732360  |
| 1           | -0.809109 | 1.605000  | 2.677755  | 6  | 4.740129  | 0.097308  | -0.691105 |
| 6           | 0.162658  | 3.564679  | -0.649033 | 1  | 4.886909  | 0.653778  | -1.627981 |
| 1           | -0.867614 | 3.694496  | -1.020827 | 1  | 5.676893  | -0.436293 | -0.460017 |
| 1           | 0.436213  | 4.465862  | -0.074721 | 1  | 3.953144  | -0.654342 | -0.851337 |
| 1           | 0.825713  | 3.482216  | -1.523319 | 6  | 4.080445  | 0.257937  | 2.327682  |
| 6           | -6.391038 | 0.126944  | -0.032929 | 1  | 5.071680  | -0.117689 | 2.632521  |
| 1           | -6.750504 | 1.159293  | -0.174399 | 1  | 3.704941  | 0.898938  | 3.141200  |
| 1           | -6.872534 | -0.489913 | -0.809468 | 1  | 3.404414  | -0.604515 | 2.233260  |
| 1           | -6.733712 | -0.226857 | 0.949255  | 6  | 5.461955  | 2.641853  | 0.983152  |
| 6           | 6.376880  | -0.170531 | 0.074839  | 1  | 5.661763  | 3.194129  | 0.054948  |
| 1           | 6.693539  | -1.095456 | 0.583859  | 1  | 5.062282  | 3.349153  | 1.727402  |
| 1           | 6.879884  | -0.155678 | -0.906119 | 1  | 6.421397  | 2.256035  | 1.366492  |
| 1           | 6.739499  | 0.686336  | 0.659510  | 6  | 4.278882  | -3.978741 | -1.020565 |
| 1           | -0.998212 | -1.056321 | -3.007007 | 1  | 4.661328  | -4.384101 | -0.073247 |
| 1           | -0.034567 | 1.005467  | -1.843099 | 1  | 4.112241  | -4.816060 | -1.716444 |
| 1           | 0.867531  | -0.993035 | -3.076478 | 1  | 5.065954  | -3.344399 | -1.462912 |
| <b>TSJM</b> |           |           |           | 6  | -5.935843 | 3.608142  | 0.310934  |
| 77          | -0.991531 | -0.404795 | -0.198709 | 1  | -6.096088 | 3.916174  | 1.357430  |
| 8           | 2.691090  | 1.879590  | 0.367032  | 1  | -5.739848 | 4.526232  | -0.267225 |
| 8           | 0.532445  | 1.417075  | 0.111235  | 1  | -6.868157 | 3.160684  | -0.061272 |
| 6           | 1.407794  | 1.427326  | 1.096944  | 1  | 1.641057  | 0.462083  | 1.565633  |
| 7           | -2.603386 | 0.883103  | 0.022291  | 1  | 1.274741  | 2.211116  | 1.873763  |
| 6           | -2.444174 | 2.132322  | 0.513483  | 1  | -1.000655 | -0.027749 | -1.836152 |
| 6           | -3.838217 | 0.489462  | -0.388436 | 14 | 1.897983  | 2.562189  | -1.189417 |
| 6           | -3.485877 | 3.033523  | 0.621449  | 6  | 0.687606  | 3.970707  | -0.897054 |
| 1           | -1.421261 | 2.377603  | 0.798553  | 1  | -0.341855 | 3.640097  | -1.092023 |
| 6           | -4.937102 | 1.367798  | -0.300239 | 1  | 0.737907  | 4.298286  | 0.154767  |
| 6           | -4.779077 | 2.652024  | 0.205440  | 1  | 0.924908  | 4.841281  | -1.529241 |
| 1           | -3.294910 | 4.029636  | 1.024785  | 6  | 1.593896  | 1.330093  | -2.556884 |

1 2.308394 0.496248 -2.475336  
1 0.576727 0.915904 -2.501284  
1 1.758144 1.816185 -3.532553  
6 3.478896 3.480896 -1.746121  
1 3.805032 4.242597 -1.019730  
1 4.336508 2.827017 -1.969824  
1 3.232735 4.009524 -2.682952

**TSIM**

77 0.656791 0.237972 -0.051763  
8 -2.460146 -1.626300 -0.259845  
8 0.083456 -1.363444 -1.800196  
6 -1.029746 -1.518014 -2.257422  
7 -0.869925 1.678449 0.032738  
6 -2.072831 1.515080 -0.562935  
6 -0.606900 2.863139 0.655163  
6 -3.017095 2.520745 -0.633140  
1 -2.266192 0.511864 -0.936296  
6 -1.528166 3.924871 0.605886  
6 -2.745063 3.774428 -0.048394  
1 -3.968614 2.328506 -1.130559  
1 -1.254631 4.851422 1.111408  
7 2.326382 -1.017497 -0.130747  
6 2.315807 -2.253307 0.421301  
6 3.465509 -0.588422 -0.743225  
6 3.414615 -3.088850 0.419950  
1 1.376582 -2.544343 0.883556  
6 4.618659 -1.396126 -0.766864  
6 4.613774 -2.656766 -0.183700  
1 3.340100 -4.071122 0.889160  
1 5.501029 -0.994531 -1.265840  
14 1.967789 1.484229 -1.518002  
14 1.429373 1.513168 1.674106  
8 0.524467 3.000151 1.312327  
8 3.491326 0.594309 -1.319705  
6 1.504545 1.187182 -3.326772  
1 2.246632 1.638200 -4.006301  
1 1.432866 0.111249 -3.541316  
1 0.523206 1.642142 -3.543631  
6 2.409103 3.310363 -1.395773  
1 2.683898 3.641196 -0.386575  
1 3.230662 3.551623 -2.090652  
1 1.526421 3.894381 -1.707112  
6 3.248633 1.979429 1.812430  
1 3.358621 2.900433 2.408610  
1 3.763904 1.169221 2.355244  
1 3.759474 2.114310 0.851058  
6 0.875481 1.146673 3.438060  
1 1.435534 0.300417 3.864740  
1 1.062906 2.036257 4.062920  
1 -0.194750 0.904536 3.489570  
14 -3.999275 -1.943764 -0.823277  
6 -4.092320 -3.656069 -1.620397  
1 -3.718027 -4.444981 -0.951823  
1 -5.133011 -3.904154 -1.888553  
1 -3.495950 -3.692260 -2.547497  
6 -4.464432 -0.710718 -2.188070  
1 -5.446623 -0.998886 -2.599488  
1 -4.561157 0.315184 -1.800994  
1 -3.758479 -0.692798 -3.033134  
6 -5.339152 -1.747606 0.492898

1 -5.152684 -2.349819 1.393073  
1 -5.419816 -0.694882 0.807000  
1 -6.314030 -2.053026 0.076819  
6 5.832149 -3.537498 -0.194051  
1 6.157762 -3.762451 0.834873  
1 5.611838 -4.502548 -0.678703  
1 6.670898 -3.066947 -0.725537  
6 -3.748759 4.891436 -0.118654  
1 -3.928645 5.186680 -1.165621  
1 -4.718668 4.571913 0.295644  
1 -3.411072 5.778399 0.435098  
1 -1.387968 -2.518370 -2.576802  
1 -1.696255 -0.665672 -2.481156  
1 -0.467840 -1.012352 0.709443  
14 -1.737816 -1.839279 1.446469  
6 -2.713688 -0.483425 2.350867  
1 -2.034559 0.160112 2.929805  
1 -3.286455 0.158281 1.666860  
1 -3.423425 -0.937950 3.061828  
6 -0.365392 -2.282315 2.774317  
1 0.283578 -1.428787 3.011458  
1 -0.848091 -2.646082 3.698749  
1 0.278104 -3.113935 2.435991  
6 -2.505804 -3.606999 1.595798  
1 -3.499494 -3.758216 1.155446  
1 -1.826451 -4.329663 1.108802  
1 -2.566621 -3.895151 2.657847

**TSJK**

77 -1.158096 0.244514 -0.181668  
7 -1.499400 -1.813708 -0.255651  
6 -0.498767 -2.693533 -0.492156  
6 -2.748054 -2.296700 0.007406  
6 -0.669489 -4.062676 -0.447697  
1 0.472383 -2.259391 -0.717632  
6 -2.974080 -3.684567 0.083370  
6 -1.939322 -4.588801 -0.136237  
1 0.185591 -4.710502 -0.643633  
1 -3.989511 -4.014237 0.306587  
7 -0.723632 2.285657 -0.103187  
6 -1.016411 3.063823 0.961576  
6 -0.061961 2.848596 -1.154339  
6 -0.656120 4.396267 1.046221  
1 -1.570317 2.575863 1.762274  
6 0.335445 4.194652 -1.120913  
6 0.050188 4.991553 -0.015697  
1 -0.918231 4.967331 1.937689  
1 0.870812 4.582271 -1.988316  
14 -0.642810 0.553324 -2.410095  
14 -3.537449 0.280703 -0.231169  
8 -3.734934 -1.455173 0.192231  
8 0.193888 2.109086 -2.210908  
6 0.612606 -0.578322 -3.234659  
1 0.926382 -0.146686 -4.199266  
1 1.515207 -0.755035 -2.634336  
1 0.150542 -1.557778 -3.441216  
6 -1.935310 0.958767 -3.717904  
1 -2.641102 1.725464 -3.368214  
1 -1.431951 1.333584 -4.624793  
1 -2.514260 0.064022 -3.995555  
6 -4.677008 0.421057 -1.732981

1 -5.699855 0.119139 -1.451797  
 1 -4.718065 1.458270 -2.103313  
 1 -4.343566 -0.219436 -2.562003  
 6 -4.447086 1.166923 1.171916  
 1 -4.447935 2.253624 0.979631  
 1 -5.497290 0.838104 1.242407  
 1 -3.964821 0.997513 2.145234  
 6 0.515705 6.419384 0.045786  
 1 0.294435 6.952520 -0.891410  
 1 0.048219 6.963206 0.878367  
 1 1.608819 6.455093 0.190682  
 6 -2.164240 -6.071163 -0.020475  
 1 -1.413868 -6.638261 -0.589176  
 1 -2.088467 -6.386439 1.034443  
 1 -3.166327 -6.355020 -0.374460  
 1 -1.521658 0.236339 1.683519  
 14 -0.900853 -0.272100 2.991595  
 1 0.543741 -0.047452 0.015622  
 6 2.067687 -0.308911 0.192447  
 1 2.153746 -0.347355 -0.886092  
 1 1.827930 -1.201850 0.759341  
 8 3.976864 -1.179759 -0.091176  
 8 2.470001 0.756372 0.866395  
 14 3.782032 1.782775 0.403209  
 14 4.057314 -2.790646 -0.284249  
 6 5.350262 1.225808 1.245681  
 1 6.193672 1.887529 0.985681  
 1 5.231307 1.233807 2.341169  
 1 5.550032 0.197119 0.912993  
 6 3.229567 3.444399 1.088213  
 1 4.000912 4.212822 0.912772  
 1 2.293194 3.779710 0.621324  
 1 3.064594 3.375860 2.175793  
 6 3.876905 1.771946 -1.465300  
 1 4.603987 2.515234 -1.831016  
 1 4.205049 0.768191 -1.776474  
 1 2.897974 1.990283 -1.922773  
 6 5.849322 -3.404186 -0.297787  
 1 6.421746 -2.911534 -1.101319  
 1 6.346360 -3.165239 0.657362  
 1 5.914091 -4.495025 -0.452396  
 6 3.248216 -3.376964 -1.911649  
 1 3.321174 -4.470902 -2.041097  
 1 2.177607 -3.111914 -1.956933  
 1 3.732447 -2.902461 -2.781843  
 6 3.146872 -3.739300 1.102051  
 1 2.054496 -3.582324 1.066072  
 1 3.317951 -4.827578 1.032701  
 1 3.494008 -3.406344 2.094854  
 6 -2.362663 -0.200323 4.179449  
 1 -2.740557 0.827513 4.297937  
 1 -3.192067 -0.829907 3.819983  
 1 -2.062876 -0.565862 5.175928  
 6 -0.309356 -2.043724 2.820880  
 1 0.516516 -2.141126 2.104286  
 1 0.051090 -2.405048 3.797886  
 1 -1.124418 -2.706689 2.492736  
 6 0.460982 0.917603 3.476563  
 1 1.256266 0.928853 2.715414  
 1 0.074140 1.943089 3.587224

1 0.900194 0.617180 4.442425  
**TSJK<sub>OMe</sub>**  
 77 -1.247176 0.450178 -0.460972  
 7 -2.177941 -1.416325 -0.293236  
 6 -1.466391 -2.547498 -0.056313  
 6 -3.533694 -1.508762 -0.414799  
 6 -2.058077 -3.783711 0.106406  
 1 -0.384061 -2.443804 0.007669  
 6 -4.186595 -2.747149 -0.233178  
 6 -3.461824 -3.900925 0.031619  
 1 -1.425359 -4.650152 0.301551  
 1 -5.273134 -2.755369 -0.324323  
 7 -0.218366 2.263105 -0.661683  
 6 -0.480949 3.357618 0.090648  
 6 0.803198 2.324262 -1.558266  
 6 0.252565 4.522331 0.006662  
 1 -1.327674 3.268862 0.769984  
 6 1.597227 3.479070 -1.673670  
 6 1.331809 4.597905 -0.898381  
 1 -0.009525 5.368415 0.643799  
 1 2.418890 3.451552 -2.388237  
 14 -0.235734 0.046576 -2.494672  
 14 -3.445295 1.114189 -1.114855  
 8 -4.235822 -0.445065 -0.704569  
 8 1.021378 1.290451 -2.341939  
 6 0.687040 -1.565773 -2.771831  
 1 1.358006 -1.464539 -3.641013  
 1 1.280562 -1.911225 -1.915131  
 1 -0.042498 -2.358731 -3.007001  
 6 -1.048062 0.487405 -4.136779  
 1 -1.495073 1.491455 -4.111321  
 1 -0.295132 0.458382 -4.942231  
 1 -1.842967 -0.232820 -4.387932  
 6 -4.136082 1.443321 -2.844000  
 1 -5.236233 1.511067 -2.804763  
 1 -3.750845 2.398079 -3.238987  
 1 -3.862423 0.650877 -3.554721  
 6 -4.338260 2.329770 0.033234  
 1 -3.955640 3.352021 -0.132699  
 1 -5.424516 2.344293 -0.157787  
 1 -4.171390 2.071039 1.090577  
 6 2.136258 5.860643 -1.037092  
 1 3.079628 5.682383 -1.572169  
 1 1.567835 6.620569 -1.600052  
 1 2.369054 6.295277 -0.053276  
 6 -4.134427 -5.231573 0.225148  
 1 -5.226040 -5.155633 0.124724  
 1 -3.768416 -5.963977 -0.512783  
 1 -3.906304 -5.641713 1.222648  
 1 -1.979703 0.955393 1.199365  
 14 -1.483815 0.715828 2.616657  
 1 0.186150 -0.199871 0.212961  
 6 1.635736 -0.704400 0.771602  
 1 1.859858 -0.827537 -0.278520  
 1 1.074515 -1.445577 1.331257  
 8 3.348661 -1.818910 1.011552  
 8 2.040521 0.365951 1.431186  
 14 3.417890 1.271677 1.053581  
 14 3.291652 -3.265568 0.325682  
 6 4.870227 0.714264 2.055813

1 5.798234 1.226525 1.756969  
 1 4.692196 0.895778 3.127384  
 1 4.963196 -0.370474 1.895185  
 6 3.905602 -4.676831 1.400779  
 1 3.293739 -4.751025 2.314057  
 1 3.863426 -5.644797 0.874714  
 1 4.947913 -4.508422 1.716847  
 6 -0.169345 1.902930 3.161683  
 1 0.665613 1.951596 2.450941  
 1 -0.599313 2.910305 3.278115  
 1 0.234955 1.579961 4.134121  
 8 1.695770 -3.594584 -0.156522  
 8 4.098467 -3.358972 -1.158711  
 8 2.872951 2.781659 1.477888  
 8 3.664730 1.293738 -0.574119  
 8 -2.956267 1.015065 3.351169  
 8 -1.012182 -0.842349 2.935510  
 6 3.677316 3.929673 1.551526  
 1 3.061852 4.768838 1.912214  
 1 4.523148 3.802310 2.253365  
 1 4.088875 4.206054 0.564200  
 6 4.159030 0.288519 -1.446012  
 1 3.528495 0.277553 -2.347805  
 1 5.196509 0.521880 -1.741665  
 1 4.130239 -0.705565 -0.977324  
 6 1.374049 -4.694330 -0.973131  
 1 0.386686 -4.526415 -1.434099  
 1 2.111345 -4.832055 -1.782777  
 1 1.320694 -5.634542 -0.389645  
 6 5.490033 -3.324728 -1.303562  
 1 5.997178 -4.125129 -0.729081  
 1 5.750391 -3.464159 -2.366832  
 1 5.921204 -2.357947 -0.976832  
 6 -3.160589 1.156629 4.738423  
 1 -2.531590 1.957173 5.170462  
 1 -4.215188 1.418385 4.916254  
 1 -2.942569 0.221017 5.285722  
 6 -1.880104 -1.939450 3.141740  
 1 -2.234672 -1.968935 4.187152  
 1 -2.762021 -1.910325 2.480721  
 1 -1.326937 -2.866449 2.934672  
**K**  
 77 -0.042317 -0.350026 0.045554  
 7 -2.064332 -0.153068 0.496595  
 6 -2.477840 0.735182 1.430452  
 6 -2.979787 -0.894708 -0.183832  
 6 -3.813595 0.922853 1.725924  
 1 -1.661799 1.304882 1.883240  
 6 -4.355715 -0.728082 0.070842  
 6 -4.791003 0.179592 1.029584  
 1 -4.098605 1.653160 2.485122  
 1 -5.052954 -1.338837 -0.503448  
 7 1.982864 -0.502910 -0.399816  
 6 2.520007 0.069034 -1.502227  
 6 2.805270 -1.154123 0.463897  
 6 3.867378 0.014673 -1.796518  
 1 1.814127 0.583577 -2.152973  
 6 4.186051 -1.255684 0.207394  
 6 4.740028 -0.668847 -0.922511  
 1 4.240117 0.500840 -2.699339

1 4.794366 -1.791408 0.936380  
 14 0.559205 -1.579304 1.882327  
 14 -0.813867 -2.111450 -1.253119  
 8 -2.569557 -1.754539 -1.085035  
 8 2.297319 -1.690454 1.549317  
 6 0.386186 -0.629950 3.496958  
 1 1.019313 -1.069537 4.285099  
 1 0.643790 0.426485 3.353127  
 1 -0.663203 -0.680104 3.833444  
 6 0.094465 -3.361514 2.260888  
 1 0.453637 -4.059886 1.494353  
 1 0.540566 -3.645712 3.228656  
 1 -0.998395 -3.472188 2.347724  
 6 -0.803285 -3.976653 -0.940765  
 1 -1.344072 -4.486130 -1.755657  
 1 0.226783 -4.369201 -0.922406  
 1 -1.287350 -4.241763 0.008788  
 6 -0.473182 -1.975748 -3.113436  
 1 0.510524 -2.430692 -3.322579  
 1 -1.227595 -2.526211 -3.699674  
 1 -0.442257 -0.937569 -3.470929  
 6 6.214452 -0.738285 -1.207539  
 1 6.743432 -1.352678 -0.465950  
 1 6.401986 -1.161739 -2.207505  
 1 6.658152 0.270978 -1.196602  
 6 -6.253326 0.372238 1.323341  
 1 -6.470810 0.149184 2.380724  
 1 -6.551189 1.419175 1.149306  
 1 -6.884115 -0.274484 0.697744  
 1 -0.432363 0.719879 -1.633989  
 14 -1.211509 1.846319 -2.291250  
 8 0.279958 1.536776 1.028056  
 14 1.476210 2.606472 1.337185  
 6 0.867764 3.811231 2.665493  
 1 -0.059193 4.311433 2.338439  
 1 0.642382 3.274141 3.602276  
 1 1.612913 4.591895 2.894035  
 6 1.942419 3.620177 -0.200306  
 1 2.724186 4.363856 0.030117  
 1 2.333351 2.962761 -0.994190  
 1 1.071167 4.161451 -0.603279  
 6 3.087535 1.816180 1.956842  
 1 3.661190 1.374544 1.127481  
 1 3.731170 2.574046 2.434928  
 1 2.899087 1.019601 2.693511  
 6 0.031185 2.676693 -3.439212  
 1 -0.450531 3.486894 -4.011554  
 1 0.863384 3.115012 -2.867969  
 1 0.445318 1.955771 -4.162952  
 6 -1.867615 3.011328 -0.978515  
 1 -1.973869 4.034093 -1.374086  
 1 -2.849589 2.676999 -0.611346  
 1 -1.170106 3.010609 -0.127520  
 6 -2.606987 1.049521 -3.273670  
 1 -3.269613 1.830824 -3.682255  
 1 -2.227328 0.450230 -4.115059  
 1 -3.212049 0.386246 -2.637585  
**TSKD**  
 77 -0.135224 -0.440799 -0.111193  
 7 -2.143749 -0.045284 0.251116

|    |           |           |           |             |           |           |           |
|----|-----------|-----------|-----------|-------------|-----------|-----------|-----------|
| 6  | -2.512560 | 0.939584  | 1.100791  | 1           | 0.317335  | 2.111686  | 3.376226  |
| 6  | -3.100051 | -0.791410 | -0.361887 | 6           | 1.289311  | 2.931997  | -2.274668 |
| 6  | -3.834156 | 1.225797  | 1.375982  | 1           | 1.197177  | 3.341255  | -3.292669 |
| 1  | -1.685552 | 1.508579  | 1.523315  | 1           | 1.543886  | 3.754729  | -1.593618 |
| 6  | -4.464551 | -0.525984 | -0.135621 | 1           | 2.135986  | 2.229087  | -2.268019 |
| 6  | -4.850975 | 0.483844  | 0.738135  | 6           | -1.721952 | 3.135732  | -1.109271 |
| 1  | -4.076082 | 2.034519  | 2.067135  | 1           | -1.862784 | 3.973665  | -1.813251 |
| 1  | -5.192948 | -1.145657 | -0.659329 | 1           | -2.665653 | 2.568682  | -1.101604 |
| 7  | 1.917058  | -0.756556 | -0.320324 | 1           | -1.543975 | 3.537063  | -0.105460 |
| 6  | 2.579346  | -0.527261 | -1.477470 | 6           | -1.081495 | 1.720350  | -3.546849 |
| 6  | 2.632147  | -1.088396 | 0.789918  | 1           | -1.332232 | 2.658994  | -4.073205 |
| 6  | 3.953663  | -0.599912 | -1.583728 | 1           | -0.380018 | 1.158821  | -4.189400 |
| 1  | 1.952255  | -0.274363 | -2.331543 | 1           | -2.007469 | 1.122933  | -3.473582 |
| 6  | 4.037292  | -1.174130 | 0.739311  | CO2         |           |           |           |
| 6  | 4.720028  | -0.924792 | -0.444416 | 6           | 0.000000  | 0.000000  | 0.000000  |
| 1  | 4.429567  | -0.396460 | -2.544083 | 8           | 0.000000  | 0.000000  | 1.163049  |
| 1  | 4.557214  | -1.436437 | 1.660984  | 8           | 0.000000  | 0.000000  | -1.163049 |
| 14 | 0.228870  | -1.605158 | 1.866037  | SiHMe3      |           |           |           |
| 14 | -1.008896 | -2.225781 | -1.277056 | 14          | -0.000010 | -0.000013 | -0.384092 |
| 8  | -2.730771 | -1.768754 | -1.154770 | 1           | -0.000016 | -0.000030 | -1.882114 |
| 8  | 1.998430  | -1.327359 | 1.914577  | 6           | 1.233663  | -1.292683 | 0.225338  |
| 6  | -0.498084 | -0.900911 | 3.457229  | 1           | 0.964692  | -2.300768 | -0.130038 |
| 1  | 0.137722  | -1.150770 | 4.322499  | 1           | 2.253247  | -1.070906 | -0.129817 |
| 1  | -0.640642 | 0.185297  | 3.431362  | 1           | 1.258789  | -1.319226 | 1.327630  |
| 1  | -1.483168 | -1.371731 | 3.616120  | 6           | -1.736349 | -0.422011 | 0.225341  |
| 6  | 0.202494  | -3.474006 | 2.135341  | 1           | -1.771838 | -0.430680 | 1.327635  |
| 1  | 0.724505  | -4.020127 | 1.337306  | 1           | -2.474813 | 0.315122  | -0.129875 |
| 1  | 0.711498  | -3.689688 | 3.089992  | 1           | -2.054219 | -1.415787 | -0.129962 |
| 1  | -0.824613 | -3.864023 | 2.205751  | 6           | 0.502695  | 1.714715  | 0.225327  |
| 6  | -1.083035 | -4.062027 | -0.860978 | 1           | 1.510335  | 1.985652  | -0.129816 |
| 1  | -1.692478 | -4.568715 | -1.627646 | 1           | -0.198959 | 2.486906  | -0.130024 |
| 1  | -0.079497 | -4.516212 | -0.872296 | 1           | 0.512861  | 1.749774  | 1.327623  |
| 1  | -1.536083 | -4.254485 | 0.120305  | CF3CO2SiMe3 |           |           |           |
| 6  | -0.625170 | -2.138545 | -3.123663 | 6           | 0.777825  | -0.479543 | 0.000080  |
| 1  | 0.426616  | -2.425192 | -3.295728 | 8           | 0.623768  | -1.672725 | 0.000124  |
| 1  | -1.261622 | -2.832812 | -3.696699 | 8           | -0.164431 | 0.442094  | -0.000025 |
| 1  | -0.768953 | -1.122129 | -3.515954 | 14          | -1.878619 | 0.084115  | -0.000094 |
| 6  | 6.220393  | -0.974586 | -0.515560 | 6           | -2.252260 | -0.875001 | 1.559971  |
| 1  | 6.658448  | -1.381901 | 0.406141  | 1           | -3.332911 | -1.079363 | 1.637922  |
| 1  | 6.556157  | -1.590004 | -1.365110 | 1           | -1.716204 | -1.835915 | 1.558494  |
| 1  | 6.628631  | 0.038469  | -0.668766 | 1           | -1.949413 | -0.307456 | 2.454429  |
| 6  | -6.300255 | 0.788071  | 0.998960  | 6           | -2.252095 | -0.875175 | -1.560092 |
| 1  | -6.526079 | 0.723533  | 2.075712  | 1           | -3.332756 | -1.079423 | -1.638207 |
| 1  | -6.543886 | 1.815107  | 0.680679  | 1           | -1.949026 | -0.307782 | -2.454571 |
| 1  | -6.964872 | 0.096057  | 0.463481  | 1           | -1.716145 | -1.836148 | -1.558397 |
| 1  | -0.185944 | 0.488290  | -1.686695 | 6           | -2.640515 | 1.788685  | -0.000229 |
| 14 | -0.320190 | 2.059900  | -1.787834 | 1           | -3.740803 | 1.720819  | -0.000262 |
| 8  | 0.367978  | 1.775382  | 0.182849  | 1           | -2.334224 | 2.358252  | 0.891420  |
| 14 | 1.383616  | 2.651382  | 1.162548  | 1           | -2.334164 | 2.358142  | -0.891929 |
| 6  | 0.846364  | 4.465700  | 1.184977  | 6           | 2.178903  | 0.175077  | 0.000095  |
| 1  | 0.817735  | 4.909230  | 0.177768  | 9           | 3.133845  | -0.749241 | 0.000184  |
| 1  | -0.161543 | 4.568202  | 1.620180  | 9           | 2.330921  | 0.945228  | -1.085598 |
| 1  | 1.538210  | 5.066605  | 1.798740  | 9           | 2.330840  | 0.945352  | 1.085712  |
| 6  | 3.198643  | 2.562294  | 0.635140  | O(SiMe3)2   |           |           |           |
| 1  | 3.822549  | 3.106246  | 1.364641  | 8           | 0.000008  | -0.000127 | 0.616297  |
| 1  | 3.553474  | 1.521462  | 0.608478  | 14          | 1.579604  | -0.001448 | 0.073094  |
| 1  | 3.375448  | 3.004045  | -0.355548 | 14          | -1.579594 | 0.001482  | 0.073090  |
| 6  | 1.328331  | 2.038153  | 2.945384  | 6           | 2.665895  | -0.517426 | 1.512700  |
| 1  | 1.667192  | 0.995163  | 3.030500  | 1           | 3.730654  | -0.527939 | 1.226745  |
| 1  | 1.996475  | 2.661035  | 3.563934  | 1           | 2.547125  | 0.177719  | 2.359541  |

|              |           |           |           |                             |           |           |           |
|--------------|-----------|-----------|-----------|-----------------------------|-----------|-----------|-----------|
| 1            | 2.396858  | -1.526476 | 1.864739  | 1                           | 1.373939  | 1.785282  | 1.625925  |
| 6            | 1.740619  | -1.221386 | -1.352952 | 1                           | -0.409195 | 1.666973  | 1.562291  |
| 1            | 1.439826  | -2.234455 | -1.039807 | 1                           | 0.540389  | 0.445754  | 2.455740  |
| 1            | 1.100797  | -0.926466 | -2.201178 | 6                           | 0.524420  | 1.085519  | -1.558454 |
| 1            | 2.778874  | -1.274489 | -1.720353 | 1                           | 1.373810  | 1.785320  | -1.626099 |
| 6            | 2.026036  | 1.731030  | -0.508222 | 1                           | 0.539664  | 0.446003  | -2.455654 |
| 1            | 1.891683  | 2.462332  | 0.305458  | 1                           | -0.409348 | 1.667321  | -1.561793 |
| 1            | 3.075490  | 1.784266  | -0.842561 | 6                           | 2.148055  | -1.051565 | -0.000139 |
| 1            | 1.386535  | 2.042075  | -1.350170 | 1                           | 3.071519  | -0.449362 | -0.000125 |
| 6            | -1.739431 | 1.217303  | -1.356606 | 1                           | 2.163915  | -1.698639 | 0.891293  |
| 1            | -1.437677 | 2.231055  | -1.046632 | 1                           | 2.163879  | -1.698526 | -0.891657 |
| 1            | -1.100039 | 0.919179  | -2.204034 | CH3OSiMe3 (dimer structure) |           |           |           |
| 1            | -2.777701 | 1.270224  | -1.724009 | 6                           | -0.950445 | 2.715293  | 0.000000  |
| 6            | -2.027741 | -1.732283 | -0.503012 | 1                           | -0.839643 | 3.822507  | 0.000000  |
| 1            | -1.387916 | -2.046761 | -1.343446 | 8                           | -0.008317 | 1.960253  | 0.000000  |
| 1            | -1.894761 | -2.461074 | 0.313145  | 8                           | -2.225458 | 2.365864  | 0.000000  |
| 1            | -3.076996 | -1.785472 | -0.837961 | 14                          | -2.809264 | 0.716488  | 0.000000  |
| 6            | -2.665395 | 0.522845  | 1.511132  | 6                           | -2.225458 | -0.125723 | 1.562028  |
| 1            | -3.730138 | 0.533539  | 1.225118  | 1                           | -2.752079 | -1.086319 | 1.685968  |
| 1            | -2.547328 | -0.169898 | 2.360037  | 1                           | -1.151135 | -0.345373 | 1.499309  |
| 1            | -2.395394 | 1.532676  | 1.860181  | 1                           | -2.427459 | 0.494799  | 2.449663  |
| CH2(OSiMe3)2 |           |           |           | 6                           | -2.225458 | -0.125723 | -1.562028 |
| 6            | 0.029909  | -1.488708 | -0.362796 | 1                           | -2.752079 | -1.086319 | -1.685968 |
| 1            | -0.182724 | -1.915051 | 0.641973  | 1                           | -2.427459 | 0.494799  | -2.449663 |
| 1            | -0.295103 | -2.222266 | -1.125889 | 1                           | -1.151135 | -0.345373 | -1.499309 |
| 8            | 1.389074  | -1.283821 | -0.518304 | 6                           | -4.663611 | 0.979925  | 0.000000  |
| 8            | -0.668436 | -0.281960 | -0.525193 | 1                           | -5.191002 | 0.011735  | 0.000000  |
| 14           | 2.224990  | 0.093573  | 0.004290  | 1                           | -4.984871 | 1.541783  | 0.891752  |
| 14           | -2.219281 | 0.103611  | 0.012200  | 1                           | -4.984871 | 1.541783  | -0.891752 |
| 6            | 1.968625  | 1.524543  | -1.183538 | 6                           | 0.950445  | -2.715293 | 0.000000  |
| 1            | 0.913329  | 1.834654  | -1.189901 | 1                           | 0.839643  | -3.822507 | 0.000000  |
| 1            | 2.592263  | 2.390267  | -0.904025 | 8                           | 0.008317  | -1.960253 | 0.000000  |
| 1            | 2.240578  | 1.226479  | -2.209169 | 8                           | 2.225458  | -2.365864 | 0.000000  |
| 6            | 4.022144  | -0.443303 | -0.004041 | 14                          | 2.809264  | -0.716488 | 0.000000  |
| 1            | 4.684394  | 0.389057  | 0.286145  | 6                           | 2.225458  | 0.125723  | 1.562028  |
| 1            | 4.192167  | -1.276722 | 0.696275  | 1                           | 2.752079  | 1.086319  | 1.685968  |
| 1            | 4.321984  | -0.780580 | -1.009356 | 1                           | 1.151135  | 0.345373  | 1.499309  |
| 6            | 1.677162  | 0.559026  | 1.745245  | 1                           | 2.427459  | -0.494799 | 2.449663  |
| 1            | 1.728202  | -0.308965 | 2.422975  | 6                           | 2.225458  | 0.125723  | -1.562028 |
| 1            | 2.326136  | 1.347829  | 2.160505  | 1                           | 2.752079  | 1.086319  | -1.685968 |
| 1            | 0.643055  | 0.935547  | 1.747286  | 1                           | 2.427459  | -0.494799 | -2.449663 |
| 6            | -2.378016 | -0.289470 | 1.846130  | 1                           | 1.151135  | 0.345373  | -1.499309 |
| 1            | -3.365576 | 0.026098  | 2.221862  | 6                           | 4.663611  | -0.979925 | 0.000000  |
| 1            | -2.279489 | -1.368962 | 2.045143  | 1                           | 5.191002  | -0.011735 | 0.000000  |
| 1            | -1.609109 | 0.234867  | 2.435725  | 1                           | 4.984871  | -1.541783 | 0.891752  |
| 6            | -2.379473 | 1.940888  | -0.310135 | 1                           | 4.984871  | -1.541783 | -0.891752 |
| 1            | -2.227442 | 2.161384  | -1.378805 | HSiMe(OMe)2                 |           |           |           |
| 1            | -3.376920 | 2.311671  | -0.022859 | 14                          | 0.011229  | 0.585193  | -0.591438 |
| 1            | -1.626856 | 2.506112  | 0.262563  | 1                           | 0.020576  | 1.268969  | -1.901020 |
| 6            | -3.484955 | -0.880139 | -0.969576 | 6                           | -0.122886 | 1.771398  | 0.855787  |
| 1            | -4.513341 | -0.610382 | -0.676910 | 1                           | -0.080307 | 1.251786  | 1.826947  |
| 1            | -3.377582 | -0.688677 | -2.049526 | 1                           | 0.703931  | 2.499371  | 0.831462  |
| 1            | -3.365371 | -1.963714 | -0.804628 | 1                           | -1.072079 | 2.330229  | 0.816566  |
| HCO2SiMe3    |           |           |           | 8                           | -1.303386 | -0.436989 | -0.615739 |
| 6            | -1.950516 | -0.727310 | -0.000004 | 8                           | 1.452781  | -0.245629 | -0.523856 |
| 1            | -2.616276 | -1.618511 | 0.000157  | 6                           | -1.910248 | -1.090727 | 0.469623  |
| 8            | -2.357738 | 0.407061  | 0.000066  | 1                           | -2.092790 | -0.411457 | 1.323908  |
| 8            | -0.671852 | -1.090308 | -0.000039 | 1                           | -2.883846 | -1.492990 | 0.146542  |
| 14           | 0.640338  | 0.055903  | -0.000015 | 1                           | -1.300553 | -1.938249 | 0.835015  |
| 6            | 0.524656  | 1.085310  | 1.558585  | 6                           | 1.903626  | -1.068683 | 0.521962  |

1 1.367952 -2.036039 0.540932  
1 2.975126 -1.280052 0.376245  
1 1.786665 -0.595249 1.516068

CF<sub>3</sub>CO<sub>2</sub>SiMe(OMe)<sub>2</sub>

6 1.104862 0.484940 0.090439  
8 0.960419 1.679675 0.114666  
8 0.160039 -0.426717 0.194898  
14 -1.531851 -0.058808 0.356890  
6 -1.824891 0.769890 1.980682  
1 -2.893405 1.000417 2.113273  
1 -1.507092 0.116889 2.807772  
1 -1.252322 1.708300 2.034456  
6 2.492555 -0.179442 -0.061096  
9 3.440763 0.737430 -0.221323  
9 2.776574 -0.902584 1.029969  
9 2.503171 -0.996062 -1.121999  
8 -1.978681 0.795768 -0.971643  
8 -2.229582 -1.537800 0.314418  
6 -2.012718 2.195512 -1.179971  
1 -2.371029 2.382778 -2.203228  
1 -2.706900 2.688937 -0.476713  
1 -1.013784 2.642854 -1.059593  
6 -2.134441 -2.467272 -0.749903  
1 -2.554932 -2.051963 -1.681584  
1 -1.085153 -2.755454 -0.934516  
1 -2.703808 -3.367677 -0.475771
